# Supplementary material for: Therapeutic targeting of ARID1A and PI3K/AKT pathway alterations in cholangiocarcinoma
Source: PeerJ. 2022 Jan 13;10:e12750. doi: 10.7717/peerj.12750 (PMC8761367; doi:10.7717/peerj.12750)
Supplement: Supplemental Information 3 [file peerj-10-12750-s003.xlsx]

## Sheet: Supplemental Table1
Supplemental Table 1 : Clinical characteristics and genetic alterations of 795 CCA patients
Study ID	Sample ID	Altered	TP53	ARID1A	KRAS	EPHA2	STK11	PIK3CA	RASA1	LAMA2	ERBB2	LAMA1	BRAF	ERBB4	FGFR2	PIK3R1	PTEN	KDR	NRAS	TNN	Overall Survival (Months)	Overall Survival status	Age	Liver fluke status	Stage	Anatomical subtype
chol_icgc_2017	CCA_BR_1	1	no alteration	N1571* (driver)	no alteration	I145Nfs*5	no alteration	no alteration	no alteration	no alteration	no alteration	no alteration	no alteration	no alteration	no alteration	no alteration	no alteration	no alteration	no alteration	no alteration	0.866667	DECEASED	53	Fluke-Neg	N/A	Intrahepatic
chol_icgc_2017	CCA_BR_2	1	no alteration	no alteration	Q61K (driver)	no alteration	no alteration	no alteration	no alteration	no alteration	no alteration	no alteration	no alteration	no alteration	no alteration	no alteration	no alteration	no alteration	no alteration	no alteration	18.8667	DECEASED	49	Fluke-Neg	IVB	Intrahepatic
chol_icgc_2017	CCA_BR_3	0	no alteration	no alteration	no alteration	no alteration	no alteration	no alteration	no alteration	no alteration	no alteration	no alteration	no alteration	no alteration	no alteration	no alteration	no alteration	no alteration	no alteration	no alteration	0.233333	DECEASED	61	Fluke-Neg	IA	Intrahepatic
chol_icgc_2017	CCA_CH_1	1	no alteration	no alteration	no alteration	no alteration	no alteration	no alteration	no alteration	no alteration	no alteration	no alteration	no alteration	no alteration	no alteration	X582_splice (driver)	no alteration	no alteration	no alteration	no alteration	14.1667	DECEASED	49	Fluke-Neg	IIB	Perihilar
chol_icgc_2017	CCA_CH_2	0	no alteration	no alteration	no alteration	no alteration	no alteration	no alteration	no alteration	no alteration	no alteration	no alteration	no alteration	no alteration	no alteration	no alteration	no alteration	no alteration	no alteration	no alteration	N/A	N/A	61	Fluke-Pos	II	Perihilar
chol_icgc_2017	CCA_CH_3	0	no alteration	no alteration	no alteration	no alteration	no alteration	no alteration	no alteration	no alteration	no alteration	no alteration	no alteration	no alteration	no alteration	no alteration	no alteration	no alteration	no alteration	no alteration	11.5333	DECEASED	46	Fluke-Neg	II	Perihilar
chol_icgc_2017	CCA_CH_4	1	P151H (driver)	no alteration	no alteration	no alteration	no alteration	no alteration	no alteration	no alteration	no alteration	no alteration	no alteration	no alteration	no alteration	no alteration	no alteration	no alteration	no alteration	no alteration	16.2	LIVING	46	Fluke-Neg	IIIB	Extrahepatic
chol_icgc_2017	CCA_CH_5	0	no alteration	no alteration	no alteration	no alteration	no alteration	no alteration	no alteration	no alteration	no alteration	no alteration	no alteration	no alteration	no alteration	no alteration	no alteration	no alteration	no alteration	no alteration	20.7667	LIVING	75	Fluke-Neg	I	Intrahepatic
chol_icgc_2017	CCA_CH_6	0	no alteration	no alteration	no alteration	no alteration	no alteration	no alteration	no alteration	no alteration	no alteration	no alteration	no alteration	no alteration	no alteration	no alteration	no alteration	no alteration	no alteration	no alteration	20.2667	LIVING	59	Fluke-Neg	III	Intrahepatic
chol_icgc_2017	CCA_CH_7	1	X261_splice (driver)	no alteration	G12D (driver)	no alteration	no alteration	no alteration	no alteration	no alteration	no alteration	no alteration	no alteration	no alteration	no alteration	no alteration	no alteration	no alteration	no alteration	no alteration	2.3	DECEASED	71	Fluke-Neg	IVA	Intrahepatic
chol_icgc_2017	CCA_CH_8	1	Y163C (driver)	no alteration	G12V (driver)	no alteration	no alteration	no alteration	no alteration	no alteration	no alteration	no alteration	no alteration	no alteration	no alteration	no alteration	no alteration	no alteration	no alteration	no alteration	17.7333	DECEASED	60	Fluke-Neg	II	Intrahepatic
chol_icgc_2017	CCA_FR_1	1	no alteration	Q585* (driver)	no alteration	no alteration	no alteration	no alteration	no alteration	no alteration	no alteration	no alteration	no alteration	no alteration	no alteration	no alteration	no alteration	no alteration	no alteration	no alteration	68.1333	LIVING	49	Fluke-Neg	N/A	Intrahepatic
chol_icgc_2017	CCA_FR_10	0	N/A	N/A	N/A	N/A	N/A	N/A	N/A	N/A	N/A	N/A	N/A	N/A	N/A	N/A	N/A	N/A	N/A	N/A	107.233	LIVING	29	Fluke-Neg	IVA	Intrahepatic
chol_icgc_2017	CCA_FR_11	1	no alteration	no alteration	no alteration	no alteration	no alteration	no alteration	P144Wfs*28 (driver)	no alteration	no alteration	no alteration	no alteration	no alteration	no alteration	no alteration	no alteration	no alteration	no alteration	no alteration	103.8	LIVING	45	Fluke-Neg	II	Intrahepatic
chol_icgc_2017	CCA_FR_12	1	no alteration	no alteration	no alteration	no alteration	no alteration	no alteration	no alteration	no alteration	no alteration	no alteration	V600E (driver)	no alteration	no alteration	no alteration	no alteration	no alteration	no alteration	no alteration	8.9	LIVING	43	Fluke-Neg	IVA	Intrahepatic
chol_icgc_2017	CCA_FR_13	0	no alteration	no alteration	no alteration	no alteration	no alteration	no alteration	no alteration	no alteration	no alteration	no alteration	no alteration	no alteration	no alteration	no alteration	no alteration	no alteration	no alteration	no alteration	46.7	DECEASED	51	Fluke-Neg	N/A	Intrahepatic
chol_icgc_2017	CCA_FR_14	1	V157F (driver)	no alteration	no alteration	no alteration	no alteration	no alteration	no alteration	no alteration	no alteration	no alteration	no alteration	no alteration	no alteration	no alteration	R173H (driver)	no alteration	no alteration	no alteration	7.3	LIVING	52	Fluke-Neg	N/A	Intrahepatic
chol_icgc_2017	CCA_FR_15	1	no alteration	T1917Yfs*4 (driver)	no alteration	no alteration	no alteration	no alteration	no alteration	no alteration	no alteration	no alteration	no alteration	no alteration	no alteration	no alteration	no alteration	no alteration	no alteration	no alteration	51.0333	LIVING	56	Fluke-Neg	IVA	Intrahepatic
chol_icgc_2017	CCA_FR_16	1	no alteration	A2204Pfs*27 (driver)	no alteration	no alteration	no alteration	no alteration	no alteration	no alteration	no alteration	no alteration	no alteration	no alteration	no alteration	no alteration	no alteration	no alteration	no alteration	no alteration	0.633333	LIVING	78	Fluke-Neg	N/A	Intrahepatic
chol_icgc_2017	CCA_FR_2	0	no alteration	no alteration	no alteration	no alteration	no alteration	no alteration	no alteration	no alteration	no alteration	no alteration	no alteration	no alteration	no alteration	no alteration	no alteration	no alteration	no alteration	no alteration	10.9333	LIVING	78	Fluke-Neg	N/A	Intrahepatic
chol_icgc_2017	CCA_FR_3	1	R175H (driver), R158C (driver)	no alteration	no alteration	no alteration	no alteration	T1025A (driver)	P141Lfs*33 (driver)	E1727*	no alteration	no alteration	no alteration	R938C, D376Y	no alteration	no alteration	no alteration	no alteration	no alteration	no alteration	9.33333	LIVING	60	Fluke-Neg	N/A	Intrahepatic
chol_icgc_2017	CCA_FR_4	1	no alteration	no alteration	no alteration	no alteration	no alteration	no alteration	no alteration	no alteration	no alteration	no alteration	no alteration	no alteration	H167_N173del (driver)	no alteration	no alteration	no alteration	no alteration	no alteration	5.26667	DECEASED	75	Fluke-Neg	IVA	Intrahepatic
chol_icgc_2017	CCA_FR_5	1	no alteration	no alteration	no alteration	no alteration	no alteration	no alteration	no alteration	no alteration	no alteration	no alteration	no alteration	no alteration	no alteration	no alteration	no alteration	no alteration	Q61R (driver)	no alteration	17.6333	LIVING	76	Fluke-Neg	N/A	Intrahepatic
chol_icgc_2017	CCA_FR_6	1	no alteration	no alteration	no alteration	P786A	no alteration	no alteration	no alteration	no alteration	no alteration	no alteration	N581S (driver)	no alteration	no alteration	no alteration	no alteration	no alteration	no alteration	no alteration	64.1333	LIVING	68	Fluke-Neg	I	Intrahepatic
chol_icgc_2017	CCA_FR_7	0	no alteration	no alteration	no alteration	no alteration	no alteration	no alteration	no alteration	no alteration	no alteration	no alteration	no alteration	no alteration	no alteration	no alteration	no alteration	no alteration	no alteration	no alteration	8.26667	LIVING	77	Fluke-Neg	IVA	Intrahepatic
chol_icgc_2017	CCA_FR_8	0	no alteration	no alteration	no alteration	no alteration	no alteration	no alteration	no alteration	no alteration	no alteration	no alteration	no alteration	no alteration	no alteration	no alteration	no alteration	no alteration	no alteration	no alteration	74.1667	LIVING	73	Fluke-Neg	N/A	Intrahepatic
chol_icgc_2017	CCA_FR_9	0	no alteration	no alteration	no alteration	no alteration	no alteration	no alteration	no alteration	no alteration	no alteration	no alteration	no alteration	no alteration	no alteration	no alteration	no alteration	no alteration	no alteration	no alteration	56.3	LIVING	62	Fluke-Neg	IVA	Intrahepatic
chol_icgc_2017	CCA_IT_1	1	R306* (driver)	no alteration	no alteration	no alteration	P281Rfs*6 (driver)	no alteration	no alteration	no alteration	no alteration	no alteration	no alteration	Y1066H	no alteration	no alteration	no alteration	no alteration	no alteration	G246C	35.7	LIVING	69	Fluke-Neg	IVA	Intrahepatic
chol_icgc_2017	CCA_IT_2	1	no alteration	no alteration	G12V (driver)	no alteration	no alteration	no alteration	no alteration	no alteration	no alteration	no alteration	no alteration	no alteration	no alteration	no alteration	no alteration	no alteration	no alteration	no alteration	26.9	LIVING	76	Fluke-Neg	III	Intrahepatic
chol_icgc_2017	CCA_IT_3	1	X187_splice (driver)	no alteration	G12V (driver)	no alteration	no alteration	no alteration	no alteration	no alteration	no alteration	no alteration	no alteration	no alteration	no alteration	no alteration	no alteration	no alteration	no alteration	no alteration	9.86667	DECEASED	53	Fluke-Neg	IVA	Intrahepatic
chol_icgc_2017	CCA_IT_4	1	no alteration	no alteration	no alteration	no alteration	no alteration	no alteration	W638* (driver)	no alteration	no alteration	no alteration	no alteration	no alteration	no alteration	no alteration	no alteration	no alteration	no alteration	no alteration	5.6	LIVING	73	Fluke-Neg	III	Intrahepatic
chol_icgc_2017	CCA_IT_5	0	N/A	N/A	N/A	N/A	N/A	N/A	N/A	N/A	N/A	N/A	N/A	N/A	N/A	N/A	N/A	N/A	N/A	N/A	40	N/A	62	Fluke-Neg	II	Intrahepatic
chol_icgc_2017	CCA_IT_6	0	N/A	N/A	N/A	N/A	N/A	N/A	N/A	N/A	N/A	N/A	N/A	N/A	N/A	N/A	N/A	N/A	N/A	N/A	52	N/A	43	Fluke-Neg	IV	Intrahepatic
chol_icgc_2017	CCA_IT_7	0	N/A	N/A	N/A	N/A	N/A	N/A	N/A	N/A	N/A	N/A	N/A	N/A	N/A	N/A	N/A	N/A	N/A	N/A	6	N/A	72	Fluke-Neg	IV	Intrahepatic
chol_icgc_2017	CCA_IT_8	0	N/A	N/A	N/A	N/A	N/A	N/A	N/A	N/A	N/A	N/A	N/A	N/A	N/A	N/A	N/A	N/A	N/A	N/A	40.2	N/A	70	Fluke-Neg	I	Intrahepatic
chol_icgc_2017	CCA_JP_1	1	no alteration	G1665* (driver)	no alteration	no alteration	no alteration	no alteration	no alteration	no alteration	no alteration	no alteration	no alteration	no alteration	no alteration	no alteration	no alteration	no alteration	no alteration	no alteration	63.5	N/A	64	Fluke-Neg	II	Intrahepatic
chol_icgc_2017	CCA_JP_10	1	no alteration	no alteration	G13D (driver)	no alteration	no alteration	no alteration	no alteration	no alteration	no alteration	no alteration	no alteration	no alteration	no alteration	no alteration	no alteration	no alteration	no alteration	no alteration	12.8667	DECEASED	31	Fluke-Neg	IVA	Intrahepatic
chol_icgc_2017	CCA_JP_100	0	no alteration	no alteration	no alteration	no alteration	no alteration	no alteration	no alteration	no alteration	no alteration	no alteration	no alteration	no alteration	no alteration	no alteration	no alteration	no alteration	no alteration	no alteration	29.9667	N/A	N/A	Fluke-Neg	II	Intrahepatic
chol_icgc_2017	CCA_JP_101	1	Y234C (driver)	no alteration	no alteration	no alteration	no alteration	no alteration	no alteration	no alteration	no alteration	no alteration	no alteration	no alteration	no alteration	no alteration	no alteration	no alteration	no alteration	no alteration	68.9	N/A	N/A	Fluke-Neg	IIB	Intrahepatic
chol_icgc_2017	CCA_JP_102	1	R280T (driver)	no alteration	no alteration	no alteration	no alteration	no alteration	no alteration	no alteration	no alteration	no alteration	no alteration	no alteration	no alteration	no alteration	no alteration	no alteration	no alteration	no alteration	29.1333	N/A	N/A	Fluke-Neg	IIB	Intrahepatic
chol_icgc_2017	CCA_JP_103	0	no alteration	no alteration	no alteration	no alteration	no alteration	no alteration	no alteration	no alteration	no alteration	no alteration	no alteration	no alteration	no alteration	no alteration	no alteration	no alteration	no alteration	no alteration	60.9667	N/A	N/A	Fluke-Neg	III	Intrahepatic
chol_icgc_2017	CCA_JP_104	0	no alteration	no alteration	no alteration	no alteration	no alteration	no alteration	no alteration	no alteration	no alteration	no alteration	no alteration	no alteration	no alteration	no alteration	no alteration	no alteration	no alteration	no alteration	38.0667	N/A	N/A	Fluke-Neg	II	Intrahepatic
chol_icgc_2017	CCA_JP_105	0	N/A	N/A	N/A	N/A	N/A	N/A	N/A	N/A	N/A	N/A	N/A	N/A	N/A	N/A	N/A	N/A	N/A	N/A	61.8667	N/A	N/A	Fluke-Neg	II	Intrahepatic
chol_icgc_2017	CCA_JP_106	0	no alteration	no alteration	no alteration	no alteration	no alteration	no alteration	no alteration	no alteration	no alteration	no alteration	no alteration	no alteration	no alteration	no alteration	no alteration	no alteration	no alteration	no alteration	66.0333	N/A	N/A	Fluke-Neg	II	Intrahepatic
chol_icgc_2017	CCA_JP_107	0	no alteration	no alteration	no alteration	no alteration	no alteration	no alteration	no alteration	no alteration	no alteration	no alteration	no alteration	no alteration	no alteration	no alteration	no alteration	no alteration	no alteration	no alteration	20.3	N/A	N/A	Fluke-Neg	IIIB	Intrahepatic
chol_icgc_2017	CCA_JP_108	1	no alteration	no alteration	Q61H (driver)	no alteration	no alteration	no alteration	no alteration	no alteration	no alteration	no alteration	no alteration	no alteration	no alteration	no alteration	no alteration	no alteration	no alteration	no alteration	66.1	N/A	N/A	Fluke-Neg	II	Perihilar
chol_icgc_2017	CCA_JP_109	1	R209Kfs*6 (driver)	no alteration	no alteration	no alteration	no alteration	no alteration	no alteration	no alteration	no alteration	no alteration	no alteration	no alteration	no alteration	no alteration	no alteration	no alteration	no alteration	no alteration	29.9667	N/A	N/A	Fluke-Neg	IB	Perihilar
chol_icgc_2017	CCA_JP_11	0	N/A	N/A	N/A	N/A	N/A	N/A	N/A	N/A	N/A	N/A	N/A	N/A	N/A	N/A	N/A	N/A	N/A	N/A	9.36667	N/A	N/A	Fluke-Neg	II	Intrahepatic
chol_icgc_2017	CCA_JP_110	1	no alteration	X1180_splice (driver)	no alteration	no alteration	no alteration	no alteration	no alteration	no alteration	no alteration	no alteration	no alteration	no alteration	no alteration	no alteration	no alteration	no alteration	no alteration	no alteration	12.6667	N/A	N/A	Fluke-Neg	II	Distal
chol_icgc_2017	CCA_JP_111	1	no alteration	D1850Tfs*33 (driver)	no alteration	no alteration	no alteration	no alteration	no alteration	no alteration	no alteration	no alteration	no alteration	no alteration	no alteration	S565I	no alteration	no alteration	no alteration	no alteration	23.4	N/A	N/A	Fluke-Neg	IVA	Intrahepatic
chol_icgc_2017	CCA_JP_112	1	E285K (driver)	no alteration	no alteration	no alteration	no alteration	no alteration	no alteration	R499S	no alteration	no alteration	no alteration	R847C	no alteration	T576del (driver)	no alteration	no alteration	no alteration	no alteration	22.7	N/A	N/A	Fluke-Neg	III	Intrahepatic
chol_icgc_2017	CCA_JP_113	1	no alteration	no alteration	G12V (driver), G12R (driver)	no alteration	no alteration	no alteration	no alteration	no alteration	no alteration	no alteration	no alteration	no alteration	no alteration	no alteration	no alteration	no alteration	no alteration	no alteration	41.8	N/A	N/A	Fluke-Neg	I	Distal
chol_icgc_2017	CCA_JP_114	0	N/A	N/A	N/A	N/A	N/A	N/A	N/A	N/A	N/A	N/A	N/A	N/A	N/A	N/A	N/A	N/A	N/A	N/A	3.66667	N/A	N/A	Fluke-Neg	IIIB	Intrahepatic
chol_icgc_2017	CCA_JP_115	1	C176Y (driver)	G352E	G12D (driver)	no alteration	no alteration	no alteration	G83E	no alteration	no alteration	G2581*	no alteration	no alteration	no alteration	R373S	no alteration	no alteration	no alteration	no alteration	6.03333	N/A	N/A	Fluke-Neg	IVA	Perihilar
chol_icgc_2017	CCA_JP_116	0	N/A	N/A	N/A	N/A	N/A	N/A	N/A	N/A	N/A	N/A	N/A	N/A	N/A	N/A	N/A	N/A	N/A	N/A	55.1	N/A	N/A	Fluke-Neg	IIIB	Intrahepatic
chol_icgc_2017	CCA_JP_117	1	no alteration	no alteration	no alteration	V755A	no alteration	no alteration	no alteration	no alteration	no alteration	no alteration	no alteration	no alteration	no alteration	no alteration	no alteration	no alteration	no alteration	no alteration	29.8	N/A	N/A	Fluke-Neg	IVA	Perihilar
chol_icgc_2017	CCA_JP_118	1	no alteration	no alteration	Q61R (driver)	no alteration	no alteration	no alteration	no alteration	no alteration	no alteration	no alteration	no alteration	no alteration	no alteration	no alteration	no alteration	no alteration	no alteration	no alteration	28.3667	N/A	N/A	Fluke-Neg	II	Intrahepatic
chol_icgc_2017	CCA_JP_119	1	no alteration	Q1145* (driver)	no alteration	no alteration	no alteration	no alteration	no alteration	no alteration	no alteration	no alteration	no alteration	no alteration	no alteration	no alteration	no alteration	no alteration	no alteration	no alteration	9.26667	N/A	N/A	Fluke-Neg	III	Distal
chol_icgc_2017	CCA_JP_12	0	N/A	N/A	N/A	N/A	N/A	N/A	N/A	N/A	N/A	N/A	N/A	N/A	N/A	N/A	N/A	N/A	N/A	N/A	7.6	N/A	N/A	Fluke-Neg	II	Intrahepatic
chol_icgc_2017	CCA_JP_120	1	R248Q (driver)	S662Rfs*11 (driver)	no alteration	no alteration	no alteration	no alteration	no alteration	no alteration	no alteration	no alteration	no alteration	no alteration	no alteration	no alteration	no alteration	no alteration	no alteration	no alteration	10.2333	N/A	N/A	Fluke-Neg	IVA	Intrahepatic
chol_icgc_2017	CCA_JP_121	1	no alteration	G1282fs (driver)	no alteration	E470*	no alteration	M1043I (driver), E263*	no alteration	no alteration	no alteration	no alteration	no alteration	no alteration	no alteration	no alteration	no alteration	no alteration	no alteration	no alteration	44.5	N/A	N/A	Fluke-Neg	II	Distal
chol_icgc_2017	CCA_JP_122	1	H179R (driver)	no alteration	no alteration	no alteration	no alteration	no alteration	no alteration	no alteration	no alteration	no alteration	no alteration	no alteration	no alteration	no alteration	no alteration	no alteration	no alteration	no alteration	29.5667	N/A	N/A	Fluke-Neg	IA	Intrahepatic
chol_icgc_2017	CCA_JP_123	1	no alteration	no alteration	no alteration	no alteration	no alteration	no alteration	no alteration	no alteration	no alteration	no alteration	no alteration	no alteration	no alteration	no alteration	no alteration	no alteration	Q61R (driver)	no alteration	44.9333	N/A	N/A	Fluke-Neg	IA	Intrahepatic
chol_icgc_2017	CCA_JP_124	1	G245S (driver)	P1468Lfs*13 (driver)	no alteration	R762H	no alteration	no alteration	R749* (driver)	no alteration	no alteration	no alteration	no alteration	D960G	no alteration	no alteration	no alteration	no alteration	no alteration	no alteration	42.2	N/A	N/A	Fluke-Neg	II	Perihilar
chol_icgc_2017	CCA_JP_125	0	no alteration	no alteration	no alteration	no alteration	no alteration	no alteration	no alteration	no alteration	no alteration	no alteration	no alteration	no alteration	no alteration	no alteration	no alteration	no alteration	no alteration	no alteration	33.9	N/A	N/A	Fluke-Neg	IVA	Distal
chol_icgc_2017	CCA_JP_126	0	N/A	N/A	N/A	N/A	N/A	N/A	N/A	N/A	N/A	N/A	N/A	N/A	N/A	N/A	N/A	N/A	N/A	N/A	38.6667	N/A	N/A	Fluke-Neg	I	Intrahepatic
chol_icgc_2017	CCA_JP_127	1	no alteration	no alteration	G12D (driver)	no alteration	no alteration	no alteration	no alteration	no alteration	no alteration	no alteration	no alteration	no alteration	no alteration	no alteration	no alteration	no alteration	no alteration	no alteration	21.4333	N/A	N/A	Fluke-Neg	IVA	Intrahepatic
chol_icgc_2017	CCA_JP_128	0	N/A	N/A	N/A	N/A	N/A	N/A	N/A	N/A	N/A	N/A	N/A	N/A	N/A	N/A	N/A	N/A	N/A	N/A	47.8667	N/A	N/A	Fluke-Neg	IA	Intrahepatic
chol_icgc_2017	CCA_JP_129	1	R213* (driver)	R1276* (driver)	no alteration	no alteration	no alteration	D84N	no alteration	no alteration	V842I (driver)	no alteration	no alteration	no alteration	no alteration	no alteration	no alteration	no alteration	no alteration	no alteration	13.1333	N/A	N/A	Fluke-Neg	IVA	Intrahepatic
chol_icgc_2017	CCA_JP_13	0	N/A	N/A	N/A	N/A	N/A	N/A	N/A	N/A	N/A	N/A	N/A	N/A	N/A	N/A	N/A	N/A	N/A	N/A	5.53333	N/A	N/A	Fluke-Neg	IVA	Intrahepatic
chol_icgc_2017	CCA_JP_130	0	no alteration	no alteration	no alteration	no alteration	no alteration	no alteration	no alteration	no alteration	no alteration	no alteration	no alteration	no alteration	no alteration	no alteration	no alteration	no alteration	no alteration	no alteration	14.8333	N/A	N/A	Fluke-Neg	IVA	Intrahepatic
chol_icgc_2017	CCA_JP_131	0	no alteration	no alteration	no alteration	no alteration	no alteration	no alteration	no alteration	no alteration	no alteration	no alteration	no alteration	no alteration	no alteration	no alteration	no alteration	no alteration	no alteration	no alteration	37.8333	N/A	N/A	Fluke-Neg	IVA	Intrahepatic
chol_icgc_2017	CCA_JP_132	1	P36Afs*7 (driver)	G276Efs*87 (driver)	no alteration	P460Rfs*33	no alteration	R108H (driver)	no alteration	no alteration	no alteration	T590M	no alteration	no alteration	no alteration	no alteration	no alteration	D1112E	no alteration	no alteration	63.7	N/A	N/A	Fluke-Neg	II	Intrahepatic
chol_icgc_2017	CCA_JP_133	0	no alteration	no alteration	no alteration	no alteration	no alteration	no alteration	no alteration	no alteration	no alteration	no alteration	no alteration	no alteration	no alteration	no alteration	no alteration	no alteration	no alteration	no alteration	43.8	N/A	N/A	Fluke-Neg	IIIB	Intrahepatic
chol_icgc_2017	CCA_JP_134	0	no alteration	no alteration	no alteration	no alteration	no alteration	no alteration	no alteration	no alteration	no alteration	no alteration	no alteration	no alteration	no alteration	no alteration	no alteration	no alteration	no alteration	no alteration	38.3333	N/A	N/A	Fluke-Neg	I	Intrahepatic
chol_icgc_2017	CCA_JP_135	1	P177_C182del (driver)	no alteration	no alteration	no alteration	no alteration	no alteration	no alteration	no alteration	no alteration	no alteration	no alteration	no alteration	no alteration	no alteration	no alteration	no alteration	no alteration	no alteration	0.133333	N/A	N/A	Fluke-Neg	IVA	Perihilar
chol_icgc_2017	CCA_JP_136	1	A138V (driver)	no alteration	no alteration	no alteration	no alteration	no alteration	no alteration	no alteration	no alteration	no alteration	no alteration	no alteration	no alteration	no alteration	no alteration	no alteration	no alteration	no alteration	8.8	N/A	N/A	Fluke-Neg	IVA	Distal
chol_icgc_2017	CCA_JP_137	0	no alteration	no alteration	no alteration	no alteration	no alteration	no alteration	no alteration	no alteration	no alteration	no alteration	no alteration	no alteration	no alteration	no alteration	no alteration	no alteration	no alteration	no alteration	35.6	N/A	N/A	Fluke-Neg	I	Intrahepatic
chol_icgc_2017	CCA_JP_138	1	S127F (driver)	no alteration	Q61H (driver)	no alteration	no alteration	no alteration	no alteration	no alteration	no alteration	no alteration	no alteration	no alteration	no alteration	no alteration	no alteration	no alteration	no alteration	no alteration	5.4	N/A	N/A	Fluke-Neg	IV	Distal
chol_icgc_2017	CCA_JP_139	0	no alteration	no alteration	no alteration	no alteration	no alteration	no alteration	no alteration	no alteration	no alteration	no alteration	no alteration	no alteration	no alteration	no alteration	no alteration	no alteration	no alteration	no alteration	21.2333	N/A	N/A	Fluke-Neg	IIB	Intrahepatic
chol_icgc_2017	CCA_JP_14	0	N/A	N/A	N/A	N/A	N/A	N/A	N/A	N/A	N/A	N/A	N/A	N/A	N/A	N/A	N/A	N/A	N/A	N/A	26.1333	N/A	N/A	Fluke-Neg	IVA	Perihilar
chol_icgc_2017	CCA_JP_140	0	no alteration	no alteration	no alteration	no alteration	no alteration	no alteration	no alteration	no alteration	no alteration	no alteration	no alteration	no alteration	no alteration	no alteration	no alteration	no alteration	no alteration	no alteration	31.9	N/A	N/A	Fluke-Neg	II	Intrahepatic
chol_icgc_2017	CCA_JP_141	1	no alteration	S241Lfs*159 (driver)	no alteration	no alteration	no alteration	no alteration	no alteration	no alteration	no alteration	no alteration	no alteration	no alteration	no alteration	no alteration	no alteration	no alteration	no alteration	no alteration	22.3333	N/A	N/A	Fluke-Neg	IVA	Intrahepatic
chol_icgc_2017	CCA_JP_142	0	no alteration	no alteration	no alteration	no alteration	no alteration	no alteration	no alteration	no alteration	no alteration	no alteration	no alteration	no alteration	no alteration	no alteration	no alteration	no alteration	no alteration	no alteration	2.76667	N/A	N/A	Fluke-Neg	II	Intrahepatic
chol_icgc_2017	CCA_JP_143	1	no alteration	Q542* (driver)	G12V (driver)	no alteration	Q220* (driver)	no alteration	no alteration	no alteration	no alteration	no alteration	no alteration	no alteration	no alteration	no alteration	no alteration	no alteration	no alteration	no alteration	8.8	N/A	N/A	Fluke-Neg	IVA	Perihilar
chol_icgc_2017	CCA_JP_144	1	no alteration	no alteration	no alteration	no alteration	no alteration	no alteration	C771Afs*3 (driver)	no alteration	no alteration	no alteration	no alteration	no alteration	no alteration	no alteration	no alteration	no alteration	no alteration	no alteration	13.4333	N/A	N/A	Fluke-Neg	IVA	Distal
chol_icgc_2017	CCA_JP_145	0	no alteration	no alteration	no alteration	no alteration	no alteration	no alteration	no alteration	no alteration	no alteration	no alteration	no alteration	no alteration	no alteration	no alteration	no alteration	no alteration	no alteration	no alteration	19.4	N/A	N/A	Fluke-Neg	III	Intrahepatic
chol_icgc_2017	CCA_JP_146	1	no alteration	no alteration	G12A (driver)	no alteration	no alteration	no alteration	no alteration	no alteration	no alteration	no alteration	no alteration	no alteration	no alteration	no alteration	no alteration	no alteration	no alteration	no alteration	13.9667	N/A	N/A	Fluke-Neg	IVA	Intrahepatic
chol_icgc_2017	CCA_JP_147	1	no alteration	no alteration	no alteration	no alteration	no alteration	no alteration	no alteration	P3120Qfs*41	no alteration	no alteration	no alteration	no alteration	no alteration	no alteration	no alteration	no alteration	no alteration	no alteration	25.5667	N/A	N/A	Fluke-Neg	III	Intrahepatic
chol_icgc_2017	CCA_JP_148	1	no alteration	no alteration	G12D (driver)	no alteration	no alteration	no alteration	no alteration	no alteration	no alteration	no alteration	no alteration	no alteration	no alteration	no alteration	no alteration	no alteration	no alteration	no alteration	20.8	N/A	N/A	Fluke-Neg	III	Distal
chol_icgc_2017	CCA_JP_149	1	X331_splice (driver)	Q944* (driver)	G12V (driver)	no alteration	no alteration	no alteration	no alteration	no alteration	no alteration	no alteration	no alteration	no alteration	no alteration	no alteration	no alteration	no alteration	no alteration	no alteration	4.5	N/A	N/A	Fluke-Neg	IVA	Perihilar
chol_icgc_2017	CCA_JP_15	1	no alteration	no alteration	G12D (driver)	no alteration	no alteration	no alteration	no alteration	no alteration	no alteration	no alteration	no alteration	no alteration	no alteration	no alteration	no alteration	no alteration	no alteration	no alteration	N/A	N/A	N/A	Fluke-Neg	N/A	Intrahepatic
chol_icgc_2017	CCA_JP_150	0	no alteration	no alteration	no alteration	no alteration	no alteration	no alteration	no alteration	no alteration	no alteration	no alteration	no alteration	no alteration	no alteration	no alteration	no alteration	no alteration	no alteration	no alteration	7	N/A	N/A	Fluke-Neg	IIB	Perihilar
chol_icgc_2017	CCA_JP_151	1	no alteration	no alteration	Q61H (driver)	no alteration	no alteration	no alteration	no alteration	no alteration	no alteration	no alteration	no alteration	no alteration	no alteration	no alteration	no alteration	no alteration	no alteration	no alteration	14.2667	N/A	N/A	Fluke-Neg	II	Perihilar
chol_icgc_2017	CCA_JP_152	1	no alteration	no alteration	G12D (driver)	no alteration	no alteration	no alteration	C372F	no alteration	no alteration	no alteration	no alteration	no alteration	no alteration	no alteration	no alteration	no alteration	no alteration	no alteration	15.7333	N/A	N/A	Fluke-Neg	III	Perihilar
chol_icgc_2017	CCA_JP_153	1	no alteration	no alteration	no alteration	no alteration	no alteration	no alteration	no alteration	no alteration	no alteration	no alteration	no alteration	Q1126K	no alteration	no alteration	no alteration	no alteration	no alteration	no alteration	15.9	N/A	N/A	Fluke-Neg	IIA	Intrahepatic
chol_icgc_2017	CCA_JP_154	0	no alteration	no alteration	no alteration	no alteration	no alteration	no alteration	no alteration	no alteration	no alteration	no alteration	no alteration	no alteration	no alteration	no alteration	no alteration	no alteration	no alteration	no alteration	16.7667	N/A	N/A	Fluke-Neg	III	Distal
chol_icgc_2017	CCA_JP_155	0	no alteration	no alteration	no alteration	no alteration	no alteration	no alteration	no alteration	no alteration	no alteration	no alteration	no alteration	no alteration	no alteration	no alteration	no alteration	no alteration	no alteration	no alteration	1.13333	N/A	N/A	Fluke-Neg	IIB	Intrahepatic
chol_icgc_2017	CCA_JP_156	1	no alteration	no alteration	no alteration	no alteration	no alteration	no alteration	no alteration	no alteration	D769H (driver)	no alteration	no alteration	no alteration	no alteration	no alteration	no alteration	no alteration	no alteration	no alteration	12.9333	N/A	N/A	Fluke-Neg	IIA	Intrahepatic
chol_icgc_2017	CCA_JP_157	1	no alteration	no alteration	no alteration	no alteration	E121* (driver)	no alteration	no alteration	no alteration	no alteration	no alteration	no alteration	no alteration	no alteration	no alteration	no alteration	no alteration	no alteration	no alteration	10.4667	N/A	N/A	Fluke-Neg	I	Intrahepatic
chol_icgc_2017	CCA_JP_158	0	no alteration	no alteration	no alteration	no alteration	no alteration	no alteration	no alteration	no alteration	no alteration	no alteration	no alteration	no alteration	no alteration	no alteration	no alteration	no alteration	no alteration	no alteration	8.9	N/A	N/A	Fluke-Neg	IVA	Distal
chol_icgc_2017	CCA_JP_159	1	P177_C182del (driver)	no alteration	no alteration	no alteration	no alteration	no alteration	no alteration	no alteration	no alteration	no alteration	no alteration	no alteration	no alteration	no alteration	no alteration	no alteration	no alteration	no alteration	12.6333	N/A	N/A	Fluke-Neg	IIIB	Perihilar
chol_icgc_2017	CCA_JP_16	1	R337C (driver)	D1850Gfs*4 (driver)	no alteration	no alteration	no alteration	no alteration	no alteration	no alteration	no alteration	no alteration	no alteration	C580*	no alteration	no alteration	no alteration	no alteration	no alteration	no alteration	26.1333	N/A	N/A	Fluke-Neg	IVA	Distal
chol_icgc_2017	CCA_JP_160	1	N239D (driver)	G276Efs*87 (driver), S907Yfs*28 (driver)	no alteration	no alteration	no alteration	E110del (driver)	no alteration	no alteration	R678Q (driver)	no alteration	no alteration	no alteration	no alteration	no alteration	no alteration	R961W	no alteration	no alteration	11.9333	N/A	N/A	Fluke-Neg	II	Perihilar
chol_icgc_2017	CCA_JP_161	1	no alteration	no alteration	no alteration	no alteration	Y60* (driver)	no alteration	no alteration	no alteration	no alteration	no alteration	no alteration	no alteration	no alteration	no alteration	no alteration	no alteration	no alteration	no alteration	10.9333	N/A	N/A	Fluke-Neg	I	Perihilar
chol_icgc_2017	CCA_JP_162	0	no alteration	no alteration	no alteration	no alteration	no alteration	no alteration	no alteration	no alteration	no alteration	no alteration	no alteration	no alteration	no alteration	no alteration	no alteration	no alteration	no alteration	no alteration	7.33333	N/A	N/A	Fluke-Neg	II	Perihilar
chol_icgc_2017	CCA_JP_163	1	no alteration	Q895* (driver)	no alteration	no alteration	no alteration	M1043I (driver)	no alteration	no alteration	no alteration	no alteration	T241M (driver)	no alteration	no alteration	no alteration	no alteration	no alteration	no alteration	no alteration	4.86667	N/A	N/A	Fluke-Neg	III	Distal
chol_icgc_2017	CCA_JP_164	0	no alteration	no alteration	no alteration	no alteration	no alteration	no alteration	no alteration	no alteration	no alteration	no alteration	no alteration	no alteration	no alteration	no alteration	no alteration	no alteration	no alteration	no alteration	16.7	N/A	N/A	Fluke-Neg	IVA	Intrahepatic
chol_icgc_2017	CCA_JP_165	0	no alteration	no alteration	no alteration	no alteration	no alteration	no alteration	no alteration	no alteration	no alteration	no alteration	no alteration	no alteration	no alteration	no alteration	no alteration	no alteration	no alteration	no alteration	7.43333	N/A	N/A	Fluke-Neg	IVA	Perihilar
chol_icgc_2017	CCA_JP_166	0	N/A	N/A	N/A	N/A	N/A	N/A	N/A	N/A	N/A	N/A	N/A	N/A	N/A	N/A	N/A	N/A	N/A	N/A	75.3	N/A	N/A	Fluke-Neg	II	Perihilar
chol_icgc_2017	CCA_JP_167	1	no alteration	no alteration	no alteration	no alteration	no alteration	no alteration	no alteration	no alteration	no alteration	no alteration	no alteration	no alteration	N549K (driver)	no alteration	no alteration	no alteration	no alteration	no alteration	47.4667	N/A	N/A	Fluke-Neg	II	Intrahepatic
chol_icgc_2017	CCA_JP_168	1	R249S (driver)	no alteration	no alteration	no alteration	S283C	no alteration	no alteration	no alteration	no alteration	no alteration	no alteration	no alteration	no alteration	no alteration	no alteration	no alteration	no alteration	no alteration	4.36667	N/A	N/A	Fluke-Neg	II	Intrahepatic
chol_icgc_2017	CCA_JP_169	0	no alteration	no alteration	no alteration	no alteration	no alteration	no alteration	no alteration	no alteration	no alteration	no alteration	no alteration	no alteration	no alteration	no alteration	no alteration	no alteration	no alteration	no alteration	3.53333	N/A	N/A	Fluke-Neg	IIIB	Distal
chol_icgc_2017	CCA_JP_17	0	no alteration	no alteration	no alteration	no alteration	no alteration	no alteration	no alteration	no alteration	no alteration	no alteration	no alteration	no alteration	no alteration	no alteration	no alteration	no alteration	no alteration	no alteration	104.2	N/A	N/A	Fluke-Neg	IIA	Intrahepatic
chol_icgc_2017	CCA_JP_170	1	R280T (driver)	no alteration	G12A (driver)	no alteration	no alteration	no alteration	no alteration	no alteration	no alteration	no alteration	no alteration	no alteration	no alteration	no alteration	no alteration	no alteration	no alteration	no alteration	2.76667	N/A	N/A	Fluke-Neg	IIA	Distal
chol_icgc_2017	CCA_JP_171	1	R196* (driver)	no alteration	no alteration	no alteration	no alteration	no alteration	no alteration	no alteration	T862A (driver)	no alteration	no alteration	no alteration	no alteration	no alteration	no alteration	no alteration	no alteration	no alteration	2.26667	N/A	N/A	Fluke-Neg	IIA	Intrahepatic
chol_icgc_2017	CCA_JP_172	1	R342* (driver)	no alteration	no alteration	no alteration	R297S	H1047R (driver)	no alteration	no alteration	no alteration	no alteration	no alteration	no alteration	no alteration	no alteration	no alteration	no alteration	no alteration	no alteration	N/A	N/A	N/A	Fluke-Neg	N/A	Intrahepatic
chol_icgc_2017	CCA_JP_173	0	no alteration	no alteration	no alteration	no alteration	no alteration	no alteration	no alteration	no alteration	no alteration	no alteration	no alteration	no alteration	no alteration	no alteration	no alteration	no alteration	no alteration	no alteration	N/A	N/A	N/A	Fluke-Neg	N/A	Perihilar
chol_icgc_2017	CCA_JP_174	0	no alteration	no alteration	no alteration	no alteration	no alteration	no alteration	no alteration	no alteration	no alteration	no alteration	no alteration	no alteration	no alteration	no alteration	no alteration	no alteration	no alteration	no alteration	N/A	N/A	N/A	Fluke-Neg	N/A	Perihilar
chol_icgc_2017	CCA_JP_175	1	no alteration	no alteration	G12D (driver)	no alteration	no alteration	no alteration	no alteration	no alteration	no alteration	no alteration	no alteration	no alteration	no alteration	no alteration	no alteration	X267_splice	no alteration	no alteration	11.3667	N/A	N/A	Fluke-Neg	II	Intrahepatic
chol_icgc_2017	CCA_JP_176	0	no alteration	no alteration	no alteration	no alteration	no alteration	no alteration	no alteration	no alteration	no alteration	no alteration	no alteration	no alteration	no alteration	no alteration	no alteration	no alteration	no alteration	no alteration	23.1333	N/A	N/A	Fluke-Neg	III	Intrahepatic
chol_icgc_2017	CCA_JP_177	1	P278T (driver)	G277Rfs*123 (driver), G880Pfs*6 (driver)	G12D (driver)	M926K	no alteration	no alteration	no alteration	no alteration	no alteration	no alteration	no alteration	no alteration	no alteration	no alteration	no alteration	no alteration	no alteration	no alteration	6.93333	N/A	N/A	Fluke-Neg	II	Intrahepatic
chol_icgc_2017	CCA_JP_178	1	C242G (driver)	no alteration	no alteration	no alteration	no alteration	no alteration	no alteration	no alteration	no alteration	no alteration	N581S (driver)	no alteration	N549S (driver)	no alteration	no alteration	no alteration	no alteration	no alteration	4.16667	N/A	N/A	Fluke-Neg	IVA	Intrahepatic
chol_icgc_2017	CCA_JP_179	1	no alteration	no alteration	Q61H (driver)	no alteration	no alteration	no alteration	no alteration	no alteration	no alteration	no alteration	no alteration	no alteration	no alteration	no alteration	no alteration	no alteration	no alteration	no alteration	55.5	N/A	N/A	Fluke-Neg	IVA	Intrahepatic
chol_icgc_2017	CCA_JP_18	0	no alteration	no alteration	no alteration	no alteration	no alteration	no alteration	no alteration	no alteration	no alteration	no alteration	no alteration	no alteration	no alteration	no alteration	no alteration	no alteration	no alteration	no alteration	97.8	N/A	N/A	Fluke-Neg	II	Distal
chol_icgc_2017	CCA_JP_180	1	no alteration	no alteration	G12D (driver)	no alteration	no alteration	no alteration	no alteration	no alteration	no alteration	no alteration	no alteration	no alteration	no alteration	no alteration	no alteration	no alteration	no alteration	no alteration	60.6667	N/A	N/A	Fluke-Neg	IVA	Intrahepatic
chol_icgc_2017	CCA_JP_181	1	no alteration	no alteration	no alteration	no alteration	no alteration	no alteration	no alteration	no alteration	no alteration	no alteration	no alteration	Q1270K	no alteration	no alteration	no alteration	no alteration	no alteration	no alteration	31.0667	N/A	N/A	Fluke-Neg	IVA	Intrahepatic
chol_icgc_2017	CCA_JP_182	1	no alteration	no alteration	no alteration	no alteration	no alteration	no alteration	no alteration	no alteration	no alteration	no alteration	no alteration	no alteration	no alteration	no alteration	no alteration	no alteration	Q61R (driver)	no alteration	20.0333	N/A	N/A	Fluke-Neg	II	Intrahepatic
chol_icgc_2017	CCA_JP_183	0	no alteration	no alteration	no alteration	no alteration	no alteration	no alteration	no alteration	no alteration	no alteration	no alteration	no alteration	no alteration	no alteration	no alteration	no alteration	no alteration	no alteration	no alteration	42.7	N/A	N/A	Fluke-Neg	II	Distal
chol_icgc_2017	CCA_JP_184	1	S127F (driver)	no alteration	no alteration	no alteration	R86* (driver)	no alteration	no alteration	no alteration	no alteration	no alteration	no alteration	no alteration	no alteration	no alteration	no alteration	no alteration	no alteration	no alteration	15.2667	N/A	N/A	Fluke-Neg	II	Perihilar
chol_icgc_2017	CCA_JP_185	1	no alteration	no alteration	G12V (driver)	no alteration	no alteration	no alteration	no alteration	no alteration	no alteration	no alteration	no alteration	no alteration	no alteration	no alteration	no alteration	no alteration	no alteration	no alteration	33.7667	N/A	N/A	Fluke-Neg	IVA	Intrahepatic
chol_icgc_2017	CCA_JP_186	1	no alteration	no alteration	no alteration	F139Lfs*23	no alteration	H1047R (driver)	L773Wfs*18 (driver)	no alteration	no alteration	no alteration	no alteration	no alteration	no alteration	no alteration	no alteration	no alteration	no alteration	no alteration	31.5333	N/A	N/A	Fluke-Neg	IVA	Perihilar
chol_icgc_2017	CCA_JP_187	1	no alteration	no alteration	no alteration	no alteration	L282Rfs*6 (driver)	no alteration	no alteration	no alteration	no alteration	no alteration	no alteration	no alteration	no alteration	no alteration	no alteration	no alteration	no alteration	no alteration	24.0667	N/A	N/A	Fluke-Neg	IVA	Perihilar
chol_icgc_2017	CCA_JP_188	1	no alteration	no alteration	no alteration	R560Efs*34	no alteration	no alteration	no alteration	no alteration	no alteration	no alteration	no alteration	no alteration	no alteration	no alteration	no alteration	no alteration	no alteration	no alteration	27.2667	N/A	N/A	Fluke-Neg	II	Intrahepatic
chol_icgc_2017	CCA_JP_189	0	no alteration	no alteration	no alteration	no alteration	no alteration	no alteration	no alteration	no alteration	no alteration	no alteration	no alteration	no alteration	no alteration	no alteration	no alteration	no alteration	no alteration	no alteration	4.56667	N/A	N/A	Fluke-Neg	IVA	Perihilar
chol_icgc_2017	CCA_JP_19	0	no alteration	no alteration	no alteration	no alteration	no alteration	no alteration	no alteration	no alteration	no alteration	no alteration	no alteration	no alteration	no alteration	no alteration	no alteration	no alteration	no alteration	no alteration	34.5667	N/A	N/A	Fluke-Neg	IIIA	Distal
chol_icgc_2017	CCA_JP_190	0	no alteration	no alteration	no alteration	no alteration	no alteration	no alteration	no alteration	no alteration	no alteration	no alteration	no alteration	no alteration	no alteration	no alteration	no alteration	no alteration	no alteration	no alteration	26.3333	N/A	N/A	Fluke-Neg	I	Perihilar
chol_icgc_2017	CCA_JP_191	1	I195N (driver)	no alteration	no alteration	no alteration	no alteration	no alteration	no alteration	no alteration	no alteration	no alteration	no alteration	no alteration	no alteration	no alteration	no alteration	no alteration	no alteration	no alteration	9.23333	N/A	N/A	Fluke-Neg	II	Intrahepatic
chol_icgc_2017	CCA_JP_192	0	no alteration	no alteration	no alteration	no alteration	no alteration	no alteration	no alteration	no alteration	no alteration	no alteration	no alteration	no alteration	no alteration	no alteration	no alteration	no alteration	no alteration	no alteration	26.4333	N/A	N/A	Fluke-Neg	II	Intrahepatic
chol_icgc_2017	CCA_JP_193	1	R248G (driver)	no alteration	G12C (driver)	no alteration	no alteration	no alteration	no alteration	no alteration	no alteration	no alteration	no alteration	no alteration	no alteration	no alteration	no alteration	no alteration	no alteration	no alteration	4.8	N/A	N/A	Fluke-Neg	IVA	Intrahepatic
chol_icgc_2017	CCA_JP_194	1	no alteration	no alteration	G12D (driver)	no alteration	no alteration	no alteration	no alteration	no alteration	no alteration	no alteration	no alteration	no alteration	no alteration	no alteration	no alteration	no alteration	no alteration	no alteration	16.2	N/A	N/A	Fluke-Neg	IVA	Intrahepatic
chol_icgc_2017	CCA_JP_195	1	H193R (driver)	no alteration	no alteration	no alteration	no alteration	no alteration	no alteration	T186A	no alteration	no alteration	no alteration	no alteration	no alteration	no alteration	no alteration	no alteration	no alteration	no alteration	21.6	N/A	N/A	Fluke-Neg	IVA	Perihilar
chol_icgc_2017	CCA_JP_196	1	no alteration	no alteration	no alteration	no alteration	G163D (driver)	no alteration	no alteration	no alteration	no alteration	no alteration	no alteration	no alteration	no alteration	no alteration	no alteration	no alteration	no alteration	no alteration	47.6	N/A	N/A	Fluke-Neg	IVA	Perihilar
chol_icgc_2017	CCA_JP_197	1	no alteration	no alteration	A146T (driver)	no alteration	C134Wfs*28 (driver)	no alteration	no alteration	no alteration	no alteration	R230H	no alteration	no alteration	no alteration	no alteration	no alteration	no alteration	no alteration	no alteration	6.53333	N/A	N/A	Fluke-Neg	IVA	Distal
chol_icgc_2017	CCA_JP_198	1	V73Rfs*76 (driver)	G2087R (driver)	A18G (driver)	no alteration	no alteration	no alteration	no alteration	no alteration	no alteration	no alteration	no alteration	no alteration	no alteration	no alteration	no alteration	no alteration	no alteration	no alteration	7.26667	N/A	N/A	Fluke-Neg	IVA	Intrahepatic
chol_icgc_2017	CCA_JP_199	1	E204* (driver)	no alteration	no alteration	no alteration	no alteration	no alteration	no alteration	no alteration	no alteration	no alteration	no alteration	no alteration	no alteration	no alteration	no alteration	no alteration	no alteration	no alteration	14.6	N/A	N/A	Fluke-Neg	IIB	Perihilar
chol_icgc_2017	CCA_JP_2	0	no alteration	no alteration	no alteration	no alteration	no alteration	no alteration	no alteration	no alteration	no alteration	no alteration	no alteration	no alteration	no alteration	no alteration	no alteration	no alteration	no alteration	no alteration	53.4667	LIVING	65	Fluke-Neg	III	Intrahepatic
chol_icgc_2017	CCA_JP_20	1	no alteration	no alteration	G12D (driver)	no alteration	no alteration	no alteration	no alteration	no alteration	no alteration	no alteration	no alteration	no alteration	no alteration	no alteration	no alteration	no alteration	no alteration	no alteration	38.4333	N/A	N/A	Fluke-Neg	IVA	Perihilar
chol_icgc_2017	CCA_JP_200	1	no alteration	no alteration	A146T (driver)	P460Rfs*33	no alteration	no alteration	no alteration	no alteration	no alteration	no alteration	no alteration	no alteration	no alteration	no alteration	no alteration	G438S	no alteration	no alteration	80	N/A	N/A	Fluke-Neg	II	Perihilar
chol_icgc_2017	CCA_JP_201	0	no alteration	no alteration	no alteration	no alteration	no alteration	no alteration	no alteration	no alteration	no alteration	no alteration	no alteration	no alteration	no alteration	no alteration	no alteration	no alteration	no alteration	no alteration	120.333	N/A	N/A	Fluke-Neg	II	Intrahepatic
chol_icgc_2017	CCA_JP_202	0	no alteration	no alteration	no alteration	no alteration	no alteration	no alteration	no alteration	no alteration	no alteration	no alteration	no alteration	no alteration	no alteration	no alteration	no alteration	no alteration	no alteration	no alteration	28.8	N/A	N/A	Fluke-Neg	II	Perihilar
chol_icgc_2017	CCA_JP_203	1	no alteration	no alteration	no alteration	no alteration	no alteration	no alteration	no alteration	no alteration	no alteration	G1146V	N581S (driver)	no alteration	no alteration	no alteration	Q245* (driver)	no alteration	no alteration	no alteration	37.6	N/A	N/A	Fluke-Neg	IVA	Intrahepatic
chol_icgc_2017	CCA_JP_204	1	E258* (driver)	no alteration	no alteration	no alteration	no alteration	no alteration	no alteration	no alteration	no alteration	no alteration	no alteration	no alteration	no alteration	no alteration	no alteration	no alteration	no alteration	no alteration	58.6	N/A	N/A	Fluke-Neg	IB	Intrahepatic
chol_icgc_2017	CCA_JP_205	0	no alteration	no alteration	no alteration	no alteration	no alteration	no alteration	no alteration	no alteration	no alteration	no alteration	no alteration	no alteration	no alteration	no alteration	no alteration	no alteration	no alteration	no alteration	70.6	N/A	N/A	Fluke-Neg	I	Distal
chol_icgc_2017	CCA_JP_206	0	no alteration	no alteration	no alteration	no alteration	no alteration	no alteration	no alteration	no alteration	no alteration	no alteration	no alteration	no alteration	no alteration	no alteration	no alteration	no alteration	no alteration	no alteration	70.9	N/A	N/A	Fluke-Neg	II	Intrahepatic
chol_icgc_2017	CCA_JP_207	1	E204Wfs*41 (driver)	no alteration	G12D (driver)	no alteration	no alteration	no alteration	no alteration	no alteration	no alteration	no alteration	no alteration	no alteration	no alteration	no alteration	no alteration	no alteration	no alteration	no alteration	11.1333	N/A	N/A	Fluke-Neg	IVA	Intrahepatic
chol_icgc_2017	CCA_JP_208	1	R282W (driver)	no alteration	no alteration	L13P	no alteration	no alteration	no alteration	A102T	no alteration	no alteration	no alteration	no alteration	no alteration	no alteration	no alteration	no alteration	no alteration	no alteration	32.5333	N/A	N/A	Fluke-Neg	II	Distal
chol_icgc_2017	CCA_JP_209	0	no alteration	no alteration	no alteration	no alteration	no alteration	no alteration	no alteration	no alteration	no alteration	no alteration	no alteration	no alteration	no alteration	no alteration	no alteration	no alteration	no alteration	no alteration	21.4333	N/A	N/A	Fluke-Neg	IVA	Perihilar
chol_icgc_2017	CCA_JP_21	0	N/A	N/A	N/A	N/A	N/A	N/A	N/A	N/A	N/A	N/A	N/A	N/A	N/A	N/A	N/A	N/A	N/A	N/A	19.4333	N/A	N/A	Fluke-Neg	IIIB	Intrahepatic
chol_icgc_2017	CCA_JP_210	1	no alteration	no alteration	G12D (driver)	no alteration	no alteration	no alteration	no alteration	no alteration	no alteration	no alteration	no alteration	no alteration	no alteration	no alteration	no alteration	no alteration	no alteration	no alteration	1.7	N/A	N/A	Fluke-Neg	N/A	Intrahepatic
chol_icgc_2017	CCA_JP_22	1	no alteration	no alteration	no alteration	no alteration	no alteration	R38C (driver)	no alteration	no alteration	no alteration	no alteration	no alteration	no alteration	no alteration	no alteration	no alteration	no alteration	no alteration	no alteration	17.7333	N/A	N/A	Fluke-Neg	IVA	Intrahepatic
chol_icgc_2017	CCA_JP_23	1	S241F (driver)	no alteration	no alteration	no alteration	no alteration	no alteration	no alteration	no alteration	G660D (driver)	no alteration	no alteration	no alteration	no alteration	no alteration	no alteration	no alteration	no alteration	no alteration	96.0667	N/A	N/A	Fluke-Neg	IIB	Intrahepatic
chol_icgc_2017	CCA_JP_24	1	no alteration	no alteration	no alteration	no alteration	no alteration	no alteration	no alteration	no alteration	no alteration	no alteration	no alteration	no alteration	no alteration	S460Vfs*20 (driver)	no alteration	no alteration	no alteration	no alteration	54.1333	N/A	N/A	Fluke-Neg	II	Distal
chol_icgc_2017	CCA_JP_25	1	no alteration	no alteration	no alteration	no alteration	no alteration	no alteration	no alteration	no alteration	no alteration	no alteration	no alteration	no alteration	no alteration	no alteration	no alteration	no alteration	Q61K (driver)	no alteration	6.03333	N/A	N/A	Fluke-Neg	II	Intrahepatic
chol_icgc_2017	CCA_JP_26	1	R342* (driver)	no alteration	no alteration	no alteration	no alteration	no alteration	no alteration	no alteration	no alteration	no alteration	no alteration	no alteration	no alteration	no alteration	no alteration	no alteration	no alteration	no alteration	16.3	N/A	N/A	Fluke-Neg	IIB	Intrahepatic
chol_icgc_2017	CCA_JP_27	1	R306* (driver)	no alteration	G12D (driver)	no alteration	no alteration	no alteration	no alteration	no alteration	no alteration	no alteration	no alteration	no alteration	no alteration	no alteration	no alteration	no alteration	no alteration	no alteration	9.96667	N/A	N/A	Fluke-Neg	IVA	Intrahepatic
chol_icgc_2017	CCA_JP_28	0	N/A	N/A	N/A	N/A	N/A	N/A	N/A	N/A	N/A	N/A	N/A	N/A	N/A	N/A	N/A	N/A	N/A	N/A	79.4	N/A	N/A	Fluke-Neg	III	Intrahepatic
chol_icgc_2017	CCA_JP_29	0	no alteration	no alteration	no alteration	no alteration	no alteration	no alteration	no alteration	no alteration	no alteration	no alteration	no alteration	no alteration	no alteration	no alteration	no alteration	no alteration	no alteration	no alteration	80.7667	N/A	N/A	Fluke-Neg	I	Perihilar
chol_icgc_2017	CCA_JP_3	1	no alteration	E1444* (driver)	no alteration	no alteration	no alteration	no alteration	no alteration	no alteration	no alteration	no alteration	no alteration	no alteration	no alteration	no alteration	no alteration	no alteration	no alteration	no alteration	58.5333	LIVING	60	Fluke-Neg	II	Intrahepatic
chol_icgc_2017	CCA_JP_30	1	I254T (driver)	no alteration	no alteration	no alteration	no alteration	no alteration	no alteration	no alteration	no alteration	no alteration	no alteration	no alteration	no alteration	no alteration	no alteration	no alteration	no alteration	no alteration	77.3	N/A	N/A	Fluke-Neg	IIA	Intrahepatic
chol_icgc_2017	CCA_JP_31	0	no alteration	no alteration	no alteration	no alteration	no alteration	no alteration	no alteration	no alteration	no alteration	no alteration	no alteration	no alteration	no alteration	no alteration	no alteration	no alteration	no alteration	no alteration	10.6333	N/A	N/A	Fluke-Neg	II	Intrahepatic
chol_icgc_2017	CCA_JP_32	0	N/A	N/A	N/A	N/A	N/A	N/A	N/A	N/A	N/A	N/A	N/A	N/A	N/A	N/A	N/A	N/A	N/A	N/A	76.1333	N/A	N/A	Fluke-Neg	I	Intrahepatic
chol_icgc_2017	CCA_JP_33	1	R175H (driver)	no alteration	G12V (driver)	no alteration	no alteration	no alteration	no alteration	no alteration	no alteration	no alteration	no alteration	no alteration	no alteration	no alteration	no alteration	no alteration	no alteration	no alteration	13.4	N/A	N/A	Fluke-Neg	IVA	Intrahepatic
chol_icgc_2017	CCA_JP_34	0	N/A	N/A	N/A	N/A	N/A	N/A	N/A	N/A	N/A	N/A	N/A	N/A	N/A	N/A	N/A	N/A	N/A	N/A	74.1	N/A	N/A	Fluke-Neg	I	Distal
chol_icgc_2017	CCA_JP_35	1	Q167* (driver)	no alteration	no alteration	no alteration	no alteration	no alteration	no alteration	no alteration	no alteration	no alteration	no alteration	no alteration	no alteration	no alteration	no alteration	no alteration	no alteration	no alteration	61.6333	N/A	N/A	Fluke-Neg	IVA	Intrahepatic
chol_icgc_2017	CCA_JP_36	1	no alteration	no alteration	no alteration	no alteration	no alteration	no alteration	no alteration	no alteration	no alteration	no alteration	no alteration	no alteration	no alteration	no alteration	no alteration	no alteration	G12D (driver)	no alteration	73.4667	N/A	N/A	Fluke-Neg	IVA	Intrahepatic
chol_icgc_2017	CCA_JP_37	1	I195T (driver)	no alteration	G12D (driver)	no alteration	no alteration	no alteration	no alteration	no alteration	no alteration	no alteration	no alteration	no alteration	no alteration	no alteration	no alteration	no alteration	no alteration	no alteration	1.76667	N/A	N/A	Fluke-Neg	II	Intrahepatic
chol_icgc_2017	CCA_JP_38	1	no alteration	no alteration	G12V (driver)	no alteration	no alteration	no alteration	no alteration	no alteration	no alteration	no alteration	no alteration	no alteration	no alteration	no alteration	no alteration	no alteration	no alteration	no alteration	86.9333	N/A	N/A	Fluke-Neg	II	Intrahepatic
chol_icgc_2017	CCA_JP_39	1	no alteration	no alteration	no alteration	no alteration	no alteration	no alteration	P145Rfs*10 (driver)	no alteration	no alteration	no alteration	no alteration	no alteration	no alteration	no alteration	no alteration	no alteration	no alteration	no alteration	29.4	N/A	N/A	Fluke-Neg	II	Intrahepatic
chol_icgc_2017	CCA_JP_4	1	no alteration	E1864Afs*36 (driver)	no alteration	no alteration	no alteration	no alteration	no alteration	no alteration	no alteration	no alteration	no alteration	no alteration	no alteration	no alteration	no alteration	no alteration	no alteration	no alteration	4.46667	LIVING	72	Fluke-Neg	IVA	Intrahepatic
chol_icgc_2017	CCA_JP_40	1	no alteration	no alteration	no alteration	no alteration	F264Rfs*22 (driver)	no alteration	no alteration	no alteration	no alteration	no alteration	no alteration	no alteration	no alteration	no alteration	no alteration	no alteration	no alteration	no alteration	24.9667	N/A	N/A	Fluke-Neg	IVA	Intrahepatic
chol_icgc_2017	CCA_JP_41	1	R306* (driver)	no alteration	no alteration	no alteration	no alteration	no alteration	no alteration	no alteration	no alteration	no alteration	D594A (driver)	no alteration	no alteration	no alteration	X267_splice (driver), Y138D	no alteration	no alteration	no alteration	11.8333	N/A	N/A	Fluke-Neg	II	Intrahepatic
chol_icgc_2017	CCA_JP_42	1	E258G (driver)	no alteration	no alteration	no alteration	no alteration	no alteration	no alteration	no alteration	no alteration	no alteration	no alteration	no alteration	no alteration	no alteration	no alteration	no alteration	no alteration	no alteration	22.4	N/A	N/A	Fluke-Neg	IIB	Intrahepatic
chol_icgc_2017	CCA_JP_43	1	no alteration	P886Hfs*5 (driver)	no alteration	no alteration	no alteration	no alteration	no alteration	no alteration	no alteration	no alteration	no alteration	no alteration	no alteration	no alteration	no alteration	no alteration	no alteration	no alteration	74.4667	N/A	N/A	Fluke-Neg	IVA	Intrahepatic
chol_icgc_2017	CCA_JP_44	1	R248W (driver)	no alteration	G13D (driver)	no alteration	no alteration	no alteration	no alteration	no alteration	no alteration	no alteration	no alteration	no alteration	no alteration	no alteration	no alteration	no alteration	no alteration	no alteration	12.9667	N/A	N/A	Fluke-Neg	IB	Perihilar
chol_icgc_2017	CCA_JP_45	1	X187_splice (driver)	no alteration	no alteration	no alteration	no alteration	Q731R	no alteration	no alteration	no alteration	no alteration	no alteration	no alteration	no alteration	no alteration	no alteration	no alteration	G12D (driver)	no alteration	23.7333	N/A	N/A	Fluke-Neg	IVA	Intrahepatic
chol_icgc_2017	CCA_JP_46	0	N/A	N/A	N/A	N/A	N/A	N/A	N/A	N/A	N/A	N/A	N/A	N/A	N/A	N/A	N/A	N/A	N/A	N/A	111.233	N/A	N/A	Fluke-Neg	IIIA	Intrahepatic
chol_icgc_2017	CCA_JP_47	0	no alteration	no alteration	no alteration	no alteration	no alteration	no alteration	no alteration	no alteration	no alteration	no alteration	no alteration	no alteration	no alteration	no alteration	no alteration	no alteration	no alteration	no alteration	59.7	N/A	N/A	Fluke-Neg	IVA	Distal
chol_icgc_2017	CCA_JP_48	0	no alteration	no alteration	no alteration	no alteration	no alteration	no alteration	no alteration	no alteration	no alteration	no alteration	no alteration	no alteration	no alteration	no alteration	no alteration	no alteration	no alteration	no alteration	21.8	N/A	N/A	Fluke-Neg	IVA	Intrahepatic
chol_icgc_2017	CCA_JP_49	0	no alteration	no alteration	no alteration	no alteration	no alteration	no alteration	no alteration	no alteration	no alteration	no alteration	no alteration	no alteration	no alteration	no alteration	no alteration	no alteration	no alteration	no alteration	102.7	N/A	N/A	Fluke-Neg	IVA	Distal
chol_icgc_2017	CCA_JP_5	1	no alteration	no alteration	no alteration	no alteration	no alteration	H1047L (driver)	no alteration	no alteration	no alteration	no alteration	no alteration	no alteration	Y375C (driver)	no alteration	no alteration	no alteration	no alteration	no alteration	15.0667	DECEASED	62	Fluke-Neg	IVA	Distal
chol_icgc_2017	CCA_JP_50	0	N/A	N/A	N/A	N/A	N/A	N/A	N/A	N/A	N/A	N/A	N/A	N/A	N/A	N/A	N/A	N/A	N/A	N/A	76.2667	N/A	N/A	Fluke-Neg	I	Perihilar
chol_icgc_2017	CCA_JP_51	0	no alteration	no alteration	no alteration	no alteration	no alteration	no alteration	no alteration	no alteration	no alteration	no alteration	no alteration	no alteration	no alteration	no alteration	no alteration	no alteration	no alteration	no alteration	16.7	N/A	N/A	Fluke-Neg	IIA	Perihilar
chol_icgc_2017	CCA_JP_52	0	no alteration	no alteration	no alteration	no alteration	no alteration	no alteration	no alteration	no alteration	no alteration	no alteration	no alteration	no alteration	no alteration	no alteration	no alteration	no alteration	no alteration	no alteration	65.9	N/A	N/A	Fluke-Neg	IVA	Perihilar
chol_icgc_2017	CCA_JP_53	0	no alteration	no alteration	no alteration	no alteration	no alteration	no alteration	no alteration	no alteration	no alteration	no alteration	no alteration	no alteration	no alteration	no alteration	no alteration	no alteration	no alteration	no alteration	36.4667	N/A	N/A	Fluke-Neg	III	Intrahepatic
chol_icgc_2017	CCA_JP_54	1	no alteration	no alteration	Q61H (driver)	no alteration	no alteration	no alteration	no alteration	no alteration	no alteration	no alteration	no alteration	no alteration	no alteration	no alteration	no alteration	no alteration	no alteration	no alteration	97.1333	N/A	N/A	Fluke-Neg	I	Perihilar
chol_icgc_2017	CCA_JP_55	0	no alteration	no alteration	no alteration	no alteration	no alteration	no alteration	no alteration	no alteration	no alteration	no alteration	no alteration	no alteration	no alteration	no alteration	no alteration	no alteration	no alteration	no alteration	97.3333	N/A	N/A	Fluke-Neg	IB	Intrahepatic
chol_icgc_2017	CCA_JP_56	1	I232T (driver)	no alteration	no alteration	P460Rfs*33, T526M	no alteration	no alteration	no alteration	no alteration	no alteration	no alteration	no alteration	no alteration	no alteration	no alteration	no alteration	no alteration	no alteration	no alteration	95.9667	N/A	N/A	Fluke-Neg	II	Intrahepatic
chol_icgc_2017	CCA_JP_57	0	no alteration	no alteration	no alteration	no alteration	no alteration	no alteration	no alteration	no alteration	no alteration	no alteration	no alteration	no alteration	no alteration	no alteration	no alteration	no alteration	no alteration	no alteration	55.8667	N/A	N/A	Fluke-Neg	I	Intrahepatic
chol_icgc_2017	CCA_JP_58	0	no alteration	no alteration	no alteration	no alteration	no alteration	no alteration	no alteration	no alteration	no alteration	no alteration	no alteration	no alteration	no alteration	no alteration	no alteration	no alteration	no alteration	no alteration	57.4667	N/A	N/A	Fluke-Neg	IIIB	Intrahepatic
chol_icgc_2017	CCA_JP_59	1	no alteration	no alteration	G12V (driver)	no alteration	no alteration	no alteration	no alteration	no alteration	no alteration	no alteration	no alteration	no alteration	no alteration	no alteration	no alteration	no alteration	no alteration	no alteration	92.5333	N/A	N/A	Fluke-Neg	II	Intrahepatic
chol_icgc_2017	CCA_JP_6	1	no alteration	S634* (driver)	no alteration	R244Pfs*39	no alteration	no alteration	no alteration	no alteration	no alteration	no alteration	no alteration	no alteration	no alteration	no alteration	no alteration	no alteration	no alteration	no alteration	19.1333	DECEASED	65	Fluke-Neg	III	Intrahepatic
chol_icgc_2017	CCA_JP_60	0	no alteration	no alteration	no alteration	no alteration	no alteration	no alteration	no alteration	no alteration	no alteration	no alteration	no alteration	no alteration	no alteration	no alteration	no alteration	no alteration	no alteration	no alteration	44.4667	N/A	N/A	Fluke-Neg	II	Intrahepatic
chol_icgc_2017	CCA_JP_61	1	no alteration	no alteration	no alteration	Q515L	no alteration	no alteration	no alteration	no alteration	no alteration	Q1812E	no alteration	no alteration	no alteration	no alteration	no alteration	no alteration	no alteration	no alteration	21.5333	N/A	N/A	Fluke-Neg	IVA	Perihilar
chol_icgc_2017	CCA_JP_62	1	no alteration	no alteration	no alteration	no alteration	no alteration	no alteration	no alteration	W1098C	no alteration	no alteration	no alteration	no alteration	no alteration	Y408* (driver)	no alteration	no alteration	no alteration	no alteration	90.8333	N/A	N/A	Fluke-Neg	IA	Distal
chol_icgc_2017	CCA_JP_63	0	N/A	N/A	N/A	N/A	N/A	N/A	N/A	N/A	N/A	N/A	N/A	N/A	N/A	N/A	N/A	N/A	N/A	N/A	46	N/A	N/A	Fluke-Neg	IVA	Distal
chol_icgc_2017	CCA_JP_64	1	no alteration	D1850Tfs*33 (driver), G276Efs*87 (driver)	no alteration	no alteration	no alteration	no alteration	R903Q	no alteration	no alteration	no alteration	no alteration	no alteration	no alteration	no alteration	no alteration	no alteration	no alteration	T994M	91.8667	N/A	N/A	Fluke-Neg	IVA	Perihilar
chol_icgc_2017	CCA_JP_65	1	no alteration	E1718* (driver)	no alteration	no alteration	no alteration	no alteration	no alteration	no alteration	no alteration	no alteration	no alteration	no alteration	no alteration	no alteration	no alteration	no alteration	no alteration	no alteration	13.7333	N/A	N/A	Fluke-Neg	IVA	Perihilar
chol_icgc_2017	CCA_JP_66	1	no alteration	no alteration	A146T (driver)	no alteration	no alteration	no alteration	no alteration	no alteration	no alteration	no alteration	no alteration	no alteration	no alteration	no alteration	no alteration	no alteration	no alteration	no alteration	97.6333	N/A	N/A	Fluke-Neg	IIB	Intrahepatic
chol_icgc_2017	CCA_JP_67	1	R306* (driver)	no alteration	no alteration	no alteration	no alteration	no alteration	no alteration	no alteration	no alteration	no alteration	no alteration	no alteration	no alteration	no alteration	no alteration	no alteration	no alteration	no alteration	10.9667	N/A	N/A	Fluke-Neg	IIB	Intrahepatic
chol_icgc_2017	CCA_JP_68	1	G245S (driver)	no alteration	G12D (driver)	no alteration	no alteration	no alteration	no alteration	no alteration	no alteration	no alteration	no alteration	no alteration	no alteration	no alteration	no alteration	no alteration	no alteration	no alteration	99.5	N/A	N/A	Fluke-Neg	IIA	Intrahepatic
chol_icgc_2017	CCA_JP_69	1	P142Sfs*26 (driver)	no alteration	no alteration	no alteration	no alteration	no alteration	no alteration	no alteration	no alteration	no alteration	no alteration	no alteration	no alteration	no alteration	no alteration	no alteration	no alteration	no alteration	15.9	N/A	N/A	Fluke-Neg	IIIB	Intrahepatic
chol_icgc_2017	CCA_JP_7	1	no alteration	no alteration	no alteration	no alteration	no alteration	no alteration	no alteration	no alteration	L869R (driver)	no alteration	no alteration	no alteration	no alteration	no alteration	no alteration	no alteration	no alteration	no alteration	14.2667	DECEASED	67	Fluke-Neg	IVA	Intrahepatic
chol_icgc_2017	CCA_JP_70	0	no alteration	no alteration	no alteration	no alteration	no alteration	no alteration	no alteration	no alteration	no alteration	no alteration	no alteration	no alteration	no alteration	no alteration	no alteration	no alteration	no alteration	no alteration	25.5	N/A	N/A	Fluke-Neg	IIB	Intrahepatic
chol_icgc_2017	CCA_JP_71	0	N/A	N/A	N/A	N/A	N/A	N/A	N/A	N/A	N/A	N/A	N/A	N/A	N/A	N/A	N/A	N/A	N/A	N/A	13.5333	N/A	N/A	Fluke-Neg	IIIB	Intrahepatic
chol_icgc_2017	CCA_JP_72	1	no alteration	no alteration	no alteration	no alteration	no alteration	no alteration	no alteration	no alteration	G292R (driver)	no alteration	G466A (driver)	no alteration	no alteration	no alteration	no alteration	no alteration	no alteration	no alteration	30.0667	N/A	N/A	Fluke-Neg	IIA	Intrahepatic
chol_icgc_2017	CCA_JP_73	1	no alteration	no alteration	G12D (driver)	no alteration	no alteration	no alteration	no alteration	no alteration	no alteration	no alteration	no alteration	no alteration	no alteration	no alteration	no alteration	no alteration	no alteration	no alteration	5.43333	N/A	N/A	Fluke-Neg	III	Intrahepatic
chol_icgc_2017	CCA_JP_74	1	no alteration	no alteration	G12V (driver)	no alteration	no alteration	no alteration	no alteration	no alteration	no alteration	no alteration	no alteration	no alteration	no alteration	no alteration	no alteration	no alteration	no alteration	no alteration	71.4333	N/A	N/A	Fluke-Neg	IIIA	Intrahepatic
chol_icgc_2017	CCA_JP_75	0	no alteration	no alteration	no alteration	no alteration	no alteration	no alteration	no alteration	no alteration	no alteration	no alteration	no alteration	no alteration	no alteration	no alteration	no alteration	no alteration	no alteration	no alteration	82.1	N/A	N/A	Fluke-Neg	II	Intrahepatic
chol_icgc_2017	CCA_JP_76	1	no alteration	I1907Sfs*16 (driver)	no alteration	no alteration	no alteration	no alteration	no alteration	no alteration	no alteration	no alteration	no alteration	no alteration	no alteration	no alteration	no alteration	no alteration	no alteration	no alteration	92.9333	N/A	N/A	Fluke-Neg	II	Intrahepatic
chol_icgc_2017	CCA_JP_77	1	no alteration	S1558Cfs*11 (driver)	no alteration	no alteration	no alteration	no alteration	no alteration	no alteration	no alteration	no alteration	no alteration	no alteration	no alteration	no alteration	no alteration	no alteration	no alteration	no alteration	16.2	N/A	N/A	Fluke-Neg	IVA	Intrahepatic
chol_icgc_2017	CCA_JP_78	1	no alteration	no alteration	no alteration	no alteration	no alteration	no alteration	no alteration	no alteration	no alteration	no alteration	no alteration	no alteration	no alteration	X279_splice (driver)	no alteration	no alteration	no alteration	no alteration	61.7667	N/A	N/A	Fluke-Neg	IA	Intrahepatic
chol_icgc_2017	CCA_JP_79	1	R248Q (driver)	D1850Tfs*33 (driver), P886Hfs*5 (driver)	no alteration	no alteration	no alteration	no alteration	no alteration	T2475M	R897W	no alteration	no alteration	no alteration	M640I	N564D (driver)	no alteration	no alteration	no alteration	no alteration	15.8	N/A	N/A	Fluke-Neg	IVA	Intrahepatic
chol_icgc_2017	CCA_JP_8	1	no alteration	S1001Ffs*6 (driver)	G12D (driver)	no alteration	no alteration	no alteration	no alteration	no alteration	no alteration	no alteration	no alteration	no alteration	no alteration	no alteration	no alteration	no alteration	no alteration	no alteration	5.6	DECEASED	66	Fluke-Neg	IVA	Intrahepatic
chol_icgc_2017	CCA_JP_80	1	no alteration	Q557* (driver)	no alteration	no alteration	no alteration	no alteration	no alteration	no alteration	no alteration	no alteration	no alteration	no alteration	no alteration	no alteration	no alteration	no alteration	no alteration	no alteration	76.8	N/A	N/A	Fluke-Neg	IIB	Intrahepatic
chol_icgc_2017	CCA_JP_81	1	F134C (driver)	no alteration	G12A (driver)	no alteration	no alteration	no alteration	no alteration	no alteration	no alteration	no alteration	no alteration	no alteration	no alteration	no alteration	no alteration	no alteration	no alteration	no alteration	54.2333	N/A	N/A	Fluke-Neg	IVA	Intrahepatic
chol_icgc_2017	CCA_JP_82	1	no alteration	no alteration	no alteration	no alteration	no alteration	no alteration	no alteration	no alteration	no alteration	no alteration	no alteration	no alteration	no alteration	Y657C	no alteration	no alteration	no alteration	no alteration	60.8333	N/A	N/A	Fluke-Neg	II	Intrahepatic
chol_icgc_2017	CCA_JP_83	0	N/A	N/A	N/A	N/A	N/A	N/A	N/A	N/A	N/A	N/A	N/A	N/A	N/A	N/A	N/A	N/A	N/A	N/A	16.6667	N/A	N/A	Fluke-Neg	IIIB	Intrahepatic
chol_icgc_2017	CCA_JP_84	0	N/A	N/A	N/A	N/A	N/A	N/A	N/A	N/A	N/A	N/A	N/A	N/A	N/A	N/A	N/A	N/A	N/A	N/A	28.1333	N/A	N/A	Fluke-Neg	IIB	Intrahepatic
chol_icgc_2017	CCA_JP_85	0	no alteration	no alteration	no alteration	no alteration	no alteration	no alteration	no alteration	no alteration	no alteration	no alteration	no alteration	no alteration	no alteration	no alteration	no alteration	no alteration	no alteration	no alteration	5.2	N/A	N/A	Fluke-Neg	IVA	Intrahepatic
chol_icgc_2017	CCA_JP_86	0	no alteration	no alteration	no alteration	no alteration	no alteration	no alteration	no alteration	no alteration	no alteration	no alteration	no alteration	no alteration	no alteration	no alteration	no alteration	no alteration	no alteration	no alteration	57.4	N/A	N/A	Fluke-Neg	II	Intrahepatic
chol_icgc_2017	CCA_JP_87	0	no alteration	no alteration	no alteration	no alteration	no alteration	no alteration	no alteration	no alteration	no alteration	no alteration	no alteration	no alteration	no alteration	no alteration	no alteration	no alteration	no alteration	no alteration	6.03333	N/A	N/A	Fluke-Neg	IVA	Intrahepatic
chol_icgc_2017	CCA_JP_88	0	N/A	N/A	N/A	N/A	N/A	N/A	N/A	N/A	N/A	N/A	N/A	N/A	N/A	N/A	N/A	N/A	N/A	N/A	45.0667	N/A	N/A	Fluke-Neg	IVA	Intrahepatic
chol_icgc_2017	CCA_JP_89	1	no alteration	no alteration	no alteration	S419*	no alteration	no alteration	no alteration	no alteration	no alteration	no alteration	L597V (driver)	no alteration	no alteration	no alteration	no alteration	no alteration	Q61R (driver)	no alteration	61.1667	N/A	N/A	Fluke-Neg	II	Distal
chol_icgc_2017	CCA_JP_9	1	R248L (driver), P72R	no alteration	no alteration	no alteration	no alteration	no alteration	no alteration	no alteration	no alteration	no alteration	no alteration	no alteration	no alteration	no alteration	no alteration	no alteration	Q61K (driver)	no alteration	3	DECEASED	60	Fluke-Neg	II	Perihilar
chol_icgc_2017	CCA_JP_90	0	N/A	N/A	N/A	N/A	N/A	N/A	N/A	N/A	N/A	N/A	N/A	N/A	N/A	N/A	N/A	N/A	N/A	N/A	25.1667	N/A	N/A	Fluke-Neg	IIA	Intrahepatic
chol_icgc_2017	CCA_JP_91	1	Q331* (driver)	no alteration	G12V (driver)	no alteration	no alteration	no alteration	no alteration	no alteration	no alteration	no alteration	no alteration	no alteration	no alteration	no alteration	no alteration	no alteration	no alteration	no alteration	5.8	N/A	N/A	Fluke-Neg	IVA	Intrahepatic
chol_icgc_2017	CCA_JP_92	1	no alteration	V161A	no alteration	no alteration	no alteration	no alteration	no alteration	no alteration	no alteration	no alteration	no alteration	no alteration	no alteration	no alteration	no alteration	no alteration	no alteration	no alteration	25.4	N/A	N/A	Fluke-Neg	II	Intrahepatic
chol_icgc_2017	CCA_JP_93	1	X307_splice (driver), A307V	no alteration	G12D (driver)	no alteration	no alteration	no alteration	no alteration	no alteration	no alteration	no alteration	no alteration	no alteration	no alteration	no alteration	no alteration	no alteration	no alteration	no alteration	5.83333	N/A	N/A	Fluke-Neg	IVA	Distal
chol_icgc_2017	CCA_JP_94	0	no alteration	no alteration	no alteration	no alteration	no alteration	no alteration	no alteration	no alteration	no alteration	no alteration	no alteration	no alteration	no alteration	no alteration	no alteration	no alteration	no alteration	no alteration	13.1	N/A	N/A	Fluke-Neg	IIA	Perihilar
chol_icgc_2017	CCA_JP_95	0	N/A	N/A	N/A	N/A	N/A	N/A	N/A	N/A	N/A	N/A	N/A	N/A	N/A	N/A	N/A	N/A	N/A	N/A	3	N/A	N/A	Fluke-Neg	II	Intrahepatic
chol_icgc_2017	CCA_JP_96	1	no alteration	no alteration	no alteration	Y473Tfs*20	no alteration	no alteration	no alteration	no alteration	no alteration	no alteration	no alteration	no alteration	no alteration	no alteration	no alteration	no alteration	no alteration	no alteration	72.4	N/A	N/A	Fluke-Neg	II	Intrahepatic
chol_icgc_2017	CCA_JP_97	1	no alteration	I1943Lfs*13 (driver)	no alteration	no alteration	no alteration	no alteration	no alteration	no alteration	no alteration	no alteration	no alteration	no alteration	no alteration	no alteration	no alteration	no alteration	no alteration	no alteration	7.5	N/A	N/A	Fluke-Neg	IVA	Intrahepatic
chol_icgc_2017	CCA_JP_98	1	no alteration	no alteration	no alteration	no alteration	I99Ffs*4 (driver)	no alteration	no alteration	no alteration	no alteration	no alteration	no alteration	no alteration	no alteration	no alteration	no alteration	no alteration	no alteration	no alteration	56.1333	N/A	N/A	Fluke-Neg	II	Intrahepatic
chol_icgc_2017	CCA_JP_99	1	no alteration	no alteration	no alteration	no alteration	no alteration	no alteration	no alteration	no alteration	no alteration	no alteration	no alteration	no alteration	no alteration	no alteration	no alteration	no alteration	Q61R (driver)	no alteration	71.1333	N/A	N/A	Fluke-Neg	III	Intrahepatic
chol_icgc_2017	CCA_KR_1	0	N/A	N/A	N/A	N/A	N/A	N/A	N/A	N/A	N/A	N/A	N/A	N/A	N/A	N/A	N/A	N/A	N/A	N/A	34.7333	LIVING	63	Fluke-Neg	N/A	Intrahepatic
chol_icgc_2017	CCA_KR_2	1	no alteration	S486Vfs*123 (driver)	G12V (driver)	no alteration	no alteration	no alteration	no alteration	no alteration	no alteration	no alteration	no alteration	no alteration	no alteration	no alteration	no alteration	no alteration	no alteration	D59E	25.9	DECEASED	70	Fluke-Neg	N/A	Intrahepatic
chol_icgc_2017	CCA_RO_1	1	R273H (driver)	no alteration	G13D (driver)	no alteration	no alteration	no alteration	no alteration	no alteration	no alteration	no alteration	no alteration	no alteration	no alteration	no alteration	no alteration	no alteration	no alteration	no alteration	7.06667	DECEASED	45	Fluke-Neg	N/A	Intrahepatic
chol_icgc_2017	CCA_RO_10	0	N/A	N/A	N/A	N/A	N/A	N/A	N/A	N/A	N/A	N/A	N/A	N/A	N/A	N/A	N/A	N/A	N/A	N/A	28.2667	LIVING	61	Fluke-Neg	III	Perihilar
chol_icgc_2017	CCA_RO_11	0	N/A	N/A	N/A	N/A	N/A	N/A	N/A	N/A	N/A	N/A	N/A	N/A	N/A	N/A	N/A	N/A	N/A	N/A	0.2	DECEASED	45	Fluke-Neg	IVB	Perihilar
chol_icgc_2017	CCA_RO_12	0	N/A	N/A	N/A	N/A	N/A	N/A	N/A	N/A	N/A	N/A	N/A	N/A	N/A	N/A	N/A	N/A	N/A	N/A	0.5	DECEASED	63	Fluke-Neg	IVB	Intrahepatic
chol_icgc_2017	CCA_RO_13	1	S241del (driver)	no alteration	no alteration	no alteration	no alteration	no alteration	no alteration	no alteration	no alteration	no alteration	no alteration	no alteration	no alteration	no alteration	no alteration	no alteration	no alteration	no alteration	22.3333	DECEASED	68	Fluke-Neg	IA	Intrahepatic
chol_icgc_2017	CCA_RO_14	1	no alteration	Q1172* (driver)	no alteration	no alteration	no alteration	no alteration	no alteration	no alteration	no alteration	no alteration	no alteration	no alteration	no alteration	no alteration	no alteration	no alteration	no alteration	no alteration	14.0667	DECEASED	70	Fluke-Neg	IIB	Intrahepatic
chol_icgc_2017	CCA_RO_15	0	no alteration	no alteration	no alteration	no alteration	no alteration	no alteration	no alteration	no alteration	no alteration	no alteration	no alteration	no alteration	no alteration	no alteration	no alteration	no alteration	no alteration	no alteration	57.4	LIVING	61	Fluke-Neg	IIIA	Distal
chol_icgc_2017	CCA_RO_16	1	no alteration	Y229Cfs*172 (driver), F1354Yfs*116 (driver)	no alteration	no alteration	no alteration	no alteration	no alteration	no alteration	no alteration	no alteration	no alteration	no alteration	no alteration	no alteration	no alteration	no alteration	no alteration	no alteration	50.4333	DECEASED	58	Fluke-Neg	IIB	Perihilar
chol_icgc_2017	CCA_RO_17	1	no alteration	no alteration	no alteration	no alteration	no alteration	no alteration	no alteration	no alteration	R678Q (driver)	no alteration	no alteration	no alteration	no alteration	no alteration	no alteration	no alteration	no alteration	no alteration	25.1667	DECEASED	61	Fluke-Neg	IIIA	Distal
chol_icgc_2017	CCA_RO_18	0	no alteration	no alteration	no alteration	no alteration	no alteration	no alteration	no alteration	no alteration	no alteration	no alteration	no alteration	no alteration	no alteration	no alteration	no alteration	no alteration	no alteration	no alteration	6.33333	DECEASED	66	Fluke-Neg	N/A	Intrahepatic
chol_icgc_2017	CCA_RO_19	1	R273L (driver)	no alteration	G12V (driver)	no alteration	no alteration	no alteration	no alteration	no alteration	no alteration	no alteration	no alteration	no alteration	no alteration	no alteration	no alteration	no alteration	no alteration	no alteration	17.9667	DECEASED	66	Fluke-Neg	N/A	Intrahepatic
chol_icgc_2017	CCA_RO_2	1	V272L (driver)	no alteration	G12D (driver)	no alteration	no alteration	no alteration	no alteration	no alteration	no alteration	no alteration	no alteration	no alteration	no alteration	no alteration	no alteration	no alteration	no alteration	no alteration	20.1	DECEASED	49	Fluke-Neg	IV	Perihilar
chol_icgc_2017	CCA_RO_20	0	no alteration	no alteration	no alteration	no alteration	no alteration	no alteration	no alteration	no alteration	no alteration	no alteration	no alteration	no alteration	no alteration	no alteration	no alteration	no alteration	no alteration	no alteration	66.2	LIVING	65	Fluke-Neg	IA	Distal
chol_icgc_2017	CCA_RO_21	1	E286V (driver)	no alteration	G12D (driver)	no alteration	no alteration	no alteration	no alteration	no alteration	no alteration	no alteration	no alteration	no alteration	no alteration	no alteration	no alteration	D1028N	no alteration	no alteration	8.56667	DECEASED	75	Fluke-Neg	N/A	Distal
chol_icgc_2017	CCA_RO_22	1	no alteration	no alteration	no alteration	no alteration	no alteration	H1047L (driver)	no alteration	no alteration	no alteration	no alteration	no alteration	no alteration	no alteration	no alteration	no alteration	no alteration	no alteration	no alteration	19.4	DECEASED	59	Fluke-Neg	IA	Perihilar
chol_icgc_2017	CCA_RO_23	0	no alteration	no alteration	no alteration	no alteration	no alteration	no alteration	no alteration	no alteration	no alteration	no alteration	no alteration	no alteration	no alteration	no alteration	no alteration	no alteration	no alteration	no alteration	10.0333	DECEASED	53	Fluke-Neg	III	Distal
chol_icgc_2017	CCA_RO_24	0	N/A	N/A	N/A	N/A	N/A	N/A	N/A	N/A	N/A	N/A	N/A	N/A	N/A	N/A	N/A	N/A	N/A	N/A	20.9667	DECEASED	51	Fluke-Neg	IIIB	Distal
chol_icgc_2017	CCA_RO_25	1	no alteration	R1446* (driver)	no alteration	no alteration	no alteration	no alteration	no alteration	no alteration	no alteration	no alteration	no alteration	no alteration	no alteration	no alteration	no alteration	no alteration	no alteration	no alteration	12.0667	DECEASED	78	Fluke-Neg	N/A	Intrahepatic
chol_icgc_2017	CCA_RO_26	0	no alteration	no alteration	no alteration	no alteration	no alteration	no alteration	no alteration	no alteration	no alteration	no alteration	no alteration	no alteration	no alteration	no alteration	no alteration	no alteration	no alteration	no alteration	44.7667	DECEASED	30	Fluke-Neg	I	Intrahepatic
chol_icgc_2017	CCA_RO_27	0	no alteration	no alteration	no alteration	no alteration	no alteration	no alteration	no alteration	no alteration	no alteration	no alteration	no alteration	no alteration	no alteration	no alteration	no alteration	no alteration	no alteration	no alteration	5.56667	DECEASED	75	Fluke-Neg	N/A	Perihilar
chol_icgc_2017	CCA_RO_28	0	N/A	N/A	N/A	N/A	N/A	N/A	N/A	N/A	N/A	N/A	N/A	N/A	N/A	N/A	N/A	N/A	N/A	N/A	14.0667	DECEASED	49	Fluke-Neg	N/A	Intrahepatic
chol_icgc_2017	CCA_RO_29	1	P27Lfs*17 (driver)	no alteration	no alteration	no alteration	no alteration	no alteration	no alteration	A137T	no alteration	I534F	no alteration	no alteration	no alteration	no alteration	no alteration	no alteration	no alteration	no alteration	40.3333	DECEASED	72	Fluke-Neg	II	Perihilar
chol_icgc_2017	CCA_RO_3	1	R306* (driver)	Q1650* (driver)	no alteration	P460Rfs*33	no alteration	no alteration	R283C	no alteration	no alteration	no alteration	no alteration	no alteration	no alteration	no alteration	no alteration	no alteration	no alteration	no alteration	3.1	DECEASED	46	Fluke-Neg	IIB	Perihilar
chol_icgc_2017	CCA_RO_30	0	no alteration	no alteration	no alteration	no alteration	no alteration	no alteration	no alteration	no alteration	no alteration	no alteration	no alteration	no alteration	no alteration	no alteration	no alteration	no alteration	no alteration	no alteration	9	DECEASED	72	Fluke-Neg	IVA	Perihilar
chol_icgc_2017	CCA_RO_31	1	no alteration	no alteration	no alteration	no alteration	no alteration	no alteration	no alteration	no alteration	S310Y (driver)	no alteration	no alteration	no alteration	no alteration	no alteration	no alteration	no alteration	no alteration	no alteration	24.5	DECEASED	58	Fluke-Neg	IIB	Intrahepatic
chol_icgc_2017	CCA_RO_32	0	N/A	N/A	N/A	N/A	N/A	N/A	N/A	N/A	N/A	N/A	N/A	N/A	N/A	N/A	N/A	N/A	N/A	N/A	80.0333	LIVING	61	Fluke-Neg	IB	Perihilar
chol_icgc_2017	CCA_RO_33	1	H179R (driver)	no alteration	no alteration	no alteration	no alteration	no alteration	no alteration	no alteration	no alteration	no alteration	no alteration	no alteration	no alteration	no alteration	no alteration	no alteration	no alteration	no alteration	63.0667	DECEASED	69	Fluke-Neg	IA	Intrahepatic
chol_icgc_2017	CCA_RO_34	0	no alteration	no alteration	no alteration	no alteration	no alteration	no alteration	no alteration	no alteration	no alteration	no alteration	no alteration	no alteration	no alteration	no alteration	no alteration	no alteration	no alteration	no alteration	39.1	LIVING	50	Fluke-Neg	N/A	Intrahepatic
chol_icgc_2017	CCA_RO_35	1	no alteration	N917Ifs*2 (driver)	no alteration	no alteration	no alteration	no alteration	no alteration	no alteration	no alteration	no alteration	no alteration	no alteration	no alteration	no alteration	no alteration	no alteration	no alteration	no alteration	15.7333	DECEASED	62	Fluke-Neg	N/A	Perihilar
chol_icgc_2017	CCA_RO_36	1	no alteration	no alteration	no alteration	no alteration	no alteration	no alteration	no alteration	no alteration	no alteration	no alteration	no alteration	no alteration	no alteration	no alteration	no alteration	no alteration	no alteration	D707N	31.5667	DECEASED	44	Fluke-Neg	III	Perihilar
chol_icgc_2017	CCA_RO_37	1	no alteration	no alteration	no alteration	no alteration	no alteration	H1047R (driver)	no alteration	no alteration	no alteration	no alteration	no alteration	no alteration	no alteration	no alteration	no alteration	no alteration	no alteration	no alteration	0.2	DECEASED	50	Fluke-Neg	N/A	Distal
chol_icgc_2017	CCA_RO_38	0	no alteration	no alteration	no alteration	no alteration	no alteration	no alteration	no alteration	no alteration	no alteration	no alteration	no alteration	no alteration	no alteration	no alteration	no alteration	no alteration	no alteration	no alteration	19.1667	DECEASED	44	Fluke-Neg	IVA	Distal
chol_icgc_2017	CCA_RO_39	0	N/A	N/A	N/A	N/A	N/A	N/A	N/A	N/A	N/A	N/A	N/A	N/A	N/A	N/A	N/A	N/A	N/A	N/A	88.2333	LIVING	31	Fluke-Neg	N/A	Perihilar
chol_icgc_2017	CCA_RO_4	1	R342Efs*3 (driver)	no alteration	Q61H (driver)	no alteration	no alteration	no alteration	no alteration	no alteration	no alteration	no alteration	no alteration	no alteration	no alteration	no alteration	no alteration	no alteration	no alteration	no alteration	N/A	DECEASED	53	Fluke-Neg	N/A	Intrahepatic
chol_icgc_2017	CCA_RO_40	0	no alteration	no alteration	no alteration	no alteration	no alteration	no alteration	no alteration	no alteration	no alteration	no alteration	no alteration	no alteration	no alteration	no alteration	no alteration	no alteration	no alteration	no alteration	93.6333	LIVING	54	Fluke-Neg	IA	Intrahepatic
chol_icgc_2017	CCA_RO_41	0	N/A	N/A	N/A	N/A	N/A	N/A	N/A	N/A	N/A	N/A	N/A	N/A	N/A	N/A	N/A	N/A	N/A	N/A	N/A	N/A	49	Fluke-Neg	N/A	Intrahepatic
chol_icgc_2017	CCA_RO_42	0	N/A	N/A	N/A	N/A	N/A	N/A	N/A	N/A	N/A	N/A	N/A	N/A	N/A	N/A	N/A	N/A	N/A	N/A	50	DECEASED	70	Fluke-Neg	IIA	Intrahepatic
chol_icgc_2017	CCA_RO_43	0	N/A	N/A	N/A	N/A	N/A	N/A	N/A	N/A	N/A	N/A	N/A	N/A	N/A	N/A	N/A	N/A	N/A	N/A	7	DECEASED	40	Fluke-Neg	IVA	Intrahepatic
chol_icgc_2017	CCA_RO_44	0	N/A	N/A	N/A	N/A	N/A	N/A	N/A	N/A	N/A	N/A	N/A	N/A	N/A	N/A	N/A	N/A	N/A	N/A	5.3	DECEASED	61	Fluke-Neg	IVB	Intrahepatic
chol_icgc_2017	CCA_RO_45	0	N/A	N/A	N/A	N/A	N/A	N/A	N/A	N/A	N/A	N/A	N/A	N/A	N/A	N/A	N/A	N/A	N/A	N/A	9.2	DECEASED	69	Fluke-Neg	N/A	Perihilar
chol_icgc_2017	CCA_RO_46	0	N/A	N/A	N/A	N/A	N/A	N/A	N/A	N/A	N/A	N/A	N/A	N/A	N/A	N/A	N/A	N/A	N/A	N/A	13.9667	DECEASED	69	Fluke-Neg	IIB	Intrahepatic
chol_icgc_2017	CCA_RO_5	1	no alteration	G931* (driver)	no alteration	no alteration	no alteration	no alteration	no alteration	no alteration	no alteration	A1478T	no alteration	no alteration	no alteration	no alteration	no alteration	no alteration	no alteration	no alteration	0.3	DECEASED	69	Fluke-Neg	N/A	Distal
chol_icgc_2017	CCA_RO_6	1	no alteration	no alteration	no alteration	no alteration	no alteration	no alteration	no alteration	no alteration	no alteration	no alteration	no alteration	no alteration	no alteration	no alteration	V290* (driver)	no alteration	no alteration	no alteration	N/A	DECEASED	N/A	Fluke-Neg	N/A	Intrahepatic
chol_icgc_2017	CCA_RO_7	0	no alteration	no alteration	no alteration	no alteration	no alteration	no alteration	no alteration	no alteration	no alteration	no alteration	no alteration	no alteration	no alteration	no alteration	no alteration	no alteration	no alteration	no alteration	76.8	DECEASED	68	Fluke-Neg	IA	Intrahepatic
chol_icgc_2017	CCA_RO_8	0	N/A	N/A	N/A	N/A	N/A	N/A	N/A	N/A	N/A	N/A	N/A	N/A	N/A	N/A	N/A	N/A	N/A	N/A	10.8333	DECEASED	47	Fluke-Neg	II	Intrahepatic
chol_icgc_2017	CCA_RO_9	0	no alteration	no alteration	no alteration	no alteration	no alteration	no alteration	no alteration	no alteration	no alteration	no alteration	no alteration	no alteration	no alteration	no alteration	no alteration	no alteration	no alteration	no alteration	43.5667	DECEASED	49	Fluke-Neg	IB	Distal
chol_icgc_2017	CCA_SG_1	1	R158H (driver)	no alteration	no alteration	no alteration	no alteration	no alteration	no alteration	no alteration	no alteration	no alteration	no alteration	no alteration	no alteration	no alteration	no alteration	no alteration	no alteration	no alteration	7.73333	LIVING	73	Fluke-Neg	III	Intrahepatic
chol_icgc_2017	CCA_SG_10	0	no alteration	no alteration	no alteration	no alteration	no alteration	no alteration	no alteration	no alteration	no alteration	no alteration	no alteration	no alteration	no alteration	no alteration	no alteration	no alteration	no alteration	no alteration	28.0333	LIVING	74	Fluke-Neg	I	Intrahepatic
chol_icgc_2017	CCA_SG_11	1	no alteration	no alteration	no alteration	no alteration	no alteration	no alteration	no alteration	no alteration	Y772_A775dup (driver)	no alteration	no alteration	no alteration	no alteration	no alteration	no alteration	no alteration	no alteration	no alteration	17.2333	LIVING	69	Fluke-Neg	IVA	Intrahepatic
chol_icgc_2017	CCA_SG_12	0	no alteration	no alteration	no alteration	no alteration	no alteration	no alteration	no alteration	no alteration	no alteration	no alteration	no alteration	no alteration	no alteration	no alteration	no alteration	no alteration	no alteration	no alteration	51.3333	LIVING	61	Fluke-Neg	I	Intrahepatic
chol_icgc_2017	CCA_SG_13	0	no alteration	no alteration	no alteration	no alteration	no alteration	no alteration	no alteration	no alteration	no alteration	no alteration	no alteration	no alteration	no alteration	no alteration	no alteration	no alteration	no alteration	no alteration	32.7333	LIVING	60	Fluke-Neg	I	Intrahepatic
chol_icgc_2017	CCA_SG_14	0	no alteration	no alteration	no alteration	no alteration	no alteration	no alteration	no alteration	no alteration	no alteration	no alteration	no alteration	no alteration	no alteration	no alteration	no alteration	no alteration	no alteration	no alteration	37.1333	LIVING	61	Fluke-Neg	N/A	Intrahepatic
chol_icgc_2017	CCA_SG_15	1	no alteration	no alteration	no alteration	no alteration	no alteration	no alteration	no alteration	no alteration	no alteration	no alteration	no alteration	no alteration	Y375C (driver)	no alteration	no alteration	no alteration	no alteration	no alteration	33	LIVING	53	Fluke-Neg	III	Extrahepatic
chol_icgc_2017	CCA_SG_16	0	no alteration	no alteration	no alteration	no alteration	no alteration	no alteration	no alteration	no alteration	no alteration	no alteration	no alteration	no alteration	no alteration	no alteration	no alteration	no alteration	no alteration	no alteration	28.9	LIVING	55	Fluke-Neg	III	Intrahepatic
chol_icgc_2017	CCA_SG_17	0	no alteration	no alteration	no alteration	no alteration	no alteration	no alteration	no alteration	no alteration	no alteration	no alteration	no alteration	no alteration	no alteration	no alteration	no alteration	no alteration	no alteration	no alteration	18	DECEASED	77	Fluke-Neg	IVA	Intrahepatic
chol_icgc_2017	CCA_SG_18	1	M237I (driver)	no alteration	no alteration	no alteration	no alteration	no alteration	no alteration	no alteration	no alteration	no alteration	no alteration	no alteration	no alteration	no alteration	no alteration	no alteration	no alteration	no alteration	4.3	LIVING	71	Fluke-Neg	IIA	Intrahepatic
chol_icgc_2017	CCA_SG_19	1	no alteration	no alteration	no alteration	no alteration	no alteration	no alteration	no alteration	no alteration	no alteration	no alteration	no alteration	no alteration	F276C (driver)	no alteration	no alteration	no alteration	no alteration	no alteration	18.4667	LIVING	75	Fluke-Neg	II	Intrahepatic
chol_icgc_2017	CCA_SG_2	1	no alteration	no alteration	no alteration	G89*	no alteration	no alteration	no alteration	no alteration	no alteration	no alteration	no alteration	no alteration	no alteration	no alteration	no alteration	no alteration	no alteration	no alteration	38.4667	LIVING	67	Fluke-Neg	IVA	Intrahepatic
chol_icgc_2017	CCA_SG_20	0	no alteration	no alteration	no alteration	no alteration	no alteration	no alteration	no alteration	no alteration	no alteration	no alteration	no alteration	no alteration	no alteration	no alteration	no alteration	no alteration	no alteration	no alteration	12.7	LIVING	56	Fluke-Neg	I	Intrahepatic
chol_icgc_2017	CCA_SG_21	0	no alteration	no alteration	no alteration	no alteration	no alteration	no alteration	no alteration	no alteration	no alteration	no alteration	no alteration	no alteration	no alteration	no alteration	no alteration	no alteration	no alteration	no alteration	42.0667	LIVING	55	Fluke-Neg	IVA	Intrahepatic
chol_icgc_2017	CCA_SG_22	0	no alteration	no alteration	no alteration	no alteration	no alteration	no alteration	no alteration	no alteration	no alteration	no alteration	no alteration	no alteration	no alteration	no alteration	no alteration	no alteration	no alteration	no alteration	0.533333	DECEASED	65	Fluke-Neg	I	Intrahepatic
chol_icgc_2017	CCA_SG_23	1	R158H (driver)	no alteration	no alteration	H210Pfs*183	no alteration	no alteration	no alteration	no alteration	no alteration	no alteration	no alteration	no alteration	no alteration	no alteration	no alteration	no alteration	no alteration	no alteration	3.3	LIVING	63	Fluke-Neg	IVB	Intrahepatic
chol_icgc_2017	CCA_SG_24	1	G245S (driver)	no alteration	no alteration	no alteration	no alteration	no alteration	no alteration	no alteration	no alteration	no alteration	no alteration	no alteration	no alteration	no alteration	no alteration	no alteration	no alteration	no alteration	17.6	DECEASED	45	Fluke-Neg	IVA	Intrahepatic
chol_icgc_2017	CCA_SG_25	1	no alteration	no alteration	no alteration	no alteration	no alteration	no alteration	no alteration	no alteration	no alteration	no alteration	no alteration	no alteration	no alteration	no alteration	no alteration	no alteration	Q61R (driver)	no alteration	37.6333	LIVING	74	Fluke-Neg	I	Extrahepatic
chol_icgc_2017	CCA_SG_26	0	no alteration	no alteration	no alteration	no alteration	no alteration	no alteration	no alteration	no alteration	no alteration	no alteration	no alteration	no alteration	no alteration	no alteration	no alteration	no alteration	no alteration	no alteration	13.0667	LIVING	42	Fluke-Neg	IV	Intrahepatic
chol_icgc_2017	CCA_SG_27	0	N/A	N/A	N/A	N/A	N/A	N/A	N/A	N/A	N/A	N/A	N/A	N/A	N/A	N/A	N/A	N/A	N/A	N/A	25.7333	DECEASED	52	Fluke-Neg	III	Intrahepatic
chol_icgc_2017	CCA_SG_28	0	no alteration	no alteration	no alteration	no alteration	no alteration	no alteration	no alteration	no alteration	no alteration	no alteration	no alteration	no alteration	no alteration	no alteration	no alteration	no alteration	no alteration	no alteration	35.4667	LIVING	67	Fluke-Neg	I	Intrahepatic
chol_icgc_2017	CCA_SG_29	1	R249S (driver)	no alteration	no alteration	no alteration	no alteration	no alteration	no alteration	no alteration	no alteration	no alteration	no alteration	no alteration	no alteration	no alteration	no alteration	no alteration	no alteration	no alteration	13.5333	LIVING	39	Fluke-Neg	I	Perihilar
chol_icgc_2017	CCA_SG_3	1	no alteration	W1073Mfs*32 (driver)	no alteration	no alteration	no alteration	no alteration	no alteration	no alteration	no alteration	no alteration	no alteration	no alteration	no alteration	no alteration	no alteration	no alteration	no alteration	no alteration	28.6	LIVING	51	Fluke-Neg	I	Intrahepatic
chol_icgc_2017	CCA_SG_30	0	no alteration	no alteration	no alteration	no alteration	no alteration	no alteration	no alteration	no alteration	no alteration	no alteration	no alteration	no alteration	no alteration	no alteration	no alteration	no alteration	no alteration	no alteration	8.06667	LIVING	62	Fluke-Neg	IIB	Perihilar
chol_icgc_2017	CCA_SG_31	0	no alteration	no alteration	no alteration	no alteration	no alteration	no alteration	no alteration	no alteration	no alteration	no alteration	no alteration	no alteration	no alteration	no alteration	no alteration	no alteration	no alteration	no alteration	1.36667	LIVING	51	Fluke-Neg	IVB	Intrahepatic
chol_icgc_2017	CCA_SG_32	0	N/A	N/A	N/A	N/A	N/A	N/A	N/A	N/A	N/A	N/A	N/A	N/A	N/A	N/A	N/A	N/A	N/A	N/A	26.3	LIVING	70	Fluke-Neg	IVA	Perihilar
chol_icgc_2017	CCA_SG_33	0	no alteration	no alteration	no alteration	no alteration	no alteration	no alteration	no alteration	no alteration	no alteration	no alteration	no alteration	no alteration	no alteration	no alteration	no alteration	no alteration	no alteration	no alteration	13.6	DECEASED	68	Fluke-Neg	IIIA	Intrahepatic
chol_icgc_2017	CCA_SG_34	1	no alteration	no alteration	no alteration	no alteration	no alteration	no alteration	no alteration	no alteration	no alteration	no alteration	no alteration	no alteration	S282_N297del (driver)	no alteration	no alteration	no alteration	no alteration	no alteration	20.8	LIVING	35	Fluke-Neg	III	Intrahepatic
chol_icgc_2017	CCA_SG_35	0	no alteration	no alteration	no alteration	no alteration	no alteration	no alteration	no alteration	no alteration	no alteration	no alteration	no alteration	no alteration	no alteration	no alteration	no alteration	no alteration	no alteration	no alteration	16.1	DECEASED	59	Fluke-Neg	IIB	Intrahepatic
chol_icgc_2017	CCA_SG_36	0	no alteration	no alteration	no alteration	no alteration	no alteration	no alteration	no alteration	no alteration	no alteration	no alteration	no alteration	no alteration	no alteration	no alteration	no alteration	no alteration	no alteration	no alteration	11.9	LIVING	59	Fluke-Neg	II	Extrahepatic
chol_icgc_2017	CCA_SG_37	0	no alteration	no alteration	no alteration	no alteration	no alteration	no alteration	no alteration	no alteration	no alteration	no alteration	no alteration	no alteration	no alteration	no alteration	no alteration	no alteration	no alteration	no alteration	1.83333	DECEASED	61	Fluke-Neg	IVA	Intrahepatic
chol_icgc_2017	CCA_SG_38	1	R282W (driver)	no alteration	G12D (driver)	no alteration	no alteration	no alteration	no alteration	R242H	no alteration	no alteration	no alteration	no alteration	no alteration	no alteration	no alteration	no alteration	no alteration	no alteration	7.76667	N/A	46	Fluke-Neg	IVA	Perihilar
chol_icgc_2017	CCA_SG_39	1	no alteration	L2147del	no alteration	no alteration	no alteration	no alteration	no alteration	no alteration	no alteration	no alteration	no alteration	no alteration	no alteration	no alteration	no alteration	no alteration	no alteration	no alteration	8.23333	LIVING	72	Fluke-Neg	IIIA	Perihilar
chol_icgc_2017	CCA_SG_4	0	no alteration	no alteration	no alteration	no alteration	no alteration	no alteration	no alteration	no alteration	no alteration	no alteration	no alteration	no alteration	no alteration	no alteration	no alteration	no alteration	no alteration	no alteration	94.9333	LIVING	61	Fluke-Neg	I	Perihilar
chol_icgc_2017	CCA_SG_40	1	no alteration	Q372Afs*28 (driver)	no alteration	no alteration	no alteration	no alteration	no alteration	no alteration	Y772_A775dup (driver)	no alteration	no alteration	no alteration	no alteration	no alteration	no alteration	no alteration	no alteration	no alteration	17.2333	LIVING	69	Fluke-Neg	N/A	Extrahepatic
chol_icgc_2017	CCA_SG_41	0	no alteration	no alteration	no alteration	no alteration	no alteration	no alteration	no alteration	no alteration	no alteration	no alteration	no alteration	no alteration	no alteration	no alteration	no alteration	no alteration	no alteration	no alteration	94.9333	LIVING	61	Fluke-Neg	N/A	Intrahepatic
chol_icgc_2017	CCA_SG_42	1	K132N (driver)	no alteration	no alteration	S419*, F314L	no alteration	no alteration	no alteration	no alteration	no alteration	P2692L, S1701F	no alteration	P1092S	no alteration	no alteration	no alteration	no alteration	no alteration	no alteration	15.4333	LIVING	71	Fluke-Neg	N/A	Perihilar
chol_icgc_2017	CCA_SG_43	1	no alteration	S658* (driver)	no alteration	R103P	no alteration	no alteration	no alteration	no alteration	no alteration	no alteration	no alteration	no alteration	no alteration	no alteration	no alteration	no alteration	no alteration	no alteration	0.1	DECEASED	70	Fluke-Neg	III	Extrahepatic
chol_icgc_2017	CCA_SG_44	0	N/A	N/A	N/A	N/A	N/A	N/A	N/A	N/A	N/A	N/A	N/A	N/A	N/A	N/A	N/A	N/A	N/A	N/A	3.3	DECEASED	69	Fluke-Neg	IV	Extrahepatic
chol_icgc_2017	CCA_SG_45	0	N/A	N/A	N/A	N/A	N/A	N/A	N/A	N/A	N/A	N/A	N/A	N/A	N/A	N/A	N/A	N/A	N/A	N/A	23.2333	LIVING	50	Fluke-Neg	II	Intrahepatic
chol_icgc_2017	CCA_SG_46	0	N/A	N/A	N/A	N/A	N/A	N/A	N/A	N/A	N/A	N/A	N/A	N/A	N/A	N/A	N/A	N/A	N/A	N/A	16.9333	LIVING	69	Fluke-Neg	II	Intrahepatic
chol_icgc_2017	CCA_SG_47	0	N/A	N/A	N/A	N/A	N/A	N/A	N/A	N/A	N/A	N/A	N/A	N/A	N/A	N/A	N/A	N/A	N/A	N/A	17.3667	N/A	52	Fluke-Neg	I	Perihilar
chol_icgc_2017	CCA_SG_48	0	N/A	N/A	N/A	N/A	N/A	N/A	N/A	N/A	N/A	N/A	N/A	N/A	N/A	N/A	N/A	N/A	N/A	N/A	2.46667	LIVING	77	Fluke-Neg	N/A	Intrahepatic
chol_icgc_2017	CCA_SG_49	0	N/A	N/A	N/A	N/A	N/A	N/A	N/A	N/A	N/A	N/A	N/A	N/A	N/A	N/A	N/A	N/A	N/A	N/A	66.3	LIVING	49	Fluke-Neg	II	Intrahepatic
chol_icgc_2017	CCA_SG_5	1	no alteration	no alteration	G12D (driver)	no alteration	no alteration	no alteration	no alteration	no alteration	no alteration	no alteration	no alteration	no alteration	no alteration	no alteration	no alteration	no alteration	no alteration	no alteration	17.4333	LIVING	78	Fluke-Neg	IVA	Intrahepatic
chol_icgc_2017	CCA_SG_50	0	N/A	N/A	N/A	N/A	N/A	N/A	N/A	N/A	N/A	N/A	N/A	N/A	N/A	N/A	N/A	N/A	N/A	N/A	11.3667	DECEASED	32	Fluke-Neg	IVB	Intrahepatic
chol_icgc_2017	CCA_SG_51	0	N/A	N/A	N/A	N/A	N/A	N/A	N/A	N/A	N/A	N/A	N/A	N/A	N/A	N/A	N/A	N/A	N/A	N/A	13.8333	LIVING	63	Fluke-Neg	II	Intrahepatic
chol_icgc_2017	CCA_SG_52	0	N/A	N/A	N/A	N/A	N/A	N/A	N/A	N/A	N/A	N/A	N/A	N/A	N/A	N/A	N/A	N/A	N/A	N/A	11.6	LIVING	26	Fluke-Neg	II	Perihilar
chol_icgc_2017	CCA_SG_53	0	N/A	N/A	N/A	N/A	N/A	N/A	N/A	N/A	N/A	N/A	N/A	N/A	N/A	N/A	N/A	N/A	N/A	N/A	9.6	DECEASED	47	Fluke-Neg	IIA	Perihilar
chol_icgc_2017	CCA_SG_54	0	N/A	N/A	N/A	N/A	N/A	N/A	N/A	N/A	N/A	N/A	N/A	N/A	N/A	N/A	N/A	N/A	N/A	N/A	7.73333	LIVING	60	Fluke-Neg	IVB	Intrahepatic
chol_icgc_2017	CCA_SG_6	1	no alteration	X911_splice (driver)	no alteration	no alteration	no alteration	no alteration	no alteration	no alteration	no alteration	no alteration	no alteration	no alteration	no alteration	no alteration	no alteration	no alteration	no alteration	no alteration	46.0333	DECEASED	51	Fluke-Neg	I	Intrahepatic
chol_icgc_2017	CCA_SG_7	1	no alteration	Q766Sfs*67 (driver)	no alteration	P460Rfs*33	G163C (driver)	no alteration	N838Mfs*4 (driver), D334Rfs*14 (driver)	no alteration	no alteration	M605V	K483E (driver)	no alteration	no alteration	no alteration	no alteration	no alteration	no alteration	T853M	29.9333	LIVING	68	Fluke-Neg	I	Intrahepatic
chol_icgc_2017	CCA_SG_8	1	no alteration	no alteration	G12D (driver)	no alteration	no alteration	no alteration	no alteration	no alteration	no alteration	no alteration	no alteration	no alteration	no alteration	no alteration	no alteration	no alteration	no alteration	no alteration	71.6667	LIVING	57	Fluke-Neg	I	Perihilar
chol_icgc_2017	CCA_SG_9	1	no alteration	Y551Lfs*72 (driver)	no alteration	E623Afs*3	no alteration	no alteration	no alteration	no alteration	no alteration	no alteration	no alteration	no alteration	Y375C (driver)	no alteration	no alteration	no alteration	no alteration	no alteration	3.03333	DECEASED	60	Fluke-Neg	IVB	Intrahepatic
chol_icgc_2017	CCA_TH_1	1	no alteration	no alteration	no alteration	no alteration	no alteration	E365K (driver)	no alteration	no alteration	no alteration	no alteration	no alteration	no alteration	no alteration	no alteration	no alteration	no alteration	no alteration	no alteration	5.56667	DECEASED	49	Fluke-Pos	III	Intrahepatic
chol_icgc_2017	CCA_TH_10	1	R273H (driver)	no alteration	no alteration	no alteration	no alteration	no alteration	R789* (driver)	no alteration	no alteration	no alteration	no alteration	no alteration	S252W (driver)	no alteration	no alteration	no alteration	no alteration	R130H	38.9333	LIVING	69	Fluke-Pos	IVA	Perihilar
chol_icgc_2017	CCA_TH_100	1	no alteration	no alteration	no alteration	no alteration	X288_splice (driver)	no alteration	no alteration	no alteration	no alteration	no alteration	no alteration	no alteration	no alteration	no alteration	no alteration	no alteration	no alteration	no alteration	23.8	LIVING	54	Fluke-Pos	IVB	Perihilar
chol_icgc_2017	CCA_TH_101	1	no alteration	no alteration	no alteration	no alteration	X97_splice (driver)	no alteration	no alteration	no alteration	no alteration	no alteration	no alteration	no alteration	no alteration	no alteration	no alteration	no alteration	no alteration	no alteration	9.9	DECEASED	70	Fluke-Pos	III	Perihilar
chol_icgc_2017	CCA_TH_102	0	no alteration	no alteration	no alteration	no alteration	no alteration	no alteration	no alteration	no alteration	no alteration	no alteration	no alteration	no alteration	no alteration	no alteration	no alteration	no alteration	no alteration	no alteration	1.66667	DECEASED	66	Fluke-Pos	IVA	Perihilar
chol_icgc_2017	CCA_TH_103	1	R213* (driver)	no alteration	no alteration	no alteration	no alteration	no alteration	no alteration	no alteration	no alteration	no alteration	no alteration	no alteration	no alteration	no alteration	no alteration	no alteration	no alteration	no alteration	2.76667	DECEASED	60	Fluke-Pos	III	Intrahepatic
chol_icgc_2017	CCA_TH_104	1	no alteration	no alteration	no alteration	no alteration	X288_splice (driver)	no alteration	no alteration	no alteration	no alteration	no alteration	no alteration	no alteration	no alteration	no alteration	no alteration	no alteration	no alteration	no alteration	1.13333	DECEASED	57	Fluke-Pos	IVB	Perihilar
chol_icgc_2017	CCA_TH_105	1	no alteration	no alteration	no alteration	no alteration	no alteration	no alteration	no alteration	P268R	no alteration	no alteration	no alteration	no alteration	no alteration	no alteration	no alteration	no alteration	no alteration	D894Y	6.23333	DECEASED	51	Fluke-Pos	III	Intrahepatic
chol_icgc_2017	CCA_TH_106	1	no alteration	no alteration	no alteration	no alteration	no alteration	N345K (driver)	no alteration	no alteration	no alteration	no alteration	no alteration	no alteration	no alteration	no alteration	no alteration	no alteration	no alteration	no alteration	4.96667	DECEASED	64	Fluke-Pos	IIIB	Intrahepatic
chol_icgc_2017	CCA_TH_107	0	no alteration	no alteration	no alteration	no alteration	no alteration	no alteration	no alteration	no alteration	no alteration	no alteration	no alteration	no alteration	no alteration	no alteration	no alteration	no alteration	no alteration	no alteration	14.5	LIVING	61	Fluke-Pos	IIIB	Intrahepatic
chol_icgc_2017	CCA_TH_108	1	C176F (driver)	no alteration	no alteration	no alteration	no alteration	no alteration	no alteration	no alteration	no alteration	no alteration	no alteration	no alteration	no alteration	no alteration	no alteration	no alteration	no alteration	no alteration	13.1	LIVING	70	Fluke-Pos	IVA	Intrahepatic
chol_icgc_2017	CCA_TH_109	1	no alteration	no alteration	no alteration	no alteration	E256* (driver)	no alteration	no alteration	no alteration	no alteration	no alteration	no alteration	no alteration	no alteration	no alteration	no alteration	no alteration	no alteration	no alteration	11.5333	DECEASED	60	Fluke-Pos	IVA	Perihilar
chol_icgc_2017	CCA_TH_11	1	no alteration	no alteration	no alteration	no alteration	Q214Rfs*73 (driver)	no alteration	no alteration	no alteration	no alteration	no alteration	G464V (driver)	no alteration	no alteration	no alteration	no alteration	no alteration	no alteration	no alteration	7.6	DECEASED	79	Fluke-Pos	IVA	Perihilar
chol_icgc_2017	CCA_TH_110	1	no alteration	no alteration	no alteration	no alteration	no alteration	no alteration	no alteration	Q111H	no alteration	no alteration	no alteration	no alteration	no alteration	no alteration	no alteration	no alteration	no alteration	no alteration	10.7	DECEASED	53	Fluke-Pos	III	Intrahepatic
chol_icgc_2017	CCA_TH_111	1	no alteration	no alteration	no alteration	N480Qfs*116	no alteration	D787Y	no alteration	no alteration	no alteration	no alteration	no alteration	no alteration	no alteration	no alteration	no alteration	R538I	no alteration	no alteration	2.4	DECEASED	65	Fluke-Pos	IIIB	Perihilar
chol_icgc_2017	CCA_TH_112	1	R273H (driver)	G1996V, R1989G	no alteration	no alteration	no alteration	no alteration	no alteration	no alteration	no alteration	R2C	no alteration	no alteration	no alteration	no alteration	no alteration	no alteration	no alteration	no alteration	7.26667	LIVING	68	Fluke-Pos	I	Intrahepatic
chol_icgc_2017	CCA_TH_113	0	no alteration	no alteration	no alteration	no alteration	no alteration	no alteration	no alteration	no alteration	no alteration	no alteration	no alteration	no alteration	no alteration	no alteration	no alteration	no alteration	no alteration	no alteration	5.03333	LIVING	42	Fluke-Pos	I	Intrahepatic
chol_icgc_2017	CCA_TH_114	1	no alteration	F1809* (driver)	no alteration	no alteration	no alteration	no alteration	no alteration	no alteration	no alteration	no alteration	no alteration	no alteration	no alteration	no alteration	no alteration	no alteration	no alteration	no alteration	8.36667	DECEASED	49	Fluke-Pos	IIIB	Intrahepatic
chol_icgc_2017	CCA_TH_115	1	E343* (driver)	no alteration	no alteration	no alteration	no alteration	no alteration	no alteration	no alteration	no alteration	no alteration	G469A (driver)	no alteration	no alteration	no alteration	no alteration	no alteration	no alteration	no alteration	7.4	DECEASED	50	Fluke-Pos	III	Intrahepatic
chol_icgc_2017	CCA_TH_116	1	no alteration	X997_splice (driver)	no alteration	E809K	no alteration	no alteration	no alteration	no alteration	S310F (driver)	no alteration	no alteration	no alteration	no alteration	no alteration	no alteration	no alteration	no alteration	no alteration	75.1	DECEASED	52	Fluke-Pos	IVA	Intrahepatic
chol_icgc_2017	CCA_TH_117	1	no alteration	no alteration	no alteration	no alteration	no alteration	no alteration	G89Rfs*22 (driver)	T1325S	no alteration	R1055W	no alteration	no alteration	no alteration	no alteration	no alteration	no alteration	no alteration	no alteration	11.7	DECEASED	42	Fluke-Pos	IIIA	Intrahepatic
chol_icgc_2017	CCA_TH_118	1	F134C (driver)	S1000Y, L1831R, V973E	Q61H (driver)	no alteration	no alteration	R88Q (driver), R349*, S199Y, L1001I	T929P	L1995I, R84L	no alteration	E3061K, S606L, R656C, A2114T, E436*, E1360D, R114I, S2503Y, K1236R, E2052A, D999V	Q356K	S522L, S79Y, X333_splice, E835D	no alteration	R348* (driver)	E299* (driver), R173H (driver), D24Y (driver), N69S	E1097K, D1056Y, K317N	no alteration	R653C	83.1	DECEASED	46	Fluke-Pos	IIIA	Intrahepatic
chol_icgc_2017	CCA_TH_119	1	no alteration	E2034* (driver)	G12S (driver)	no alteration	no alteration	no alteration	no alteration	no alteration	no alteration	no alteration	G469A (driver), D213N	no alteration	no alteration	no alteration	no alteration	no alteration	no alteration	no alteration	4.93333	DECEASED	66	Fluke-Pos	IVA	Perihilar
chol_icgc_2017	CCA_TH_12	1	K132N (driver)	Q840* (driver)	no alteration	N674I	no alteration	no alteration	no alteration	no alteration	no alteration	no alteration	no alteration	no alteration	no alteration	no alteration	Q171* (driver)	no alteration	no alteration	no alteration	10.2333	DECEASED	52	Fluke-Pos	IIIB	Perihilar
chol_icgc_2017	CCA_TH_120	1	R196* (driver)	no alteration	no alteration	no alteration	no alteration	no alteration	no alteration	no alteration	no alteration	no alteration	no alteration	no alteration	no alteration	no alteration	no alteration	no alteration	no alteration	no alteration	62.2667	DECEASED	45	Fluke-Pos	IVA	Perihilar
chol_icgc_2017	CCA_TH_121	1	no alteration	G2087R (driver)	G12C (driver)	no alteration	no alteration	H1047L (driver)	no alteration	no alteration	no alteration	no alteration	no alteration	no alteration	no alteration	no alteration	no alteration	no alteration	no alteration	no alteration	7	DECEASED	70	Fluke-Pos	IVA	Intrahepatic
chol_icgc_2017	CCA_TH_122	1	Y163* (driver)	Y401* (driver)	G12V (driver)	F280Cfs*3	no alteration	no alteration	no alteration	no alteration	no alteration	no alteration	no alteration	Y950H	no alteration	no alteration	no alteration	M869I	no alteration	no alteration	6	DECEASED	50	Fluke-Pos	IVA	Intrahepatic
chol_icgc_2017	CCA_TH_123	1	no alteration	no alteration	no alteration	no alteration	no alteration	no alteration	no alteration	no alteration	no alteration	no alteration	no alteration	X735_splice	no alteration	no alteration	no alteration	no alteration	no alteration	no alteration	43.4	DECEASED	62	Fluke-Pos	IVA	Intrahepatic
chol_icgc_2017	CCA_TH_124	0	no alteration	no alteration	no alteration	no alteration	no alteration	no alteration	no alteration	no alteration	no alteration	no alteration	no alteration	no alteration	no alteration	no alteration	no alteration	no alteration	no alteration	no alteration	14.3	DECEASED	69	Fluke-Pos	IVA	Perihilar
chol_icgc_2017	CCA_TH_125	1	no alteration	no alteration	G13D (driver)	no alteration	no alteration	no alteration	no alteration	no alteration	no alteration	no alteration	no alteration	no alteration	no alteration	no alteration	no alteration	no alteration	no alteration	no alteration	5.23333	DECEASED	51	Fluke-Pos	IVA	Perihilar
chol_icgc_2017	CCA_TH_126	1	R273C (driver)	no alteration	no alteration	no alteration	no alteration	no alteration	no alteration	no alteration	no alteration	no alteration	no alteration	no alteration	no alteration	no alteration	no alteration	no alteration	no alteration	no alteration	25.1333	DECEASED	64	Fluke-Pos	III	Intrahepatic
chol_icgc_2017	CCA_TH_127	1	no alteration	K1161Sfs*19 (driver)	no alteration	no alteration	no alteration	no alteration	no alteration	no alteration	no alteration	no alteration	no alteration	no alteration	no alteration	no alteration	no alteration	no alteration	no alteration	no alteration	20.3	DECEASED	51	Fluke-Pos	IVA	Perihilar
chol_icgc_2017	CCA_TH_128	1	no alteration	X751_splice (driver)	no alteration	G722R	no alteration	G967E	no alteration	no alteration	no alteration	no alteration	no alteration	no alteration	no alteration	no alteration	no alteration	no alteration	no alteration	no alteration	11.3333	DECEASED	55	Fluke-Pos	IVA	Intrahepatic
chol_icgc_2017	CCA_TH_129	1	R273C (driver)	no alteration	G12V (driver)	no alteration	no alteration	no alteration	no alteration	Y355H	no alteration	no alteration	no alteration	no alteration	no alteration	no alteration	no alteration	no alteration	no alteration	no alteration	29.2	DECEASED	69	Fluke-Pos	IVA	Intrahepatic
chol_icgc_2017	CCA_TH_13	1	P72R	Q1066* (driver)	no alteration	P460Rfs*33	no alteration	no alteration	no alteration	no alteration	no alteration	no alteration	no alteration	no alteration	no alteration	no alteration	no alteration	no alteration	G13R (driver)	no alteration	34.2333	LIVING	57	Fluke-Pos	IIIA	Perihilar
chol_icgc_2017	CCA_TH_130	0	N/A	N/A	N/A	N/A	N/A	N/A	N/A	N/A	N/A	N/A	N/A	N/A	N/A	N/A	N/A	N/A	N/A	N/A	N/A	N/A	51	Fluke-Pos	N/A	Perihilar
chol_icgc_2017	CCA_TH_131	0	N/A	N/A	N/A	N/A	N/A	N/A	N/A	N/A	N/A	N/A	N/A	N/A	N/A	N/A	N/A	N/A	N/A	N/A	10.2333	DECEASED	52	Fluke-Pos	IIIB	Intrahepatic
chol_icgc_2017	CCA_TH_132	0	N/A	N/A	N/A	N/A	N/A	N/A	N/A	N/A	N/A	N/A	N/A	N/A	N/A	N/A	N/A	N/A	N/A	N/A	13.8667	DECEASED	57	Fluke-Pos	IVA	Intrahepatic
chol_icgc_2017	CCA_TH_14	1	no alteration	no alteration	G13D (driver)	X327_splice	no alteration	no alteration	no alteration	G924D	no alteration	no alteration	no alteration	no alteration	no alteration	no alteration	Y155C (driver)	no alteration	no alteration	no alteration	3.9	DECEASED	64	Fluke-Pos	III	Intrahepatic
chol_icgc_2017	CCA_TH_15	1	E285K (driver)	R1461* (driver)	no alteration	no alteration	no alteration	no alteration	no alteration	no alteration	no alteration	P950T	no alteration	no alteration	no alteration	no alteration	no alteration	no alteration	no alteration	no alteration	15.8333	DECEASED	37	Fluke-Pos	IIIA	Intrahepatic
chol_icgc_2017	CCA_TH_16	1	S215N (driver)	no alteration	G12D (driver)	no alteration	no alteration	no alteration	no alteration	no alteration	no alteration	no alteration	no alteration	no alteration	no alteration	no alteration	no alteration	no alteration	no alteration	no alteration	4.96667	DECEASED	61	Fluke-Pos	III	Perihilar
chol_icgc_2017	CCA_TH_17	1	R248W (driver)	no alteration	G12A (driver)	no alteration	no alteration	no alteration	no alteration	no alteration	no alteration	no alteration	no alteration	no alteration	no alteration	no alteration	no alteration	no alteration	no alteration	no alteration	2.13333	DECEASED	66	Fluke-Pos	III	Perihilar
chol_icgc_2017	CCA_TH_18	1	T140Dfs*9 (driver), C135Wfs*33 (driver)	no alteration	no alteration	no alteration	no alteration	no alteration	no alteration	no alteration	no alteration	no alteration	no alteration	no alteration	no alteration	no alteration	no alteration	no alteration	no alteration	no alteration	5.23333	DECEASED	56	Fluke-Pos	IVA	Intrahepatic
chol_icgc_2017	CCA_TH_19	1	N239Kfs*25 (driver)	no alteration	no alteration	no alteration	no alteration	no alteration	V545Sfs*6 (driver)	no alteration	no alteration	no alteration	no alteration	no alteration	no alteration	no alteration	no alteration	no alteration	no alteration	no alteration	5.9	DECEASED	65	Fluke-Pos	III	Perihilar
chol_icgc_2017	CCA_TH_2	1	no alteration	no alteration	no alteration	K586N	no alteration	no alteration	no alteration	no alteration	no alteration	no alteration	no alteration	no alteration	no alteration	no alteration	no alteration	no alteration	no alteration	no alteration	20.8333	DECEASED	46	Fluke-Pos	IIIA	Perihilar
chol_icgc_2017	CCA_TH_20	1	no alteration	S607* (driver)	no alteration	A20Rfs*33	no alteration	no alteration	no alteration	no alteration	no alteration	no alteration	no alteration	no alteration	no alteration	no alteration	no alteration	no alteration	no alteration	no alteration	18.5667	DECEASED	63	Fluke-Pos	IVA	Intrahepatic
chol_icgc_2017	CCA_TH_21	0	no alteration	no alteration	no alteration	no alteration	no alteration	no alteration	no alteration	no alteration	no alteration	no alteration	no alteration	no alteration	no alteration	no alteration	no alteration	no alteration	no alteration	no alteration	75.1667	LIVING	40	Fluke-Pos	I	Perihilar
chol_icgc_2017	CCA_TH_22	1	no alteration	no alteration	no alteration	R93Lfs*71	no alteration	no alteration	no alteration	no alteration	no alteration	no alteration	no alteration	no alteration	no alteration	no alteration	no alteration	no alteration	no alteration	no alteration	69.9667	LIVING	56	Fluke-Pos	II	Intrahepatic
chol_icgc_2017	CCA_TH_23	1	no alteration	no alteration	G12D (driver)	no alteration	Q152* (driver)	no alteration	no alteration	no alteration	no alteration	no alteration	no alteration	no alteration	no alteration	no alteration	no alteration	no alteration	no alteration	no alteration	58.6667	DECEASED	56	Fluke-Pos	I	Perihilar
chol_icgc_2017	CCA_TH_24	1	E285K (driver)	no alteration	no alteration	no alteration	no alteration	no alteration	no alteration	no alteration	no alteration	K1847I	no alteration	no alteration	no alteration	no alteration	X212_splice (driver)	no alteration	no alteration	no alteration	28.7333	DECEASED	52	Fluke-Pos	IIIB	Perihilar
chol_icgc_2017	CCA_TH_25	1	G105V (driver)	no alteration	no alteration	no alteration	no alteration	no alteration	no alteration	no alteration	no alteration	no alteration	no alteration	no alteration	no alteration	no alteration	no alteration	no alteration	no alteration	no alteration	31.1667	DECEASED	53	Fluke-Pos	II	Perihilar
chol_icgc_2017	CCA_TH_26	1	L130V (driver)	no alteration	no alteration	no alteration	no alteration	no alteration	no alteration	no alteration	no alteration	no alteration	no alteration	no alteration	no alteration	no alteration	no alteration	no alteration	no alteration	no alteration	17.4333	DECEASED	52	Fluke-Pos	I	Perihilar
chol_icgc_2017	CCA_TH_27	0	no alteration	no alteration	no alteration	no alteration	no alteration	no alteration	no alteration	no alteration	no alteration	no alteration	no alteration	no alteration	no alteration	no alteration	no alteration	no alteration	no alteration	no alteration	37.3	DECEASED	72	Fluke-Pos	IVA	Intrahepatic
chol_icgc_2017	CCA_TH_28	1	I195Sfs*52 (driver)	no alteration	no alteration	no alteration	no alteration	no alteration	no alteration	no alteration	no alteration	no alteration	no alteration	no alteration	no alteration	no alteration	no alteration	no alteration	no alteration	no alteration	31.5	DECEASED	52	Fluke-Pos	IVA	Intrahepatic
chol_icgc_2017	CCA_TH_29	1	L194R (driver)	no alteration	no alteration	no alteration	no alteration	no alteration	no alteration	no alteration	no alteration	no alteration	no alteration	no alteration	no alteration	no alteration	no alteration	no alteration	no alteration	no alteration	2.36667	DECEASED	49	Fluke-Pos	IVB	Intrahepatic
chol_icgc_2017	CCA_TH_3	1	S241P (driver)	no alteration	no alteration	no alteration	no alteration	no alteration	no alteration	no alteration	no alteration	no alteration	no alteration	no alteration	no alteration	no alteration	no alteration	no alteration	no alteration	no alteration	14.6667	DECEASED	76	Fluke-Pos	IIIA	Intrahepatic
chol_icgc_2017	CCA_TH_30	0	no alteration	no alteration	no alteration	no alteration	no alteration	no alteration	no alteration	no alteration	no alteration	no alteration	no alteration	no alteration	no alteration	no alteration	no alteration	no alteration	no alteration	no alteration	18	DECEASED	52	Fluke-Pos	IIIB	Perihilar
chol_icgc_2017	CCA_TH_31	1	no alteration	S634* (driver)	no alteration	no alteration	no alteration	no alteration	no alteration	no alteration	no alteration	no alteration	no alteration	no alteration	no alteration	no alteration	no alteration	no alteration	no alteration	no alteration	5.13333	DECEASED	55	Fluke-Pos	IVA	Perihilar
chol_icgc_2017	CCA_TH_32	1	R273C (driver)	no alteration	no alteration	no alteration	no alteration	no alteration	no alteration	no alteration	no alteration	no alteration	no alteration	no alteration	no alteration	no alteration	no alteration	no alteration	no alteration	no alteration	12.5667	DECEASED	50	Fluke-Pos	IIIB	Intrahepatic
chol_icgc_2017	CCA_TH_33	1	Y327* (driver)	no alteration	no alteration	no alteration	no alteration	no alteration	no alteration	no alteration	no alteration	no alteration	no alteration	no alteration	no alteration	no alteration	no alteration	no alteration	no alteration	no alteration	19.7333	DECEASED	53	Fluke-Pos	IVA	Intrahepatic
chol_icgc_2017	CCA_TH_34	1	H193R (driver)	no alteration	no alteration	no alteration	no alteration	no alteration	no alteration	no alteration	no alteration	no alteration	no alteration	no alteration	no alteration	no alteration	no alteration	no alteration	no alteration	no alteration	10.0667	DECEASED	54	Fluke-Pos	III	Intrahepatic
chol_icgc_2017	CCA_TH_35	1	E286K (driver)	no alteration	no alteration	no alteration	no alteration	no alteration	no alteration	no alteration	no alteration	no alteration	no alteration	no alteration	no alteration	no alteration	no alteration	no alteration	no alteration	no alteration	0.1	DECEASED	76	Fluke-Pos	IVB	Perihilar
chol_icgc_2017	CCA_TH_36	0	N/A	N/A	N/A	N/A	N/A	N/A	N/A	N/A	N/A	N/A	N/A	N/A	N/A	N/A	N/A	N/A	N/A	N/A	13.4	DECEASED	63	Fluke-Pos	II	Intrahepatic
chol_icgc_2017	CCA_TH_37	1	R282W (driver)	no alteration	no alteration	no alteration	no alteration	no alteration	no alteration	no alteration	no alteration	no alteration	no alteration	no alteration	no alteration	no alteration	no alteration	no alteration	no alteration	no alteration	11.9333	DECEASED	51	Fluke-Pos	III	Perihilar
chol_icgc_2017	CCA_TH_38	1	R273H (driver)	no alteration	no alteration	no alteration	no alteration	no alteration	no alteration	S2024Ffs*40	no alteration	G3038R	no alteration	no alteration	no alteration	no alteration	no alteration	no alteration	no alteration	no alteration	5.2	DECEASED	53	Fluke-Pos	IVA	Intrahepatic
chol_icgc_2017	CCA_TH_39	0	no alteration	no alteration	no alteration	no alteration	no alteration	no alteration	no alteration	no alteration	no alteration	no alteration	no alteration	no alteration	no alteration	no alteration	no alteration	no alteration	no alteration	no alteration	59.6667	LIVING	57	Fluke-Pos	0	Intrahepatic
chol_icgc_2017	CCA_TH_4	0	no alteration	no alteration	no alteration	no alteration	no alteration	no alteration	no alteration	no alteration	no alteration	no alteration	no alteration	no alteration	no alteration	no alteration	no alteration	no alteration	no alteration	no alteration	1	DECEASED	53	Fluke-Pos	IVB	Perihilar
chol_icgc_2017	CCA_TH_40	0	N/A	N/A	N/A	N/A	N/A	N/A	N/A	N/A	N/A	N/A	N/A	N/A	N/A	N/A	N/A	N/A	N/A	N/A	8.4	DECEASED	61	Fluke-Pos	IVA	Intrahepatic
chol_icgc_2017	CCA_TH_41	0	no alteration	no alteration	no alteration	no alteration	no alteration	no alteration	no alteration	no alteration	no alteration	no alteration	no alteration	no alteration	no alteration	no alteration	no alteration	no alteration	no alteration	no alteration	12.3	DECEASED	61	Fluke-Pos	IVB	Intrahepatic
chol_icgc_2017	CCA_TH_42	1	R175H (driver)	no alteration	G12C (driver)	no alteration	no alteration	no alteration	no alteration	no alteration	no alteration	no alteration	no alteration	no alteration	no alteration	no alteration	no alteration	no alteration	no alteration	no alteration	58.6	LIVING	58	Fluke-Pos	I	Intrahepatic
chol_icgc_2017	CCA_TH_43	1	V225I (driver)	no alteration	no alteration	no alteration	no alteration	no alteration	no alteration	no alteration	no alteration	no alteration	no alteration	no alteration	no alteration	no alteration	no alteration	no alteration	no alteration	no alteration	18.6333	DECEASED	38	Fluke-Pos	IVA	Intrahepatic
chol_icgc_2017	CCA_TH_44	1	no alteration	D749Ifs*84 (driver)	no alteration	no alteration	no alteration	no alteration	no alteration	no alteration	no alteration	no alteration	no alteration	no alteration	no alteration	no alteration	no alteration	no alteration	no alteration	no alteration	8.53333	DECEASED	64	Fluke-Pos	IVB	Perihilar
chol_icgc_2017	CCA_TH_45	1	R306* (driver)	no alteration	no alteration	no alteration	no alteration	no alteration	no alteration	no alteration	no alteration	no alteration	no alteration	no alteration	no alteration	no alteration	S170N (driver)	no alteration	no alteration	no alteration	7.9	DECEASED	55	Fluke-Pos	IIIA	Perihilar
chol_icgc_2017	CCA_TH_46	1	K132R (driver)	no alteration	no alteration	no alteration	no alteration	no alteration	no alteration	no alteration	no alteration	no alteration	no alteration	no alteration	no alteration	no alteration	no alteration	no alteration	no alteration	no alteration	24.3667	DECEASED	68	Fluke-Pos	IVA	Intrahepatic
chol_icgc_2017	CCA_TH_47	0	no alteration	no alteration	no alteration	no alteration	no alteration	no alteration	no alteration	no alteration	no alteration	no alteration	no alteration	no alteration	no alteration	no alteration	no alteration	no alteration	no alteration	no alteration	57.1333	LIVING	66	Fluke-Pos	0	Intrahepatic
chol_icgc_2017	CCA_TH_48	1	G244C (driver)	no alteration	no alteration	no alteration	no alteration	no alteration	no alteration	no alteration	no alteration	no alteration	no alteration	no alteration	no alteration	no alteration	no alteration	no alteration	no alteration	no alteration	43.9	DECEASED	67	Fluke-Pos	IVA	Intrahepatic
chol_icgc_2017	CCA_TH_49	1	Y205C (driver)	no alteration	no alteration	no alteration	no alteration	no alteration	no alteration	no alteration	no alteration	no alteration	no alteration	no alteration	no alteration	no alteration	no alteration	no alteration	no alteration	no alteration	4.23333	DECEASED	50	Fluke-Pos	IVB	Intrahepatic
chol_icgc_2017	CCA_TH_5	1	R175H (driver)	Q1474* (driver)	no alteration	no alteration	no alteration	no alteration	no alteration	no alteration	no alteration	no alteration	no alteration	no alteration	no alteration	no alteration	no alteration	no alteration	no alteration	no alteration	12	DECEASED	60	Fluke-Pos	IVA	Intrahepatic
chol_icgc_2017	CCA_TH_50	1	no alteration	G2087* (driver)	no alteration	no alteration	C134R	R88Q (driver)	R903* (driver), R789* (driver), R709Q	R2014I, S2373L, D560N, A225V	no alteration	D210N, R2084W, I1270M, L2354V	no alteration	K682N, R106C, F689L	K161N	R639* (driver), N595S	F341V (driver), D162A (driver), K144E	E1114*	no alteration	R453*, R1157W	56.0333	LIVING	60	Fluke-Pos	IIIA	Intrahepatic
chol_icgc_2017	CCA_TH_51	1	no alteration	no alteration	A146T (driver)	no alteration	no alteration	no alteration	no alteration	no alteration	no alteration	no alteration	no alteration	no alteration	no alteration	no alteration	no alteration	no alteration	no alteration	no alteration	19.1	DECEASED	53	Fluke-Pos	IIIA	Perihilar
chol_icgc_2017	CCA_TH_52	0	no alteration	no alteration	no alteration	no alteration	no alteration	no alteration	no alteration	no alteration	no alteration	no alteration	no alteration	no alteration	no alteration	no alteration	no alteration	no alteration	no alteration	no alteration	14.9	DECEASED	57	Fluke-Pos	II	Perihilar
chol_icgc_2017	CCA_TH_53	1	P278S (driver)	no alteration	no alteration	no alteration	no alteration	no alteration	P442Tfs*11 (driver)	no alteration	no alteration	no alteration	no alteration	no alteration	no alteration	no alteration	no alteration	no alteration	no alteration	no alteration	7.9	DECEASED	53	Fluke-Pos	III	Perihilar
chol_icgc_2017	CCA_TH_54	0	no alteration	no alteration	no alteration	no alteration	no alteration	no alteration	no alteration	no alteration	no alteration	no alteration	no alteration	no alteration	no alteration	no alteration	no alteration	no alteration	no alteration	no alteration	52.7	LIVING	58	Fluke-Pos	0	Perihilar
chol_icgc_2017	CCA_TH_55	1	no alteration	no alteration	G12A (driver)	no alteration	no alteration	no alteration	no alteration	no alteration	no alteration	no alteration	no alteration	no alteration	no alteration	no alteration	no alteration	no alteration	no alteration	no alteration	2.73333	DECEASED	73	Fluke-Pos	III	Perihilar
chol_icgc_2017	CCA_TH_56	1	P72R	no alteration	no alteration	no alteration	no alteration	no alteration	no alteration	no alteration	no alteration	no alteration	no alteration	no alteration	no alteration	no alteration	no alteration	no alteration	no alteration	no alteration	26.1667	DECEASED	56	Fluke-Pos	II	Intrahepatic
chol_icgc_2017	CCA_TH_57	0	no alteration	no alteration	no alteration	no alteration	no alteration	no alteration	no alteration	no alteration	no alteration	no alteration	no alteration	no alteration	no alteration	no alteration	no alteration	no alteration	no alteration	no alteration	3.7	DECEASED	63	Fluke-Pos	IVB	Perihilar
chol_icgc_2017	CCA_TH_58	1	R273C (driver)	no alteration	no alteration	no alteration	no alteration	no alteration	A45T	no alteration	no alteration	no alteration	no alteration	no alteration	no alteration	no alteration	no alteration	no alteration	no alteration	no alteration	45.5333	LIVING	63	Fluke-Pos	IIIA	Perihilar
chol_icgc_2017	CCA_TH_59	1	M246_P250del (driver)	no alteration	no alteration	no alteration	no alteration	no alteration	no alteration	no alteration	no alteration	no alteration	no alteration	no alteration	no alteration	no alteration	no alteration	S1090F	no alteration	no alteration	12.8	DECEASED	47	Fluke-Pos	III	Intrahepatic
chol_icgc_2017	CCA_TH_6	1	no alteration	no alteration	no alteration	no alteration	no alteration	no alteration	no alteration	no alteration	no alteration	no alteration	no alteration	no alteration	V233del	no alteration	no alteration	no alteration	no alteration	no alteration	5.13333	DECEASED	51	Fluke-Pos	IVA	Intrahepatic
chol_icgc_2017	CCA_TH_60	1	R273C (driver)	P146Qfs*86 (driver)	no alteration	no alteration	no alteration	no alteration	no alteration	no alteration	no alteration	no alteration	no alteration	no alteration	no alteration	no alteration	no alteration	no alteration	no alteration	no alteration	43.4333	LIVING	50	Fluke-Pos	II	Perihilar
chol_icgc_2017	CCA_TH_61	0	N/A	N/A	N/A	N/A	N/A	N/A	N/A	N/A	N/A	N/A	N/A	N/A	N/A	N/A	N/A	N/A	N/A	N/A	42.6667	LIVING	60	Fluke-Pos	0	Intrahepatic
chol_icgc_2017	CCA_TH_62	1	I255_L257dup (driver)	no alteration	no alteration	no alteration	no alteration	no alteration	no alteration	no alteration	no alteration	no alteration	no alteration	no alteration	no alteration	no alteration	no alteration	no alteration	no alteration	no alteration	25.0667	DECEASED	64	Fluke-Pos	IIIB	Intrahepatic
chol_icgc_2017	CCA_TH_63	0	no alteration	no alteration	no alteration	no alteration	no alteration	no alteration	no alteration	no alteration	no alteration	no alteration	no alteration	no alteration	no alteration	no alteration	no alteration	no alteration	no alteration	no alteration	5.56667	DECEASED	44	Fluke-Pos	IVA	Intrahepatic
chol_icgc_2017	CCA_TH_64	1	R175H (driver)	no alteration	no alteration	no alteration	no alteration	no alteration	no alteration	no alteration	no alteration	no alteration	no alteration	no alteration	no alteration	no alteration	no alteration	no alteration	no alteration	no alteration	13.1	DECEASED	60	Fluke-Pos	IVB	Perihilar
chol_icgc_2017	CCA_TH_65	1	no alteration	D647V, D647Y	G12V (driver)	R88*	no alteration	no alteration	no alteration	no alteration	no alteration	no alteration	no alteration	no alteration	no alteration	no alteration	no alteration	no alteration	no alteration	no alteration	9.26667	DECEASED	42	Fluke-Pos	IVA	Intrahepatic
chol_icgc_2017	CCA_TH_66	0	no alteration	no alteration	no alteration	no alteration	no alteration	no alteration	no alteration	no alteration	no alteration	no alteration	no alteration	no alteration	no alteration	no alteration	no alteration	no alteration	no alteration	no alteration	24.2667	DECEASED	62	Fluke-Pos	III	Perihilar
chol_icgc_2017	CCA_TH_67	0	no alteration	no alteration	no alteration	no alteration	no alteration	no alteration	no alteration	no alteration	no alteration	no alteration	no alteration	no alteration	no alteration	no alteration	no alteration	no alteration	no alteration	no alteration	2.03333	DECEASED	52	Fluke-Pos	IVB	Perihilar
chol_icgc_2017	CCA_TH_68	1	R273H (driver)	no alteration	no alteration	no alteration	no alteration	no alteration	no alteration	no alteration	no alteration	no alteration	no alteration	no alteration	no alteration	no alteration	no alteration	no alteration	no alteration	no alteration	11.7	DECEASED	56	Fluke-Pos	IVB	Perihilar
chol_icgc_2017	CCA_TH_69	0	no alteration	no alteration	no alteration	no alteration	no alteration	no alteration	no alteration	no alteration	no alteration	no alteration	no alteration	no alteration	no alteration	no alteration	no alteration	no alteration	no alteration	no alteration	37.0333	LIVING	48	Fluke-Pos	II	Intrahepatic
chol_icgc_2017	CCA_TH_7	1	Y236C (driver)	no alteration	no alteration	no alteration	no alteration	no alteration	no alteration	no alteration	no alteration	no alteration	no alteration	no alteration	no alteration	no alteration	C211* (driver)	no alteration	no alteration	no alteration	15.2	DECEASED	61	Fluke-Pos	IIIB	Perihilar
chol_icgc_2017	CCA_TH_70	0	no alteration	no alteration	no alteration	no alteration	no alteration	no alteration	no alteration	no alteration	no alteration	no alteration	no alteration	no alteration	no alteration	no alteration	no alteration	no alteration	no alteration	no alteration	3.83333	DECEASED	49	Fluke-Pos	IVA	Intrahepatic
chol_icgc_2017	CCA_TH_71	1	H178Q (driver)	no alteration	no alteration	no alteration	no alteration	no alteration	no alteration	no alteration	no alteration	no alteration	K601E (driver)	no alteration	no alteration	no alteration	no alteration	no alteration	no alteration	no alteration	7.3	DECEASED	59	Fluke-Pos	IVA	Intrahepatic
chol_icgc_2017	CCA_TH_72	1	S127F (driver)	Y534* (driver)	no alteration	no alteration	no alteration	no alteration	no alteration	no alteration	no alteration	no alteration	no alteration	no alteration	no alteration	no alteration	no alteration	no alteration	no alteration	no alteration	36.3667	LIVING	66	Fluke-Pos	II	Intrahepatic
chol_icgc_2017	CCA_TH_73	0	no alteration	no alteration	no alteration	no alteration	no alteration	no alteration	no alteration	no alteration	no alteration	no alteration	no alteration	no alteration	no alteration	no alteration	no alteration	no alteration	no alteration	no alteration	3.33333	DECEASED	75	Fluke-Pos	IIIB	Perihilar
chol_icgc_2017	CCA_TH_74	1	no alteration	Q588* (driver)	no alteration	A785T, M73Ifs*20	no alteration	no alteration	no alteration	no alteration	S653C (driver)	no alteration	no alteration	no alteration	no alteration	no alteration	no alteration	no alteration	no alteration	no alteration	2.63333	DECEASED	43	Fluke-Pos	IVB	Intrahepatic
chol_icgc_2017	CCA_TH_75	1	R273C (driver)	no alteration	no alteration	no alteration	no alteration	no alteration	no alteration	no alteration	no alteration	no alteration	no alteration	no alteration	no alteration	no alteration	no alteration	no alteration	no alteration	no alteration	34.5667	LIVING	52	Fluke-Pos	III	Perihilar
chol_icgc_2017	CCA_TH_76	1	S241F (driver), S96Pfs*55 (driver)	E1726* (driver)	no alteration	no alteration	no alteration	no alteration	no alteration	no alteration	no alteration	no alteration	no alteration	no alteration	no alteration	no alteration	no alteration	no alteration	no alteration	no alteration	18.0667	DECEASED	73	Fluke-Pos	II	Perihilar
chol_icgc_2017	CCA_TH_77	1	X126_splice (driver)	no alteration	G12C (driver)	no alteration	no alteration	no alteration	no alteration	no alteration	no alteration	no alteration	no alteration	no alteration	no alteration	no alteration	no alteration	no alteration	no alteration	no alteration	7.06667	DECEASED	59	Fluke-Pos	IVA	Intrahepatic
chol_icgc_2017	CCA_TH_78	1	X125_splice (driver)	M274Ifs*126 (driver)	no alteration	no alteration	no alteration	no alteration	no alteration	no alteration	no alteration	no alteration	no alteration	no alteration	no alteration	no alteration	no alteration	no alteration	no alteration	no alteration	16.2667	DECEASED	60	Fluke-Pos	IVA	Intrahepatic
chol_icgc_2017	CCA_TH_79	1	P177_C182del (driver)	E626* (driver)	no alteration	no alteration	no alteration	K111E (driver)	no alteration	no alteration	no alteration	no alteration	no alteration	no alteration	no alteration	no alteration	no alteration	no alteration	no alteration	no alteration	16.8333	DECEASED	64	Fluke-Pos	IVA	Intrahepatic
chol_icgc_2017	CCA_TH_8	1	C135R (driver)	no alteration	no alteration	no alteration	no alteration	no alteration	no alteration	no alteration	no alteration	no alteration	no alteration	no alteration	no alteration	no alteration	no alteration	no alteration	no alteration	no alteration	8.86667	DECEASED	53	Fluke-Pos	III	Perihilar
chol_icgc_2017	CCA_TH_80	0	no alteration	no alteration	no alteration	no alteration	no alteration	no alteration	no alteration	no alteration	no alteration	no alteration	no alteration	no alteration	no alteration	no alteration	no alteration	no alteration	no alteration	no alteration	6.2	DECEASED	56	Fluke-Pos	IIIB	Intrahepatic
chol_icgc_2017	CCA_TH_81	1	C238Y (driver)	Q1424* (driver)	no alteration	no alteration	no alteration	no alteration	no alteration	no alteration	no alteration	no alteration	no alteration	no alteration	no alteration	no alteration	no alteration	P1287S	no alteration	no alteration	19.2333	DECEASED	49	Fluke-Pos	IVB	Perihilar
chol_icgc_2017	CCA_TH_82	1	R158H (driver)	Q1424* (driver)	Q22K (driver)	no alteration	Q123* (driver)	no alteration	no alteration	no alteration	no alteration	no alteration	no alteration	no alteration	no alteration	no alteration	no alteration	no alteration	no alteration	no alteration	10.0667	DECEASED	71	Fluke-Pos	II	Perihilar
chol_icgc_2017	CCA_TH_83	1	Y234C (driver)	Q467Rfs*152 (driver)	no alteration	K638Rfs*11	no alteration	no alteration	no alteration	no alteration	R678Q (driver)	no alteration	no alteration	no alteration	no alteration	no alteration	no alteration	no alteration	no alteration	no alteration	12.6333	DECEASED	61	Fluke-Pos	IIIA	Intrahepatic
chol_icgc_2017	CCA_TH_84	1	Q192* (driver)	no alteration	no alteration	no alteration	no alteration	no alteration	no alteration	no alteration	no alteration	no alteration	no alteration	no alteration	no alteration	no alteration	no alteration	no alteration	no alteration	no alteration	17.4333	DECEASED	50	Fluke-Pos	I	Intrahepatic
chol_icgc_2017	CCA_TH_85	1	V272M (driver)	G191Afs*41 (driver)	no alteration	no alteration	no alteration	no alteration	no alteration	no alteration	no alteration	no alteration	no alteration	no alteration	no alteration	no alteration	no alteration	no alteration	no alteration	no alteration	30.5333	LIVING	52	Fluke-Pos	II	Perihilar
chol_icgc_2017	CCA_TH_86	1	R273H (driver)	no alteration	Q61L (driver)	no alteration	no alteration	no alteration	no alteration	no alteration	G776V (driver)	no alteration	no alteration	no alteration	no alteration	no alteration	no alteration	no alteration	no alteration	no alteration	30.1333	LIVING	70	Fluke-Pos	II	Perihilar
chol_icgc_2017	CCA_TH_87	1	G245S (driver)	no alteration	no alteration	no alteration	no alteration	no alteration	no alteration	no alteration	no alteration	no alteration	no alteration	no alteration	no alteration	no alteration	no alteration	no alteration	no alteration	no alteration	30.1	LIVING	67	Fluke-Pos	I	Intrahepatic
chol_icgc_2017	CCA_TH_88	1	P71Sfs*78 (driver)	no alteration	no alteration	no alteration	no alteration	no alteration	no alteration	no alteration	no alteration	no alteration	no alteration	no alteration	no alteration	no alteration	no alteration	no alteration	no alteration	no alteration	15.2333	DECEASED	64	Fluke-Pos	III	Intrahepatic
chol_icgc_2017	CCA_TH_89	1	R273C (driver)	no alteration	no alteration	no alteration	no alteration	no alteration	no alteration	no alteration	T862A (driver)	R1180C	no alteration	no alteration	no alteration	no alteration	no alteration	no alteration	no alteration	no alteration	3.63333	DECEASED	66	Fluke-Pos	IVA	Intrahepatic
chol_icgc_2017	CCA_TH_9	1	T230Yfs*10 (driver)	no alteration	no alteration	no alteration	no alteration	no alteration	no alteration	no alteration	no alteration	no alteration	no alteration	no alteration	no alteration	no alteration	no alteration	no alteration	no alteration	no alteration	12.4333	LIVING	48	Fluke-Pos	III	Intrahepatic
chol_icgc_2017	CCA_TH_90	1	R273H (driver)	no alteration	no alteration	no alteration	no alteration	no alteration	no alteration	no alteration	no alteration	no alteration	no alteration	no alteration	no alteration	no alteration	no alteration	no alteration	no alteration	no alteration	28.7667	LIVING	56	Fluke-Pos	II	Intrahepatic
chol_icgc_2017	CCA_TH_91	1	X33_splice (driver)	no alteration	G13D (driver)	no alteration	no alteration	no alteration	no alteration	no alteration	no alteration	no alteration	no alteration	no alteration	no alteration	no alteration	no alteration	no alteration	no alteration	no alteration	28.4	LIVING	55	Fluke-Pos	II	Intrahepatic
chol_icgc_2017	CCA_TH_92	1	A86Vfs*55 (driver)	no alteration	no alteration	no alteration	A93Vfs*70 (driver), R426Lfs*176 (driver)	no alteration	no alteration	no alteration	no alteration	no alteration	no alteration	no alteration	no alteration	no alteration	no alteration	no alteration	no alteration	no alteration	12.7	DECEASED	62	Fluke-Pos	III	Intrahepatic
chol_icgc_2017	CCA_TH_93	1	no alteration	Q2026* (driver)	G12D (driver)	no alteration	no alteration	no alteration	no alteration	no alteration	no alteration	no alteration	no alteration	R992H	no alteration	no alteration	no alteration	no alteration	no alteration	no alteration	3.5	DECEASED	64	Fluke-Pos	IVA	Intrahepatic
chol_icgc_2017	CCA_TH_94	1	S241F (driver)	no alteration	no alteration	no alteration	no alteration	no alteration	no alteration	no alteration	no alteration	no alteration	no alteration	no alteration	no alteration	no alteration	no alteration	no alteration	no alteration	no alteration	26.8	LIVING	52	Fluke-Pos	IIIB	Perihilar
chol_icgc_2017	CCA_TH_95	1	N263_F270delinsI (driver)	no alteration	no alteration	no alteration	no alteration	no alteration	no alteration	no alteration	no alteration	no alteration	no alteration	no alteration	no alteration	no alteration	no alteration	no alteration	no alteration	T897M	9.96667	DECEASED	65	Fluke-Pos	IVA	Perihilar
chol_icgc_2017	CCA_TH_96	1	R175H (driver)	S1791* (driver)	no alteration	no alteration	no alteration	no alteration	no alteration	no alteration	no alteration	no alteration	no alteration	no alteration	no alteration	no alteration	no alteration	no alteration	no alteration	no alteration	8.8	DECEASED	44	Fluke-Pos	IVA	Intrahepatic
chol_icgc_2017	CCA_TH_97	1	C135Y (driver)	G922Afs*2 (driver)	no alteration	no alteration	no alteration	no alteration	no alteration	no alteration	no alteration	no alteration	no alteration	no alteration	no alteration	no alteration	no alteration	no alteration	no alteration	no alteration	25.2	LIVING	65	Fluke-Pos	IIIA	Perihilar
chol_icgc_2017	CCA_TH_98	1	V274G (driver)	no alteration	no alteration	no alteration	P221L (driver)	no alteration	no alteration	no alteration	no alteration	no alteration	no alteration	no alteration	no alteration	no alteration	N184Efs*6 (driver)	no alteration	no alteration	no alteration	2.6	DECEASED	45	Fluke-Pos	IVA	Perihilar
chol_icgc_2017	CCA_TH_99	1	V172_R174delinsG (driver)	no alteration	no alteration	no alteration	no alteration	no alteration	no alteration	Q21*	no alteration	no alteration	no alteration	no alteration	no alteration	no alteration	no alteration	no alteration	no alteration	no alteration	10.5	DECEASED	63	Fluke-Pos	II	Intrahepatic
chol_icgc_2017	CCA_TW_1	0	N/A	N/A	N/A	N/A	N/A	N/A	N/A	N/A	N/A	N/A	N/A	N/A	N/A	N/A	N/A	N/A	N/A	N/A	54	N/A	53	Fluke-Neg	I	Intrahepatic
chol_icgc_2017	CCA_TW_10	0	N/A	N/A	N/A	N/A	N/A	N/A	N/A	N/A	N/A	N/A	N/A	N/A	N/A	N/A	N/A	N/A	N/A	N/A	33	N/A	66	Fluke-Neg	N/A	Intrahepatic
chol_icgc_2017	CCA_TW_2	0	N/A	N/A	N/A	N/A	N/A	N/A	N/A	N/A	N/A	N/A	N/A	N/A	N/A	N/A	N/A	N/A	N/A	N/A	51.8667	N/A	50	Fluke-Neg	I	Intrahepatic
chol_icgc_2017	CCA_TW_3	0	N/A	N/A	N/A	N/A	N/A	N/A	N/A	N/A	N/A	N/A	N/A	N/A	N/A	N/A	N/A	N/A	N/A	N/A	9.46667	N/A	55	Fluke-Neg	IVA	Intrahepatic
chol_icgc_2017	CCA_TW_4	0	N/A	N/A	N/A	N/A	N/A	N/A	N/A	N/A	N/A	N/A	N/A	N/A	N/A	N/A	N/A	N/A	N/A	N/A	81	N/A	48	Fluke-Neg	III	Intrahepatic
chol_icgc_2017	CCA_TW_5	0	N/A	N/A	N/A	N/A	N/A	N/A	N/A	N/A	N/A	N/A	N/A	N/A	N/A	N/A	N/A	N/A	N/A	N/A	22.5	N/A	48	Fluke-Neg	II	N/A
chol_icgc_2017	CCA_TW_6	0	N/A	N/A	N/A	N/A	N/A	N/A	N/A	N/A	N/A	N/A	N/A	N/A	N/A	N/A	N/A	N/A	N/A	N/A	38	N/A	35	Fluke-Neg	I	Intrahepatic
chol_icgc_2017	CCA_TW_7	0	N/A	N/A	N/A	N/A	N/A	N/A	N/A	N/A	N/A	N/A	N/A	N/A	N/A	N/A	N/A	N/A	N/A	N/A	35.4667	N/A	68	Fluke-Neg	I	N/A
chol_icgc_2017	CCA_TW_8	0	N/A	N/A	N/A	N/A	N/A	N/A	N/A	N/A	N/A	N/A	N/A	N/A	N/A	N/A	N/A	N/A	N/A	N/A	11.4	N/A	74	Fluke-Neg	IIA	N/A
chol_icgc_2017	CCA_TW_9	0	N/A	N/A	N/A	N/A	N/A	N/A	N/A	N/A	N/A	N/A	N/A	N/A	N/A	N/A	N/A	N/A	N/A	N/A	21.0333	N/A	77	Fluke-Neg	N/A	N/A
chol_jhu_2013	CHOL01	1	no alteration	no alteration	no alteration	no alteration	no alteration	no alteration	no alteration	no alteration	no alteration	no alteration	no alteration	no alteration	no alteration	no alteration	no alteration	no alteration	G13R (driver)	no alteration	N/A	N/A	N/A	N/A	N/A	Intrahepatic
chol_jhu_2013	CHOL02	0	no alteration	no alteration	no alteration	no alteration	no alteration	no alteration	no alteration	no alteration	no alteration	no alteration	no alteration	no alteration	no alteration	no alteration	no alteration	no alteration	no alteration	no alteration	N/A	N/A	N/A	N/A	N/A	Intrahepatic
chol_jhu_2013	CHOL04	0	no alteration	no alteration	no alteration	no alteration	no alteration	no alteration	no alteration	no alteration	no alteration	no alteration	no alteration	no alteration	no alteration	no alteration	no alteration	no alteration	no alteration	no alteration	N/A	N/A	N/A	N/A	N/A	Intrahepatic
chol_jhu_2013	CHOL06	0	no alteration	no alteration	no alteration	no alteration	no alteration	no alteration	no alteration	no alteration	no alteration	no alteration	no alteration	no alteration	no alteration	no alteration	no alteration	no alteration	no alteration	no alteration	N/A	N/A	N/A	N/A	N/A	Intrahepatic
chol_jhu_2013	CHOL07	1	no alteration	no alteration	no alteration	no alteration	no alteration	no alteration	no alteration	no alteration	no alteration	no alteration	no alteration	no alteration	F276C (driver)	no alteration	no alteration	no alteration	no alteration	no alteration	N/A	N/A	N/A	N/A	N/A	Intrahepatic
chol_jhu_2013	CHOL08	1	L206* (driver)	Q589* (driver)	no alteration	no alteration	no alteration	no alteration	no alteration	no alteration	no alteration	no alteration	no alteration	no alteration	no alteration	no alteration	no alteration	no alteration	no alteration	no alteration	N/A	N/A	N/A	N/A	N/A	Intrahepatic
chol_jhu_2013	CHOL09	1	no alteration	no alteration	no alteration	no alteration	no alteration	no alteration	no alteration	no alteration	no alteration	no alteration	no alteration	no alteration	Y375C (driver)	no alteration	no alteration	no alteration	no alteration	no alteration	N/A	N/A	N/A	N/A	N/A	Intrahepatic
chol_jhu_2013	CHOL11	0	no alteration	no alteration	no alteration	no alteration	no alteration	no alteration	no alteration	no alteration	no alteration	no alteration	no alteration	no alteration	no alteration	no alteration	no alteration	no alteration	no alteration	no alteration	N/A	N/A	N/A	N/A	N/A	Intrahepatic
chol_jhu_2013	CHOL12	1	E285V (driver)	no alteration	no alteration	no alteration	K44Sfs*7 (driver)	no alteration	no alteration	no alteration	no alteration	no alteration	no alteration	no alteration	no alteration	no alteration	no alteration	no alteration	no alteration	Q63K	N/A	N/A	N/A	N/A	N/A	Intrahepatic
chol_jhu_2013	CHOL13	1	no alteration	no alteration	G12D (driver)	no alteration	I303S	no alteration	no alteration	no alteration	no alteration	no alteration	no alteration	no alteration	no alteration	no alteration	no alteration	no alteration	no alteration	no alteration	N/A	N/A	N/A	N/A	N/A	Intrahepatic
chol_jhu_2013	CHOL14	1	no alteration	Q543K	no alteration	no alteration	no alteration	no alteration	no alteration	no alteration	no alteration	no alteration	no alteration	no alteration	no alteration	no alteration	N329Ifs*15 (driver)	no alteration	no alteration	no alteration	N/A	N/A	N/A	N/A	N/A	Intrahepatic
chol_jhu_2013	CHOL15	1	no alteration	R1722* (driver)	no alteration	no alteration	no alteration	no alteration	no alteration	no alteration	no alteration	no alteration	no alteration	no alteration	no alteration	no alteration	no alteration	no alteration	no alteration	no alteration	N/A	N/A	N/A	N/A	N/A	Intrahepatic
chol_jhu_2013	CHOL18	1	no alteration	H1608R	no alteration	no alteration	no alteration	no alteration	no alteration	no alteration	no alteration	T368I	no alteration	no alteration	no alteration	no alteration	no alteration	no alteration	no alteration	no alteration	N/A	N/A	N/A	N/A	N/A	Intrahepatic
chol_jhu_2013	CHOL19	1	no alteration	no alteration	no alteration	no alteration	no alteration	no alteration	no alteration	no alteration	no alteration	no alteration	no alteration	no alteration	no alteration	no alteration	R130* (driver)	no alteration	no alteration	no alteration	N/A	N/A	N/A	N/A	N/A	Intrahepatic
chol_jhu_2013	CHOL20	1	no alteration	no alteration	no alteration	no alteration	no alteration	no alteration	no alteration	S1042T	no alteration	no alteration	no alteration	no alteration	no alteration	no alteration	no alteration	no alteration	no alteration	no alteration	N/A	N/A	N/A	N/A	N/A	Intrahepatic
chol_jhu_2013	CHOL24	1	no alteration	Y815* (driver)	no alteration	S330Pfs*63	no alteration	H1047L (driver)	no alteration	no alteration	no alteration	no alteration	no alteration	no alteration	no alteration	no alteration	no alteration	no alteration	no alteration	no alteration	N/A	N/A	N/A	N/A	N/A	Intrahepatic
chol_jhu_2013	CHOL25	0	no alteration	no alteration	no alteration	no alteration	no alteration	no alteration	no alteration	no alteration	no alteration	no alteration	no alteration	no alteration	no alteration	no alteration	no alteration	no alteration	no alteration	no alteration	N/A	N/A	N/A	N/A	N/A	Intrahepatic
chol_jhu_2013	CHOL26	0	no alteration	no alteration	no alteration	no alteration	no alteration	no alteration	no alteration	no alteration	no alteration	no alteration	no alteration	no alteration	no alteration	no alteration	no alteration	no alteration	no alteration	no alteration	N/A	N/A	N/A	N/A	N/A	Intrahepatic
chol_jhu_2013	CHOL27	0	no alteration	no alteration	no alteration	no alteration	no alteration	no alteration	no alteration	no alteration	no alteration	no alteration	no alteration	no alteration	no alteration	no alteration	no alteration	no alteration	no alteration	no alteration	N/A	N/A	N/A	N/A	N/A	Intrahepatic
chol_jhu_2013	CHOL28	1	no alteration	no alteration	no alteration	no alteration	no alteration	no alteration	no alteration	no alteration	no alteration	no alteration	no alteration	no alteration	H624del	no alteration	no alteration	no alteration	no alteration	no alteration	N/A	N/A	N/A	N/A	N/A	Intrahepatic
chol_jhu_2013	CHOL35	0	no alteration	no alteration	no alteration	no alteration	no alteration	no alteration	no alteration	no alteration	no alteration	no alteration	no alteration	no alteration	no alteration	no alteration	no alteration	no alteration	no alteration	no alteration	N/A	N/A	N/A	N/A	N/A	Intrahepatic
chol_jhu_2013	CHOL37	1	no alteration	N218Qfs*180 (driver)	no alteration	no alteration	no alteration	no alteration	no alteration	no alteration	no alteration	no alteration	no alteration	no alteration	no alteration	no alteration	no alteration	no alteration	no alteration	no alteration	N/A	N/A	N/A	N/A	N/A	Intrahepatic
chol_jhu_2013	CHOL40	0	no alteration	no alteration	no alteration	no alteration	no alteration	no alteration	no alteration	no alteration	no alteration	no alteration	no alteration	no alteration	no alteration	no alteration	no alteration	no alteration	no alteration	no alteration	N/A	N/A	N/A	N/A	N/A	Intrahepatic
chol_jhu_2013	CHOL42	1	no alteration	no alteration	no alteration	R415Afs*8	no alteration	K111E (driver)	no alteration	no alteration	no alteration	no alteration	no alteration	no alteration	C382R (driver)	no alteration	no alteration	no alteration	no alteration	no alteration	N/A	N/A	N/A	N/A	N/A	Intrahepatic
chol_jhu_2013	CHOL44	0	no alteration	no alteration	no alteration	no alteration	no alteration	no alteration	no alteration	no alteration	no alteration	no alteration	no alteration	no alteration	no alteration	no alteration	no alteration	no alteration	no alteration	no alteration	N/A	N/A	N/A	N/A	N/A	Intrahepatic
chol_jhu_2013	CHOL47	0	no alteration	no alteration	no alteration	no alteration	no alteration	no alteration	no alteration	no alteration	no alteration	no alteration	no alteration	no alteration	no alteration	no alteration	no alteration	no alteration	no alteration	no alteration	N/A	N/A	N/A	N/A	N/A	Intrahepatic
chol_jhu_2013	CHOL48	0	no alteration	no alteration	no alteration	no alteration	no alteration	no alteration	no alteration	no alteration	no alteration	no alteration	no alteration	no alteration	no alteration	no alteration	no alteration	no alteration	no alteration	no alteration	N/A	N/A	N/A	N/A	N/A	Intrahepatic
chol_jhu_2013	CHOL49	0	no alteration	no alteration	no alteration	no alteration	no alteration	no alteration	no alteration	no alteration	no alteration	no alteration	no alteration	no alteration	no alteration	no alteration	no alteration	no alteration	no alteration	no alteration	N/A	N/A	N/A	N/A	N/A	Intrahepatic
chol_jhu_2013	CHOL50	0	no alteration	no alteration	no alteration	no alteration	no alteration	no alteration	no alteration	no alteration	no alteration	no alteration	no alteration	no alteration	no alteration	no alteration	no alteration	no alteration	no alteration	no alteration	N/A	N/A	N/A	N/A	N/A	Intrahepatic
chol_jhu_2013	CHOL52	0	no alteration	no alteration	no alteration	no alteration	no alteration	no alteration	no alteration	no alteration	no alteration	no alteration	no alteration	no alteration	no alteration	no alteration	no alteration	no alteration	no alteration	no alteration	N/A	N/A	N/A	N/A	N/A	Intrahepatic
chol_jhu_2013	CHOL53	0	no alteration	no alteration	no alteration	no alteration	no alteration	no alteration	no alteration	no alteration	no alteration	no alteration	no alteration	no alteration	no alteration	no alteration	no alteration	no alteration	no alteration	no alteration	N/A	N/A	N/A	N/A	N/A	Intrahepatic
chol_jhu_2013	CHOL54	0	no alteration	no alteration	no alteration	no alteration	no alteration	no alteration	no alteration	no alteration	no alteration	no alteration	no alteration	no alteration	no alteration	no alteration	no alteration	no alteration	no alteration	no alteration	N/A	N/A	N/A	N/A	N/A	Intrahepatic
chol_jhu_2013	GB02	1	no alteration	no alteration	no alteration	no alteration	no alteration	C901F (driver)	no alteration	no alteration	no alteration	no alteration	no alteration	no alteration	no alteration	no alteration	no alteration	no alteration	no alteration	no alteration	N/A	N/A	N/A	N/A	N/A	Intrahepatic
chol_jhu_2013	GB07	1	R175H (driver)	no alteration	no alteration	no alteration	no alteration	no alteration	no alteration	no alteration	no alteration	no alteration	no alteration	no alteration	no alteration	no alteration	no alteration	no alteration	no alteration	no alteration	N/A	N/A	N/A	N/A	N/A	Intrahepatic
chol_jhu_2013	GB10	1	S95Ffs*53 (driver)	no alteration	no alteration	no alteration	no alteration	no alteration	no alteration	no alteration	no alteration	no alteration	no alteration	no alteration	no alteration	no alteration	no alteration	no alteration	no alteration	no alteration	N/A	N/A	N/A	N/A	N/A	Intrahepatic
chol_jhu_2013	GB11	1	R175L (driver)	no alteration	no alteration	no alteration	no alteration	no alteration	no alteration	no alteration	no alteration	no alteration	no alteration	no alteration	no alteration	no alteration	no alteration	no alteration	no alteration	no alteration	N/A	N/A	N/A	N/A	N/A	Intrahepatic
chol_jhu_2013	GB16	0	no alteration	no alteration	no alteration	no alteration	no alteration	no alteration	no alteration	no alteration	no alteration	no alteration	no alteration	no alteration	no alteration	no alteration	no alteration	no alteration	no alteration	no alteration	N/A	N/A	N/A	N/A	N/A	Intrahepatic
chol_jhu_2013	GB18	1	C275F (driver)	no alteration	no alteration	no alteration	no alteration	no alteration	X897_splice (driver)	no alteration	no alteration	no alteration	no alteration	no alteration	no alteration	no alteration	no alteration	no alteration	no alteration	no alteration	N/A	N/A	N/A	N/A	N/A	Intrahepatic
chol_jhu_2013	GB19	1	Q331* (driver)	no alteration	no alteration	R103C	no alteration	no alteration	no alteration	no alteration	no alteration	no alteration	no alteration	no alteration	no alteration	no alteration	no alteration	no alteration	no alteration	no alteration	N/A	N/A	N/A	N/A	N/A	Intrahepatic
chol_jhu_2013	GB23	1	R213* (driver)	no alteration	no alteration	no alteration	no alteration	no alteration	no alteration	no alteration	no alteration	no alteration	no alteration	no alteration	no alteration	no alteration	no alteration	no alteration	no alteration	no alteration	N/A	N/A	N/A	N/A	N/A	Intrahepatic
chol_msk_2018	P-0000114-T01-IM3	0	no alteration	no alteration	no alteration	N/A	no alteration	no alteration	no alteration	N/A	no alteration	N/A	no alteration	no alteration	no alteration	no alteration	no alteration	no alteration	no alteration	N/A	15.16	DECEASED	59	N/A	N/A	Intrahepatic
chol_msk_2018	P-0000114-T02-IM3	0	no alteration	no alteration	no alteration	N/A	no alteration	no alteration	no alteration	N/A	no alteration	N/A	no alteration	no alteration	no alteration	no alteration	no alteration	no alteration	no alteration	N/A	N/A	N/A	N/A	N/A	N/A	N/A
chol_msk_2018	P-0000127-T01-IM3	1	Y234C (driver)	no alteration	no alteration	N/A	no alteration	no alteration	no alteration	N/A	no alteration	N/A	no alteration	no alteration	no alteration	no alteration	no alteration	no alteration	no alteration	N/A	14.28	DECEASED	64	N/A	N/A	Intrahepatic
chol_msk_2018	P-0000127-T02-IM3	1	Y234C (driver)	no alteration	no alteration	N/A	no alteration	no alteration	no alteration	N/A	no alteration	N/A	no alteration	no alteration	no alteration	no alteration	no alteration	no alteration	no alteration	N/A	N/A	N/A	N/A	N/A	N/A	N/A
chol_msk_2018	P-0000147-T01-IM3	0	no alteration	no alteration	no alteration	N/A	no alteration	no alteration	no alteration	N/A	no alteration	N/A	no alteration	no alteration	no alteration	no alteration	no alteration	no alteration	no alteration	N/A	38.433	LIVING	45	N/A	N/A	Intrahepatic
chol_msk_2018	P-0000154-T01-IM3	1	no alteration	no alteration	no alteration	N/A	no alteration	no alteration	no alteration	N/A	no alteration	N/A	no alteration	no alteration	no alteration	no alteration	no alteration	no alteration	Q61K (driver)	N/A	23.145	DECEASED	79	N/A	N/A	Intrahepatic
chol_msk_2018	P-0000159-T01-IM3	0	no alteration	no alteration	no alteration	N/A	no alteration	no alteration	no alteration	N/A	no alteration	N/A	no alteration	no alteration	no alteration	no alteration	no alteration	no alteration	no alteration	N/A	18.773	DECEASED	70	N/A	N/A	Intrahepatic
chol_msk_2018	P-0000189-T01-IM3	0	no alteration	no alteration	no alteration	N/A	no alteration	no alteration	no alteration	N/A	no alteration	N/A	no alteration	no alteration	no alteration	no alteration	no alteration	no alteration	no alteration	N/A	44.416	DECEASED	55	N/A	N/A	Intrahepatic
chol_msk_2018	P-0000192-T02-IM3	1	no alteration	no alteration	G12D (driver)	N/A	no alteration	no alteration	no alteration	N/A	no alteration	N/A	no alteration	no alteration	no alteration	no alteration	no alteration	no alteration	no alteration	N/A	111.222	DECEASED	71	N/A	N/A	Intrahepatic
chol_msk_2018	P-0000211-T01-IM3	1	G244S (driver)	no alteration	no alteration	N/A	no alteration	no alteration	no alteration	N/A	no alteration	N/A	no alteration	no alteration	no alteration	no alteration	no alteration	no alteration	no alteration	N/A	32.252	DECEASED	62	N/A	N/A	Intrahepatic
chol_msk_2018	P-0000238-T01-IM3	0	no alteration	no alteration	no alteration	N/A	no alteration	no alteration	no alteration	N/A	no alteration	N/A	no alteration	no alteration	no alteration	no alteration	no alteration	no alteration	no alteration	N/A	134.794	LIVING	83	N/A	N/A	Intrahepatic
chol_msk_2018	P-0000245-T01-IM3	1	S106R (driver)	no alteration	no alteration	N/A	no alteration	no alteration	R711* (driver)	N/A	no alteration	N/A	no alteration	no alteration	no alteration	no alteration	no alteration	no alteration	no alteration	N/A	22.455	DECEASED	68	N/A	N/A	Intrahepatic
chol_msk_2018	P-0000298-T01-IM3	1	no alteration	N1341Ifs*140 (driver)	no alteration	N/A	no alteration	no alteration	no alteration	N/A	no alteration	N/A	no alteration	no alteration	no alteration	no alteration	no alteration	no alteration	no alteration	N/A	52.636	LIVING	61	N/A	N/A	Intrahepatic
chol_msk_2018	P-0000303-T01-IM3	0	no alteration	no alteration	no alteration	N/A	no alteration	no alteration	no alteration	N/A	no alteration	N/A	no alteration	no alteration	no alteration	no alteration	no alteration	no alteration	no alteration	N/A	115.397	DECEASED	61	N/A	N/A	Intrahepatic
chol_msk_2018	P-0000327-T01-IM3	1	no alteration	S1057P	no alteration	N/A	no alteration	no alteration	no alteration	N/A	no alteration	N/A	no alteration	no alteration	no alteration	no alteration	no alteration	no alteration	no alteration	N/A	16.899	DECEASED	72	N/A	N/A	Intrahepatic
chol_msk_2018	P-0000328-T01-IM3	0	no alteration	no alteration	no alteration	N/A	no alteration	no alteration	no alteration	N/A	no alteration	N/A	no alteration	no alteration	no alteration	no alteration	no alteration	no alteration	no alteration	N/A	68.581	LIVING	78	N/A	N/A	Intrahepatic
chol_msk_2018	P-0000360-T01-IM3	0	no alteration	no alteration	no alteration	N/A	no alteration	no alteration	no alteration	N/A	no alteration	N/A	no alteration	no alteration	no alteration	no alteration	no alteration	no alteration	no alteration	N/A	23.441	DECEASED	64	N/A	N/A	Intrahepatic
chol_msk_2018	P-0000362-T01-IM3	1	no alteration	no alteration	no alteration	N/A	no alteration	no alteration	no alteration	N/A	AMP (driver)	N/A	no alteration	no alteration	no alteration	no alteration	no alteration	no alteration	no alteration	N/A	13.216	DECEASED	71	N/A	N/A	Intrahepatic
chol_msk_2018	P-0000402-T01-IM3	0	no alteration	no alteration	no alteration	N/A	no alteration	no alteration	no alteration	N/A	no alteration	N/A	no alteration	no alteration	no alteration	no alteration	no alteration	no alteration	no alteration	N/A	178.783	DECEASED	69	N/A	N/A	Intrahepatic
chol_msk_2018	P-0000419-T01-IM3	0	no alteration	no alteration	no alteration	N/A	no alteration	no alteration	no alteration	N/A	no alteration	N/A	no alteration	no alteration	no alteration	no alteration	no alteration	no alteration	no alteration	N/A	23.671	DECEASED	57	N/A	N/A	Intrahepatic
chol_msk_2018	P-0000599-T01-IM3	1	no alteration	no alteration	no alteration	N/A	no alteration	E542K (driver)	no alteration	N/A	no alteration	N/A	no alteration	no alteration	no alteration	no alteration	no alteration	no alteration	no alteration	N/A	317.49	DECEASED	54	N/A	N/A	Intrahepatic
chol_msk_2018	P-0000637-T01-IM3	1	no alteration	no alteration	no alteration	N/A	no alteration	no alteration	S1013G	N/A	no alteration	N/A	no alteration	no alteration	no alteration	no alteration	no alteration	no alteration	no alteration	N/A	37.611	LIVING	40	N/A	N/A	Intrahepatic
chol_msk_2018	P-0000643-T01-IM3	0	no alteration	no alteration	no alteration	N/A	no alteration	no alteration	no alteration	N/A	no alteration	N/A	no alteration	no alteration	no alteration	no alteration	no alteration	no alteration	no alteration	N/A	48.394	LIVING	70	N/A	N/A	Intrahepatic
chol_msk_2018	P-0000644-T01-IM3	1	no alteration	no alteration	no alteration	N/A	no alteration	no alteration	no alteration	N/A	no alteration	N/A	no alteration	no alteration	AHCYL1-FGFR2 fusion	no alteration	no alteration	no alteration	no alteration	N/A	24.723	DECEASED	71	N/A	N/A	Intrahepatic
chol_msk_2018	P-0000713-T01-IM3	0	no alteration	no alteration	no alteration	N/A	no alteration	no alteration	no alteration	N/A	no alteration	N/A	no alteration	no alteration	no alteration	no alteration	no alteration	no alteration	no alteration	N/A	46.751	DECEASED	84	N/A	N/A	Intrahepatic
chol_msk_2018	P-0000766-T01-IM3	1	no alteration	no alteration	G12C (driver)	N/A	no alteration	no alteration	no alteration	N/A	no alteration	N/A	no alteration	no alteration	no alteration	no alteration	no alteration	S1221N	no alteration	N/A	33.962	DECEASED	67	N/A	N/A	Intrahepatic
chol_msk_2018	P-0000932-T01-IM3	0	no alteration	no alteration	no alteration	N/A	no alteration	no alteration	no alteration	N/A	no alteration	N/A	no alteration	no alteration	no alteration	no alteration	no alteration	no alteration	no alteration	N/A	55.101	DECEASED	89	N/A	N/A	Intrahepatic
chol_msk_2018	P-0001001-T01-IM3	1	no alteration	no alteration	no alteration	N/A	no alteration	no alteration	no alteration	N/A	S310F (driver)	N/A	no alteration	no alteration	no alteration	no alteration	no alteration	no alteration	no alteration	N/A	13.085	DECEASED	77	N/A	N/A	Intrahepatic
chol_msk_2018	P-0001013-T01-IM3	1	no alteration	no alteration	G12D (driver)	N/A	no alteration	no alteration	no alteration	N/A	no alteration	N/A	no alteration	no alteration	no alteration	no alteration	no alteration	no alteration	no alteration	N/A	32.285	DECEASED	80	N/A	N/A	Extrahepatic
chol_msk_2018	P-0001185-T01-IM3	1	C229Yfs*10 (driver)	F2141Sfs*59 (driver), S11Afs*91 (driver)	no alteration	N/A	no alteration	R108H (driver)	K511Nfs*9 (driver)	N/A	no alteration	N/A	no alteration	no alteration	no alteration	no alteration	no alteration	no alteration	no alteration	N/A	11.704	DECEASED	51	N/A	N/A	Intrahepatic
chol_msk_2018	P-0001292-T01-IM3	1	no alteration	G276* (driver)	no alteration	N/A	no alteration	no alteration	no alteration	N/A	no alteration	N/A	G469V (driver)	R103C	no alteration	no alteration	no alteration	no alteration	no alteration	N/A	17.786	DECEASED	63	N/A	N/A	Intrahepatic
chol_msk_2018	P-0001359-T01-IM3	1	no alteration	no alteration	no alteration	N/A	no alteration	no alteration	no alteration	N/A	no alteration	N/A	no alteration	no alteration	no alteration	no alteration	no alteration	no alteration	Q61R (driver)	N/A	254.235	DECEASED	61	N/A	N/A	Intrahepatic
chol_msk_2018	P-0001403-T01-IM3	0	no alteration	no alteration	no alteration	N/A	no alteration	no alteration	no alteration	N/A	no alteration	N/A	no alteration	no alteration	no alteration	no alteration	no alteration	no alteration	no alteration	N/A	61.907	LIVING	53	N/A	N/A	Intrahepatic
chol_msk_2018	P-0001496-T01-IM3	0	no alteration	no alteration	no alteration	N/A	no alteration	no alteration	no alteration	N/A	no alteration	N/A	no alteration	no alteration	no alteration	no alteration	no alteration	no alteration	no alteration	N/A	36.164	DECEASED	35	N/A	N/A	Intrahepatic
chol_msk_2018	P-0001539-T01-IM3	1	no alteration	no alteration	no alteration	N/A	STK11-intragenic	no alteration	no alteration	N/A	no alteration	N/A	no alteration	no alteration	no alteration	no alteration	no alteration	no alteration	no alteration	N/A	142.093	DECEASED	70	N/A	N/A	Intrahepatic
chol_msk_2018	P-0001638-T01-IM3	1	no alteration	V2132Gfs*17 (driver)	no alteration	N/A	no alteration	no alteration	no alteration	N/A	no alteration	N/A	no alteration	no alteration	I654T, FGFR2-KIAA1217 fusion	no alteration	no alteration	no alteration	no alteration	N/A	12.197	DECEASED	60	N/A	N/A	Intrahepatic
chol_msk_2018	P-0001824-T01-IM3	1	no alteration	no alteration	G12V (driver)	N/A	no alteration	no alteration	no alteration	N/A	no alteration	N/A	no alteration	no alteration	no alteration	no alteration	no alteration	no alteration	no alteration	N/A	68.712	DECEASED	66	N/A	N/A	Intrahepatic
chol_msk_2018	P-0001858-T01-IM3	0	no alteration	no alteration	no alteration	N/A	no alteration	no alteration	no alteration	N/A	no alteration	N/A	no alteration	no alteration	no alteration	no alteration	no alteration	no alteration	no alteration	N/A	81.205	DECEASED	51	N/A	N/A	Intrahepatic
chol_msk_2018	P-0001933-T01-IM3	1	no alteration	X1289_splice (driver)	no alteration	N/A	no alteration	no alteration	no alteration	N/A	no alteration	N/A	no alteration	no alteration	no alteration	no alteration	no alteration	no alteration	no alteration	N/A	32.153	DECEASED	75	N/A	N/A	Intrahepatic
chol_msk_2018	P-0002039-T01-IM3	1	no alteration	no alteration	no alteration	N/A	no alteration	no alteration	no alteration	N/A	no alteration	N/A	no alteration	no alteration	RASAL2-FGFR2 fusion, TACC2-FGFR2 fusion	no alteration	no alteration	no alteration	no alteration	N/A	34.619	LIVING	44	N/A	N/A	Intrahepatic
chol_msk_2018	P-0002059-T01-IM3	0	no alteration	no alteration	no alteration	N/A	no alteration	no alteration	no alteration	N/A	no alteration	N/A	no alteration	no alteration	no alteration	no alteration	no alteration	no alteration	no alteration	N/A	41.194	DECEASED	71	N/A	N/A	Intrahepatic
chol_msk_2018	P-0002064-T01-IM3	0	no alteration	no alteration	no alteration	N/A	no alteration	no alteration	no alteration	N/A	no alteration	N/A	no alteration	no alteration	no alteration	no alteration	no alteration	no alteration	no alteration	N/A	88.011	LIVING	73	N/A	N/A	Intrahepatic
chol_msk_2018	P-0002119-T02-IM5	1	V274A (driver)	no alteration	no alteration	N/A	no alteration	C420R (driver)	no alteration	N/A	no alteration	N/A	no alteration	no alteration	no alteration	no alteration	X70_splice (driver)	no alteration	no alteration	N/A	104.548	DECEASED	63	N/A	N/A	Intrahepatic
chol_msk_2018	P-0002135-T01-IM3	0	no alteration	no alteration	no alteration	N/A	no alteration	no alteration	no alteration	N/A	no alteration	N/A	no alteration	no alteration	no alteration	no alteration	no alteration	no alteration	no alteration	N/A	76.866	DECEASED	70	N/A	N/A	Intrahepatic
chol_msk_2018	P-0002143-T01-IM3	1	no alteration	E1763* (driver)	Q61H (driver)	N/A	no alteration	no alteration	no alteration	N/A	no alteration	N/A	no alteration	no alteration	no alteration	no alteration	no alteration	no alteration	no alteration	N/A	52.899	DECEASED	63	N/A	N/A	Intrahepatic
chol_msk_2018	P-0002211-T01-IM3	1	no alteration	Q2176Rfs*48 (driver)	no alteration	N/A	no alteration	no alteration	no alteration	N/A	no alteration	N/A	no alteration	no alteration	no alteration	no alteration	no alteration	no alteration	no alteration	N/A	16.57	DECEASED	42	N/A	N/A	Extrahepatic
chol_msk_2018	P-0002213-T01-IM3	1	X307_splice (driver)	no alteration	G12D (driver)	N/A	no alteration	no alteration	no alteration	N/A	no alteration	N/A	no alteration	no alteration	no alteration	no alteration	no alteration	no alteration	no alteration	N/A	10.027	DECEASED	77	N/A	N/A	Intrahepatic
chol_msk_2018	P-0002286-T01-IM3	1	no alteration	no alteration	no alteration	N/A	no alteration	E545K (driver), C420R (driver)	no alteration	N/A	no alteration	N/A	no alteration	no alteration	no alteration	no alteration	no alteration	no alteration	no alteration	N/A	17.918	DECEASED	78	N/A	N/A	Intrahepatic
chol_msk_2018	P-0002319-T01-IM3	1	no alteration	no alteration	G12V (driver)	N/A	no alteration	no alteration	no alteration	N/A	no alteration	N/A	no alteration	no alteration	no alteration	no alteration	no alteration	no alteration	no alteration	N/A	18.345	DECEASED	68	N/A	N/A	Extrahepatic
chol_msk_2018	P-0002666-T01-IM3	0	no alteration	no alteration	no alteration	N/A	no alteration	no alteration	no alteration	N/A	no alteration	N/A	no alteration	no alteration	no alteration	no alteration	no alteration	no alteration	no alteration	N/A	18.904	DECEASED	64	N/A	N/A	Intrahepatic
chol_msk_2018	P-0002675-T01-IM3	1	no alteration	no alteration	no alteration	N/A	no alteration	no alteration	no alteration	N/A	no alteration	N/A	no alteration	no alteration	FGFR2-BICC1 fusion	no alteration	no alteration	no alteration	no alteration	N/A	18.904	DECEASED	61	N/A	N/A	Intrahepatic
chol_msk_2018	P-0002906-T01-IM3	1	Q52* (driver)	no alteration	no alteration	N/A	no alteration	no alteration	no alteration	N/A	no alteration	N/A	no alteration	no alteration	no alteration	no alteration	no alteration	no alteration	no alteration	N/A	13.578	DECEASED	69	N/A	N/A	Intrahepatic
chol_msk_2018	P-0002937-T01-IM3	0	no alteration	no alteration	no alteration	N/A	no alteration	no alteration	no alteration	N/A	no alteration	N/A	no alteration	no alteration	no alteration	no alteration	no alteration	no alteration	no alteration	N/A	13.644	DECEASED	54	N/A	N/A	Intrahepatic
chol_msk_2018	P-0002944-T01-IM3	1	R273H (driver)	no alteration	no alteration	N/A	no alteration	no alteration	no alteration	N/A	no alteration	N/A	no alteration	no alteration	no alteration	no alteration	no alteration	no alteration	no alteration	N/A	19.299	LIVING	42	N/A	N/A	Extrahepatic
chol_msk_2018	P-0003160-T01-IM5	1	no alteration	no alteration	no alteration	N/A	E70* (driver)	no alteration	no alteration	N/A	no alteration	N/A	no alteration	no alteration	no alteration	no alteration	no alteration	no alteration	no alteration	N/A	37.611	LIVING	51	N/A	N/A	Intrahepatic
chol_msk_2018	P-0003177-T01-IM5	1	no alteration	no alteration	no alteration	N/A	no alteration	no alteration	no alteration	N/A	no alteration	N/A	no alteration	no alteration	FGFR2-BICC1 fusion	no alteration	no alteration	no alteration	no alteration	N/A	44.416	DECEASED	66	N/A	N/A	Intrahepatic
chol_msk_2018	P-0003187-T01-IM5	0	no alteration	no alteration	no alteration	N/A	no alteration	no alteration	no alteration	N/A	no alteration	N/A	no alteration	no alteration	no alteration	no alteration	no alteration	no alteration	no alteration	N/A	38.367	DECEASED	54	N/A	N/A	Intrahepatic
chol_msk_2018	P-0003214-T01-IM5	1	Q167* (driver)	no alteration	no alteration	N/A	no alteration	no alteration	no alteration	N/A	AMP (driver)	N/A	no alteration	no alteration	no alteration	no alteration	no alteration	no alteration	no alteration	N/A	16.077	DECEASED	77	N/A	N/A	Extrahepatic
chol_msk_2018	P-0003407-T01-IM5	1	X126_splice (driver)	no alteration	no alteration	N/A	no alteration	no alteration	no alteration	N/A	no alteration	N/A	no alteration	no alteration	no alteration	no alteration	no alteration	no alteration	no alteration	N/A	48.46	DECEASED	34	N/A	N/A	Extrahepatic
chol_msk_2018	P-0003473-T01-IM5	1	no alteration	no alteration	G12V (driver)	N/A	no alteration	no alteration	no alteration	N/A	no alteration	N/A	no alteration	no alteration	no alteration	no alteration	no alteration	no alteration	no alteration	N/A	81.107	DECEASED	76	N/A	N/A	Extrahepatic
chol_msk_2018	P-0003478-T01-IM5	1	no alteration	no alteration	no alteration	N/A	no alteration	no alteration	V226A	N/A	no alteration	N/A	no alteration	no alteration	no alteration	no alteration	no alteration	no alteration	no alteration	N/A	1.973	DECEASED	80	N/A	N/A	Intrahepatic
chol_msk_2018	P-0003503-T01-IM5	1	no alteration	no alteration	no alteration	N/A	R304W (driver)	no alteration	no alteration	N/A	no alteration	N/A	no alteration	no alteration	no alteration	no alteration	no alteration	no alteration	no alteration	N/A	9.863	DECEASED	78	N/A	N/A	Extrahepatic
chol_msk_2018	P-0003590-T01-IM5	1	no alteration	no alteration	no alteration	N/A	no alteration	no alteration	HOMDEL (driver)	N/A	no alteration	N/A	no alteration	no alteration	no alteration	no alteration	no alteration	no alteration	no alteration	N/A	52.767	DECEASED	77	N/A	N/A	Intrahepatic
chol_msk_2018	P-0003617-T01-IM5	0	no alteration	no alteration	no alteration	N/A	no alteration	no alteration	no alteration	N/A	no alteration	N/A	no alteration	no alteration	no alteration	no alteration	no alteration	no alteration	no alteration	N/A	18.444	DECEASED	73	N/A	N/A	Extrahepatic
chol_msk_2018	P-0003701-T01-IM5	0	no alteration	no alteration	no alteration	N/A	no alteration	no alteration	no alteration	N/A	no alteration	N/A	no alteration	no alteration	no alteration	no alteration	no alteration	no alteration	no alteration	N/A	14.137	DECEASED	62	N/A	N/A	Intrahepatic
chol_msk_2018	P-0003737-T01-IM5	1	no alteration	G1110Efs*51 (driver)	no alteration	N/A	no alteration	no alteration	no alteration	N/A	no alteration	N/A	no alteration	no alteration	no alteration	no alteration	no alteration	no alteration	no alteration	N/A	14.499	DECEASED	64	N/A	N/A	Intrahepatic
chol_msk_2018	P-0003795-T01-IM5	1	D281E (driver)	no alteration	no alteration	N/A	no alteration	no alteration	no alteration	N/A	no alteration	N/A	no alteration	no alteration	no alteration	no alteration	no alteration	no alteration	no alteration	N/A	21.699	DECEASED	63	N/A	N/A	Intrahepatic
chol_msk_2018	P-0003812-T01-IM5	1	P36Afs*7 (driver)	R1721* (driver)	no alteration	N/A	no alteration	R108H (driver)	no alteration	N/A	no alteration	N/A	no alteration	no alteration	no alteration	no alteration	no alteration	no alteration	no alteration	N/A	26.663	DECEASED	46	N/A	N/A	Intrahepatic
chol_msk_2018	P-0003898-T01-IM5	1	no alteration	no alteration	AMP (driver)	N/A	no alteration	AMP (driver)	no alteration	N/A	AMP (driver)	N/A	no alteration	no alteration	no alteration	no alteration	no alteration	no alteration	no alteration	N/A	18.97	LIVING	33	N/A	N/A	Extrahepatic
chol_msk_2018	P-0003938-T01-IM5	1	L137Q (driver)	Y1027_L1028delins* (driver)	no alteration	N/A	no alteration	no alteration	no alteration	N/A	no alteration	N/A	no alteration	no alteration	no alteration	no alteration	no alteration	no alteration	no alteration	N/A	21.764	DECEASED	67	N/A	N/A	Intrahepatic
chol_msk_2018	P-0003946-T01-IM3	0	no alteration	no alteration	no alteration	N/A	no alteration	no alteration	no alteration	N/A	no alteration	N/A	no alteration	no alteration	no alteration	no alteration	no alteration	no alteration	no alteration	N/A	111.156	LIVING	78	N/A	N/A	Intrahepatic
chol_msk_2018	P-0003984-T01-IM5	1	A70Rfs*76 (driver)	no alteration	no alteration	N/A	no alteration	no alteration	no alteration	N/A	no alteration	N/A	no alteration	no alteration	no alteration	no alteration	no alteration	no alteration	no alteration	N/A	100.372	LIVING	67	N/A	N/A	Extrahepatic
chol_msk_2018	P-0004080-T01-IM5	0	no alteration	no alteration	no alteration	N/A	no alteration	no alteration	no alteration	N/A	no alteration	N/A	no alteration	no alteration	no alteration	no alteration	no alteration	no alteration	no alteration	N/A	206.071	LIVING	77	N/A	N/A	Intrahepatic
chol_msk_2018	P-0004252-T01-IM5	1	L43* (driver)	no alteration	no alteration	N/A	no alteration	no alteration	no alteration	N/A	no alteration	N/A	no alteration	no alteration	no alteration	no alteration	no alteration	no alteration	no alteration	N/A	217.15	DECEASED	54	N/A	N/A	Intrahepatic
chol_msk_2018	P-0004520-T01-IM5	1	no alteration	no alteration	no alteration	N/A	no alteration	no alteration	no alteration	N/A	no alteration	N/A	no alteration	no alteration	FGFR2-BICC1 fusion	no alteration	no alteration	no alteration	no alteration	N/A	87.551	LIVING	70	N/A	N/A	Intrahepatic
chol_msk_2018	P-0004534-T01-IM5	1	V97Sfs*26 (driver)	no alteration	no alteration	N/A	no alteration	no alteration	no alteration	N/A	no alteration	N/A	no alteration	no alteration	no alteration	no alteration	no alteration	no alteration	no alteration	N/A	19.397	DECEASED	64	N/A	N/A	Extrahepatic
chol_msk_2018	P-0004535-T01-IM5	0	no alteration	no alteration	no alteration	N/A	no alteration	no alteration	no alteration	N/A	no alteration	N/A	no alteration	no alteration	no alteration	no alteration	no alteration	no alteration	no alteration	N/A	72.92	LIVING	80	N/A	N/A	Intrahepatic
chol_msk_2018	P-0004547-T01-IM5	1	no alteration	X1709_splice (driver)	no alteration	N/A	no alteration	no alteration	no alteration	N/A	no alteration	N/A	no alteration	no alteration	no alteration	no alteration	no alteration	no alteration	no alteration	N/A	27.715	LIVING	63	N/A	N/A	Intrahepatic
chol_msk_2018	P-0004779-T01-IM5	1	V157A (driver)	no alteration	no alteration	N/A	no alteration	no alteration	no alteration	N/A	no alteration	N/A	no alteration	no alteration	no alteration	no alteration	no alteration	no alteration	no alteration	N/A	44.712	LIVING	67	N/A	N/A	Intrahepatic
chol_msk_2018	P-0004955-T01-IM5	1	no alteration	no alteration	no alteration	N/A	no alteration	no alteration	no alteration	N/A	no alteration	N/A	no alteration	no alteration	no alteration	no alteration	no alteration	no alteration	Q61R (driver)	N/A	8.877	DECEASED	45	N/A	N/A	Intrahepatic
chol_msk_2018	P-0005000-T01-IM5	1	no alteration	Q1614* (driver)	no alteration	N/A	no alteration	no alteration	no alteration	N/A	no alteration	N/A	no alteration	no alteration	no alteration	no alteration	no alteration	no alteration	no alteration	N/A	65.556	DECEASED	77	N/A	N/A	Intrahepatic
chol_msk_2018	P-0005007-T01-IM5	1	no alteration	no alteration	Q61L (driver)	N/A	no alteration	no alteration	no alteration	N/A	no alteration	N/A	no alteration	no alteration	no alteration	no alteration	no alteration	no alteration	no alteration	N/A	16.603	DECEASED	81	N/A	N/A	Extrahepatic
chol_msk_2018	P-0005027-T01-IM5	1	V147G (driver)	no alteration	no alteration	N/A	no alteration	no alteration	no alteration	N/A	no alteration	N/A	no alteration	no alteration	no alteration	no alteration	no alteration	no alteration	no alteration	N/A	19.003	LIVING	69	N/A	N/A	Extrahepatic
chol_msk_2018	P-0005057-T02-IM5	1	no alteration	no alteration	G12V (driver)	N/A	no alteration	no alteration	no alteration	N/A	no alteration	N/A	no alteration	no alteration	no alteration	no alteration	no alteration	no alteration	no alteration	N/A	20.975	DECEASED	48	N/A	N/A	Extrahepatic
chol_msk_2018	P-0005112-T01-IM5	0	no alteration	no alteration	no alteration	N/A	no alteration	no alteration	no alteration	N/A	no alteration	N/A	no alteration	no alteration	no alteration	no alteration	no alteration	no alteration	no alteration	N/A	42.312	LIVING	65	N/A	N/A	Intrahepatic
chol_msk_2018	P-0005140-T01-IM5	1	no alteration	no alteration	no alteration	N/A	no alteration	no alteration	no alteration	N/A	no alteration	N/A	no alteration	no alteration	FGFR2-FAM13C fusion	no alteration	no alteration	no alteration	no alteration	N/A	25.841	DECEASED	61	N/A	N/A	Intrahepatic
chol_msk_2018	P-0005161-T01-IM5	1	no alteration	Q449Afs*173 (driver)	no alteration	N/A	no alteration	no alteration	no alteration	N/A	no alteration	N/A	no alteration	no alteration	AMP (driver)	no alteration	no alteration	no alteration	no alteration	N/A	27.551	DECEASED	55	N/A	N/A	Intrahepatic
chol_msk_2018	P-0005255-T01-IM5	0	no alteration	no alteration	no alteration	N/A	no alteration	no alteration	no alteration	N/A	no alteration	N/A	no alteration	no alteration	no alteration	no alteration	no alteration	no alteration	no alteration	N/A	15.058	LIVING	74	N/A	N/A	Intrahepatic
chol_msk_2018	P-0005291-T01-IM5	1	no alteration	no alteration	no alteration	N/A	no alteration	no alteration	F541C	N/A	no alteration	N/A	no alteration	no alteration	TFEC-FGFR2 fusion	no alteration	no alteration	no alteration	no alteration	N/A	5.753	DECEASED	72	N/A	N/A	Intrahepatic
chol_msk_2018	P-0005345-T01-IM5	0	no alteration	no alteration	no alteration	N/A	no alteration	no alteration	no alteration	N/A	no alteration	N/A	no alteration	no alteration	no alteration	no alteration	no alteration	no alteration	no alteration	N/A	31.726	DECEASED	85	N/A	N/A	Intrahepatic
chol_msk_2018	P-0005400-T01-IM5	1	no alteration	D1850Gfs*4 (driver), Q372Afs*28 (driver)	no alteration	N/A	no alteration	no alteration	no alteration	N/A	no alteration	N/A	no alteration	no alteration	no alteration	no alteration	no alteration	no alteration	no alteration	N/A	53.523	DECEASED	56	N/A	N/A	Extrahepatic
chol_msk_2018	P-0005420-T01-IM5	1	R282W (driver)	no alteration	no alteration	N/A	no alteration	no alteration	no alteration	N/A	no alteration	N/A	no alteration	no alteration	no alteration	no alteration	no alteration	no alteration	no alteration	N/A	70.915	LIVING	51	N/A	N/A	Extrahepatic
chol_msk_2018	P-0005520-T01-IM5	1	no alteration	W1498* (driver)	no alteration	N/A	no alteration	no alteration	no alteration	N/A	no alteration	N/A	no alteration	no alteration	no alteration	no alteration	no alteration	no alteration	no alteration	N/A	188.679	DECEASED	75	N/A	N/A	Intrahepatic
chol_msk_2018	P-0005538-T01-IM5	1	P13Lfs*2 (driver)	no alteration	no alteration	N/A	no alteration	no alteration	no alteration	N/A	no alteration	N/A	no alteration	no alteration	FGFR2-BICC1 fusion	no alteration	no alteration	no alteration	no alteration	N/A	18.148	DECEASED	44	N/A	N/A	Intrahepatic
chol_msk_2018	P-0005561-T01-IM5	0	no alteration	no alteration	no alteration	N/A	no alteration	no alteration	no alteration	N/A	no alteration	N/A	no alteration	no alteration	no alteration	no alteration	no alteration	no alteration	no alteration	N/A	36.921	LIVING	55	N/A	N/A	Intrahepatic
chol_msk_2018	P-0005597-T01-IM5	1	no alteration	no alteration	G12V (driver)	N/A	no alteration	no alteration	no alteration	N/A	no alteration	N/A	no alteration	no alteration	no alteration	no alteration	no alteration	no alteration	no alteration	N/A	17.227	DECEASED	67	N/A	N/A	Extrahepatic
chol_msk_2018	P-0005647-T01-IM5	1	no alteration	no alteration	no alteration	N/A	K84del	no alteration	G89Efs*7 (driver), G149Afs*25 (driver)	N/A	no alteration	N/A	no alteration	no alteration	no alteration	no alteration	no alteration	no alteration	no alteration	N/A	48.329	DECEASED	71	N/A	N/A	Extrahepatic
chol_msk_2018	P-0005835-T01-IM5	1	E326Dfs*6 (driver)	no alteration	no alteration	N/A	no alteration	no alteration	no alteration	N/A	no alteration	N/A	no alteration	no alteration	no alteration	no alteration	no alteration	no alteration	no alteration	N/A	21.567	DECEASED	61	N/A	N/A	Intrahepatic
chol_msk_2018	P-0005944-T01-IM5	0	no alteration	no alteration	no alteration	N/A	no alteration	no alteration	no alteration	N/A	no alteration	N/A	no alteration	no alteration	no alteration	no alteration	no alteration	no alteration	no alteration	N/A	72.329	DECEASED	46	N/A	N/A	Extrahepatic
chol_msk_2018	P-0006061-T01-IM5	1	no alteration	no alteration	Q61H (driver)	N/A	W308* (driver)	no alteration	no alteration	N/A	no alteration	N/A	no alteration	no alteration	no alteration	no alteration	no alteration	no alteration	no alteration	N/A	35.474	DECEASED	68	N/A	N/A	Extrahepatic
chol_msk_2018	P-0006083-T01-IM5	1	no alteration	N1040Cfs*18 (driver)	no alteration	N/A	no alteration	no alteration	no alteration	N/A	no alteration	N/A	no alteration	no alteration	no alteration	no alteration	no alteration	no alteration	no alteration	N/A	9.403	LIVING	70	N/A	N/A	Intrahepatic
chol_msk_2018	P-0006087-T01-IM5	0	no alteration	no alteration	no alteration	N/A	no alteration	no alteration	no alteration	N/A	no alteration	N/A	no alteration	no alteration	no alteration	no alteration	no alteration	no alteration	no alteration	N/A	12.888	DECEASED	42	N/A	N/A	Intrahepatic
chol_msk_2018	P-0006176-T01-IM5	1	no alteration	no alteration	no alteration	N/A	no alteration	no alteration	no alteration	N/A	no alteration	N/A	V600E (driver)	no alteration	no alteration	no alteration	no alteration	no alteration	no alteration	N/A	14.301	DECEASED	68	N/A	N/A	Intrahepatic
chol_msk_2018	P-0006186-T01-IM5	1	R273H (driver)	no alteration	G12D (driver)	N/A	no alteration	no alteration	no alteration	N/A	no alteration	N/A	no alteration	no alteration	no alteration	no alteration	no alteration	no alteration	no alteration	N/A	152.285	DECEASED	75	N/A	N/A	Extrahepatic
chol_msk_2018	P-0006235-T01-IM5	1	no alteration	no alteration	no alteration	N/A	no alteration	no alteration	no alteration	N/A	no alteration	N/A	no alteration	no alteration	FGFR2-ROCK1 fusion	no alteration	no alteration	no alteration	no alteration	N/A	145.019	DECEASED	58	N/A	N/A	Intrahepatic
chol_msk_2018	P-0006242-T01-IM5	0	no alteration	no alteration	no alteration	N/A	no alteration	no alteration	no alteration	N/A	no alteration	N/A	no alteration	no alteration	no alteration	no alteration	no alteration	no alteration	no alteration	N/A	38.729	LIVING	70	N/A	N/A	Intrahepatic
chol_msk_2018	P-0006244-T01-IM5	1	no alteration	no alteration	no alteration	N/A	no alteration	no alteration	no alteration	N/A	AMP (driver)	N/A	no alteration	no alteration	no alteration	no alteration	no alteration	no alteration	no alteration	N/A	27.452	DECEASED	66	N/A	N/A	Intrahepatic
chol_msk_2018	P-0006328-T01-IM5	1	no alteration	no alteration	no alteration	N/A	no alteration	no alteration	no alteration	N/A	no alteration	N/A	no alteration	no alteration	FGFR2-NRBF2 fusion	no alteration	no alteration	no alteration	no alteration	N/A	40.241	LIVING	64	N/A	N/A	Intrahepatic
chol_msk_2018	P-0006352-T01-IM5	1	no alteration	no alteration	G12D (driver)	N/A	no alteration	no alteration	no alteration	N/A	no alteration	N/A	no alteration	no alteration	no alteration	no alteration	no alteration	no alteration	no alteration	N/A	1.874	LIVING	40	N/A	N/A	Extrahepatic
chol_msk_2018	P-0006353-T01-IM5	1	no alteration	W1844Gfs*39 (driver), F266* (driver)	no alteration	N/A	no alteration	no alteration	no alteration	N/A	no alteration	N/A	no alteration	no alteration	no alteration	no alteration	no alteration	no alteration	no alteration	N/A	4.471	DECEASED	69	N/A	N/A	Intrahepatic
chol_msk_2018	P-0006450-T01-IM5	1	R342* (driver)	no alteration	no alteration	N/A	no alteration	no alteration	T60Kfs*14 (driver)	N/A	no alteration	N/A	no alteration	no alteration	no alteration	no alteration	no alteration	no alteration	no alteration	N/A	N/A	N/A	N/A	N/A	N/A	N/A
chol_msk_2018	P-0006450-T02-IM5	1	R342* (driver)	K2020* (driver)	no alteration	N/A	no alteration	no alteration	T60Kfs*14 (driver)	N/A	no alteration	N/A	no alteration	no alteration	no alteration	no alteration	no alteration	no alteration	no alteration	N/A	N/A	N/A	N/A	N/A	N/A	N/A
chol_msk_2018	P-0006553-T01-IM5	1	no alteration	no alteration	no alteration	N/A	no alteration	no alteration	L205Kfs*4 (driver)	N/A	no alteration	N/A	no alteration	no alteration	no alteration	no alteration	no alteration	no alteration	no alteration	N/A	176.548	DECEASED	81	N/A	N/A	Intrahepatic
chol_msk_2018	P-0006583-T01-IM5	1	C277F (driver)	Q1131Pfs*62 (driver)	G12V (driver)	N/A	no alteration	no alteration	no alteration	N/A	no alteration	N/A	no alteration	no alteration	no alteration	no alteration	no alteration	no alteration	no alteration	N/A	448.668	DECEASED	66	N/A	N/A	Intrahepatic
chol_msk_2018	P-0006795-T01-IM5	1	N210Kfs*6 (driver)	no alteration	no alteration	N/A	no alteration	no alteration	no alteration	N/A	no alteration	N/A	no alteration	no alteration	no alteration	no alteration	no alteration	no alteration	no alteration	N/A	147.189	LIVING	64	N/A	N/A	Intrahepatic
chol_msk_2018	P-0006871-T01-IM5	0	no alteration	no alteration	no alteration	N/A	no alteration	no alteration	no alteration	N/A	no alteration	N/A	no alteration	no alteration	no alteration	no alteration	no alteration	no alteration	no alteration	N/A	6.871	DECEASED	75	N/A	N/A	Intrahepatic
chol_msk_2018	P-0006903-T01-IM5	1	no alteration	Y1055Lfs*50 (driver)	no alteration	N/A	no alteration	no alteration	no alteration	N/A	no alteration	N/A	no alteration	no alteration	no alteration	no alteration	no alteration	no alteration	no alteration	N/A	188.055	LIVING	77	N/A	N/A	Intrahepatic
chol_msk_2018	P-0007016-T01-IM5	1	no alteration	no alteration	Q61H (driver)	N/A	no alteration	no alteration	no alteration	N/A	no alteration	N/A	no alteration	no alteration	no alteration	no alteration	no alteration	no alteration	no alteration	N/A	44.975	LIVING	56	N/A	N/A	Intrahepatic
chol_msk_2018	P-0007023-T01-IM5	0	no alteration	no alteration	no alteration	N/A	no alteration	no alteration	no alteration	N/A	no alteration	N/A	no alteration	no alteration	no alteration	no alteration	no alteration	no alteration	no alteration	N/A	28.734	DECEASED	55	N/A	N/A	Intrahepatic
chol_msk_2018	P-0007041-T01-IM5	1	C176Y (driver), H178P (driver)	no alteration	no alteration	N/A	no alteration	no alteration	no alteration	N/A	no alteration	N/A	no alteration	no alteration	no alteration	no alteration	no alteration	no alteration	no alteration	N/A	40.044	DECEASED	66	N/A	N/A	Intrahepatic
chol_msk_2018	P-0007095-T01-IM5	1	X332_splice (driver)	no alteration	no alteration	N/A	no alteration	no alteration	X566_splice (driver)	N/A	no alteration	N/A	D594N (driver)	no alteration	no alteration	no alteration	no alteration	no alteration	no alteration	N/A	46.685	DECEASED	68	N/A	N/A	Extrahepatic
chol_msk_2018	P-0007107-T01-IM5	1	no alteration	no alteration	no alteration	N/A	no alteration	E545K (driver)	no alteration	N/A	no alteration	N/A	no alteration	no alteration	no alteration	no alteration	no alteration	no alteration	no alteration	N/A	42.411	LIVING	49	N/A	N/A	Intrahepatic
chol_msk_2018	P-0007205-T01-IM5	1	TP53-SHBG fusion	no alteration	no alteration	N/A	no alteration	no alteration	no alteration	N/A	no alteration	N/A	no alteration	no alteration	no alteration	no alteration	no alteration	no alteration	no alteration	N/A	8.712	DECEASED	55	N/A	N/A	Intrahepatic
chol_msk_2018	P-0007213-T01-IM5	1	no alteration	E1783Sfs*8 (driver)	no alteration	N/A	no alteration	E545K (driver)	no alteration	N/A	no alteration	N/A	no alteration	no alteration	no alteration	no alteration	no alteration	no alteration	no alteration	N/A	10.455	DECEASED	77	N/A	N/A	Intrahepatic
chol_msk_2018	P-0007271-T01-IM5	1	Y205H (driver)	no alteration	Q61H (driver)	N/A	no alteration	no alteration	no alteration	N/A	no alteration	N/A	no alteration	no alteration	no alteration	no alteration	no alteration	no alteration	no alteration	N/A	110.729	DECEASED	67	N/A	N/A	Extrahepatic
chol_msk_2018	P-0007275-T01-IM5	1	no alteration	R750* (driver)	no alteration	N/A	no alteration	no alteration	no alteration	N/A	no alteration	N/A	no alteration	no alteration	no alteration	no alteration	no alteration	no alteration	G12D (driver)	N/A	10.784	LIVING	82	N/A	N/A	Intrahepatic
chol_msk_2018	P-0007298-T01-IM5	1	G245S (driver)	Q1095del	no alteration	N/A	no alteration	no alteration	no alteration	N/A	no alteration	N/A	no alteration	no alteration	no alteration	no alteration	no alteration	no alteration	no alteration	N/A	46.06	LIVING	70	N/A	N/A	Extrahepatic
chol_msk_2018	P-0007385-T01-IM5	1	no alteration	Q1430* (driver)	G12S (driver)	N/A	no alteration	no alteration	no alteration	N/A	no alteration	N/A	no alteration	no alteration	no alteration	no alteration	no alteration	no alteration	no alteration	N/A	14.071	DECEASED	72	N/A	N/A	Extrahepatic
chol_msk_2018	P-0007417-T01-IM5	0	no alteration	no alteration	no alteration	N/A	no alteration	no alteration	no alteration	N/A	no alteration	N/A	no alteration	no alteration	no alteration	no alteration	no alteration	no alteration	no alteration	N/A	171.945	DECEASED	74	N/A	N/A	Intrahepatic
chol_msk_2018	P-0007426-T01-IM5	1	D259Y (driver)	no alteration	Q61H (driver)	N/A	no alteration	no alteration	no alteration	N/A	no alteration	N/A	no alteration	no alteration	no alteration	no alteration	no alteration	no alteration	no alteration	N/A	12.164	DECEASED	73	N/A	N/A	Intrahepatic
chol_msk_2018	P-0007510-T01-IM5	0	no alteration	no alteration	no alteration	N/A	no alteration	no alteration	no alteration	N/A	no alteration	N/A	no alteration	no alteration	no alteration	no alteration	no alteration	no alteration	no alteration	N/A	42.575	LIVING	55	N/A	N/A	Intrahepatic
chol_msk_2018	P-0007520-T01-IM5	0	no alteration	no alteration	no alteration	N/A	no alteration	no alteration	no alteration	N/A	no alteration	N/A	no alteration	no alteration	no alteration	no alteration	no alteration	no alteration	no alteration	N/A	27.682	DECEASED	62	N/A	N/A	Intrahepatic
chol_msk_2018	P-0007599-T01-IM5	0	no alteration	no alteration	no alteration	N/A	no alteration	no alteration	no alteration	N/A	no alteration	N/A	no alteration	no alteration	no alteration	no alteration	no alteration	no alteration	no alteration	N/A	6.411	DECEASED	42	N/A	N/A	Intrahepatic
chol_msk_2018	P-0007668-T01-IM5	0	no alteration	no alteration	no alteration	N/A	no alteration	no alteration	no alteration	N/A	no alteration	N/A	no alteration	no alteration	no alteration	no alteration	no alteration	no alteration	no alteration	N/A	104.581	DECEASED	68	N/A	N/A	Intrahepatic
chol_msk_2018	P-0007703-T01-IM5	0	no alteration	no alteration	no alteration	N/A	no alteration	no alteration	no alteration	N/A	no alteration	N/A	no alteration	no alteration	no alteration	no alteration	no alteration	no alteration	no alteration	N/A	12.197	DECEASED	69	N/A	N/A	Extrahepatic
chol_msk_2018	P-0007782-T01-IM5	1	E221Gfs*25 (driver), N239_S240delinsC (driver)	no alteration	no alteration	N/A	no alteration	no alteration	no alteration	N/A	no alteration	N/A	no alteration	no alteration	no alteration	no alteration	T167Ffs*15 (driver)	no alteration	no alteration	N/A	183.386	DECEASED	82	N/A	N/A	Intrahepatic
chol_msk_2018	P-0007784-T01-IM5	1	S166* (driver)	no alteration	no alteration	N/A	no alteration	no alteration	no alteration	N/A	AMP (driver)	N/A	no alteration	no alteration	no alteration	no alteration	no alteration	no alteration	no alteration	N/A	31.496	DECEASED	62	N/A	N/A	Extrahepatic
chol_msk_2018	P-0008020-T01-IM5	1	no alteration	no alteration	no alteration	N/A	no alteration	no alteration	no alteration	N/A	S310F (driver)	N/A	no alteration	no alteration	no alteration	no alteration	no alteration	no alteration	no alteration	N/A	8.153	DECEASED	58	N/A	N/A	Intrahepatic
chol_msk_2018	P-0008025-T01-IM5	1	K382Nfs*40 (driver)	G838* (driver)	no alteration	N/A	R147H	no alteration	no alteration	N/A	no alteration	N/A	no alteration	no alteration	no alteration	no alteration	no alteration	no alteration	no alteration	N/A	23.079	LIVING	27	N/A	N/A	Extrahepatic
chol_msk_2018	P-0008146-T01-IM5	1	no alteration	no alteration	no alteration	N/A	no alteration	no alteration	no alteration	N/A	no alteration	N/A	no alteration	no alteration	FGFR2-BICC1 fusion	no alteration	no alteration	no alteration	no alteration	N/A	3.912	LIVING	76	N/A	N/A	Intrahepatic
chol_msk_2018	P-0008182-T01-IM5	1	no alteration	no alteration	G13D (driver)	N/A	no alteration	no alteration	no alteration	N/A	no alteration	N/A	no alteration	no alteration	no alteration	no alteration	no alteration	no alteration	no alteration	N/A	5.655	DECEASED	52	N/A	N/A	Intrahepatic
chol_msk_2018	P-0008237-T01-IM5	0	no alteration	no alteration	no alteration	N/A	no alteration	no alteration	no alteration	N/A	no alteration	N/A	no alteration	no alteration	no alteration	no alteration	no alteration	no alteration	no alteration	N/A	169.775	DECEASED	54	N/A	N/A	Intrahepatic
chol_msk_2018	P-0008287-T01-IM5	1	no alteration	M1256Wfs*13 (driver)	no alteration	N/A	no alteration	no alteration	no alteration	N/A	no alteration	N/A	no alteration	no alteration	no alteration	no alteration	no alteration	no alteration	no alteration	N/A	3.649	LIVING	70	N/A	N/A	Intrahepatic
chol_msk_2018	P-0008648-T01-IM5	1	no alteration	M1497Vfs*5 (driver)	no alteration	N/A	no alteration	no alteration	no alteration	N/A	no alteration	N/A	no alteration	no alteration	no alteration	no alteration	no alteration	no alteration	no alteration	N/A	5.293	DECEASED	54	N/A	N/A	Intrahepatic
chol_msk_2018	P-0008658-T01-IM5	1	no alteration	no alteration	no alteration	N/A	no alteration	Q546K (driver)	no alteration	N/A	no alteration	N/A	no alteration	no alteration	FGFR2-KIAA1217 fusion	no alteration	no alteration	no alteration	no alteration	N/A	20.745	DECEASED	43	N/A	N/A	Intrahepatic
chol_msk_2018	P-0008684-T01-IM5	1	no alteration	no alteration	no alteration	N/A	no alteration	no alteration	no alteration	N/A	no alteration	N/A	A762V	no alteration	no alteration	no alteration	no alteration	no alteration	no alteration	N/A	21.797	DECEASED	36	N/A	N/A	Intrahepatic
chol_msk_2018	P-0008693-T01-IM5	1	no alteration	no alteration	no alteration	N/A	no alteration	no alteration	no alteration	N/A	no alteration	N/A	no alteration	no alteration	FGFR2-NRAP fusion	no alteration	no alteration	no alteration	no alteration	N/A	44.252	LIVING	48	N/A	N/A	Intrahepatic
chol_msk_2018	P-0008766-T01-IM5	1	R280K (driver)	A1239Vfs*30 (driver)	G12D (driver)	N/A	no alteration	no alteration	no alteration	N/A	no alteration	N/A	no alteration	no alteration	no alteration	no alteration	no alteration	no alteration	no alteration	N/A	8.515	DECEASED	74	N/A	N/A	Extrahepatic
chol_msk_2018	P-0009191-T01-IM5	1	M237Vfs*9 (driver)	no alteration	G12D (driver)	N/A	no alteration	no alteration	no alteration	N/A	no alteration	N/A	no alteration	no alteration	no alteration	no alteration	no alteration	no alteration	no alteration	N/A	17.721	DECEASED	74	N/A	N/A	Intrahepatic
chol_msk_2018	P-0009306-T01-IM5	1	no alteration	no alteration	no alteration	N/A	no alteration	E545K (driver)	no alteration	N/A	AMP (driver)	N/A	no alteration	no alteration	no alteration	no alteration	no alteration	no alteration	no alteration	N/A	23.31	LIVING	59	N/A	N/A	Intrahepatic
chol_msk_2018	P-0009512-T01-IM5	1	no alteration	no alteration	no alteration	N/A	no alteration	no alteration	no alteration	N/A	no alteration	N/A	no alteration	no alteration	FGFR2-BICC1 fusion	no alteration	no alteration	no alteration	no alteration	N/A	139.66	LIVING	57	N/A	N/A	Intrahepatic
chol_msk_2018	P-0009513-T01-IM5	0	no alteration	no alteration	no alteration	N/A	no alteration	no alteration	no alteration	N/A	no alteration	N/A	no alteration	no alteration	no alteration	no alteration	no alteration	no alteration	no alteration	N/A	84.953	DECEASED	78	N/A	N/A	Intrahepatic
chol_msk_2018	P-0009523-T01-IM5	1	G266E (driver)	no alteration	no alteration	N/A	no alteration	no alteration	no alteration	N/A	no alteration	N/A	no alteration	no alteration	no alteration	no alteration	no alteration	no alteration	no alteration	N/A	18.608	DECEASED	35	N/A	N/A	Intrahepatic
chol_msk_2018	P-0009596-T01-IM5	1	no alteration	no alteration	AMP (driver)	N/A	no alteration	no alteration	no alteration	N/A	no alteration	N/A	no alteration	no alteration	W290R (driver)	no alteration	no alteration	no alteration	no alteration	N/A	38.137	LIVING	75	N/A	N/A	Intrahepatic
chol_msk_2018	P-0009611-T01-IM5	0	no alteration	no alteration	no alteration	N/A	no alteration	no alteration	no alteration	N/A	no alteration	N/A	no alteration	no alteration	no alteration	no alteration	no alteration	no alteration	no alteration	N/A	536.975	LIVING	51	N/A	N/A	Intrahepatic
chol_msk_2018	P-0009694-T01-IM5	1	R273H (driver)	no alteration	no alteration	N/A	no alteration	no alteration	no alteration	N/A	no alteration	N/A	BRAF-PRKAR1B fusion	no alteration	no alteration	no alteration	no alteration	no alteration	no alteration	N/A	15.518	DECEASED	62	N/A	N/A	Extrahepatic
chol_msk_2018	P-0009816-T01-IM5	1	no alteration	no alteration	no alteration	N/A	no alteration	no alteration	no alteration	N/A	no alteration	N/A	V600E (driver)	no alteration	no alteration	no alteration	no alteration	no alteration	no alteration	N/A	75.353	DECEASED	56	N/A	N/A	Intrahepatic
chol_msk_2018	P-0009825-T01-IM5	1	no alteration	no alteration	no alteration	N/A	no alteration	E542K (driver)	no alteration	N/A	no alteration	N/A	G11S	no alteration	no alteration	no alteration	no alteration	no alteration	no alteration	N/A	39.584	LIVING	72	N/A	N/A	Intrahepatic
chol_msk_2018	P-0009916-T01-IM5	1	no alteration	F1750Lfs*20 (driver)	no alteration	N/A	no alteration	no alteration	no alteration	N/A	no alteration	N/A	no alteration	no alteration	no alteration	no alteration	no alteration	no alteration	no alteration	N/A	50.203	LIVING	60	N/A	N/A	Intrahepatic
chol_msk_2018	P-0009961-T01-IM5	0	no alteration	no alteration	no alteration	N/A	no alteration	no alteration	no alteration	N/A	no alteration	N/A	no alteration	no alteration	no alteration	no alteration	no alteration	no alteration	no alteration	N/A	6.082	LIVING	76	N/A	N/A	Intrahepatic
chol_msk_2018	P-0010016-T01-IM5	0	no alteration	no alteration	no alteration	N/A	no alteration	no alteration	no alteration	N/A	no alteration	N/A	no alteration	no alteration	no alteration	no alteration	no alteration	no alteration	no alteration	N/A	420.526	DECEASED	64	N/A	N/A	Intrahepatic
chol_msk_2018	P-0010070-T01-IM5	0	no alteration	no alteration	no alteration	N/A	no alteration	no alteration	no alteration	N/A	no alteration	N/A	no alteration	no alteration	no alteration	no alteration	no alteration	no alteration	no alteration	N/A	101.227	DECEASED	71	N/A	N/A	Intrahepatic
chol_msk_2018	P-0010102-T01-IM5	1	R337C (driver)	no alteration	no alteration	N/A	no alteration	no alteration	no alteration	N/A	no alteration	N/A	no alteration	no alteration	no alteration	no alteration	R173C (driver)	no alteration	no alteration	N/A	7.562	DECEASED	70	N/A	N/A	Extrahepatic
chol_msk_2018	P-0010280-T01-IM5	0	no alteration	no alteration	no alteration	N/A	no alteration	no alteration	no alteration	N/A	no alteration	N/A	no alteration	no alteration	no alteration	no alteration	no alteration	no alteration	no alteration	N/A	48.526	DECEASED	66	N/A	N/A	Extrahepatic
chol_msk_2018	P-0010299-T01-IM5	1	no alteration	no alteration	no alteration	N/A	no alteration	H1047R (driver)	no alteration	N/A	no alteration	N/A	no alteration	no alteration	no alteration	no alteration	no alteration	no alteration	no alteration	N/A	8.548	DECEASED	65	N/A	N/A	Intrahepatic
chol_msk_2018	P-0010331-T01-IM5	1	H115Y (driver)	K1072Nfs*21 (driver)	no alteration	N/A	no alteration	no alteration	no alteration	N/A	no alteration	N/A	no alteration	no alteration	no alteration	no alteration	no alteration	no alteration	no alteration	N/A	33.863	LIVING	46	N/A	N/A	Intrahepatic
chol_msk_2018	P-0010392-T01-IM5	0	no alteration	no alteration	no alteration	N/A	no alteration	no alteration	no alteration	N/A	no alteration	N/A	no alteration	no alteration	no alteration	no alteration	no alteration	no alteration	no alteration	N/A	113.194	DECEASED	53	N/A	N/A	Intrahepatic
chol_msk_2018	P-0010533-T01-IM5	1	no alteration	P1568Lfs*44 (driver)	no alteration	N/A	no alteration	no alteration	no alteration	N/A	no alteration	N/A	no alteration	no alteration	no alteration	no alteration	no alteration	no alteration	no alteration	N/A	34.521	LIVING	67	N/A	N/A	Intrahepatic
chol_msk_2018	P-0010574-T01-IM5	1	no alteration	D130Mfs*102 (driver)	no alteration	N/A	no alteration	no alteration	no alteration	N/A	no alteration	N/A	no alteration	no alteration	no alteration	no alteration	no alteration	no alteration	no alteration	N/A	11.342	DECEASED	70	N/A	N/A	Intrahepatic
chol_msk_2018	P-0010577-T01-IM5	0	no alteration	no alteration	no alteration	N/A	no alteration	no alteration	no alteration	N/A	no alteration	N/A	no alteration	no alteration	no alteration	no alteration	no alteration	no alteration	no alteration	N/A	76.734	DECEASED	75	N/A	N/A	Intrahepatic
chol_msk_2018	P-0010615-T01-IM5	1	no alteration	no alteration	no alteration	N/A	no alteration	E545K (driver)	no alteration	N/A	no alteration	N/A	no alteration	no alteration	no alteration	no alteration	no alteration	no alteration	no alteration	N/A	7.2	DECEASED	39	N/A	N/A	Intrahepatic
chol_msk_2018	P-0010701-T01-IM5	1	G266E (driver), R267Tfs*5 (driver)	no alteration	no alteration	N/A	no alteration	no alteration	HOMDEL (driver)	N/A	no alteration	N/A	no alteration	no alteration	no alteration	no alteration	no alteration	no alteration	no alteration	N/A	12.362	DECEASED	68	N/A	N/A	Intrahepatic
chol_msk_2018	P-0010723-T01-IM5	0	no alteration	no alteration	no alteration	N/A	no alteration	no alteration	no alteration	N/A	no alteration	N/A	no alteration	no alteration	no alteration	no alteration	no alteration	no alteration	no alteration	N/A	9.337	LIVING	75	N/A	N/A	Intrahepatic
chol_msk_2018	P-0010733-T01-IM5	1	no alteration	Q1584* (driver)	no alteration	N/A	no alteration	no alteration	no alteration	N/A	no alteration	N/A	no alteration	no alteration	no alteration	no alteration	no alteration	no alteration	no alteration	N/A	12.888	LIVING	66	N/A	N/A	Intrahepatic
chol_msk_2018	P-0010761-T01-IM5	1	no alteration	no alteration	no alteration	N/A	no alteration	no alteration	no alteration	N/A	no alteration	N/A	S116P	no alteration	FGFR2-PHC1 fusion	no alteration	no alteration	no alteration	no alteration	N/A	38.893	DECEASED	59	N/A	N/A	Intrahepatic
chol_msk_2018	P-0010851-T01-IM5	0	no alteration	no alteration	no alteration	N/A	no alteration	no alteration	no alteration	N/A	no alteration	N/A	no alteration	no alteration	no alteration	no alteration	no alteration	no alteration	no alteration	N/A	27.551	LIVING	51	N/A	N/A	Intrahepatic
chol_msk_2018	P-0011032-T01-IM5	1	no alteration	S1948Dfs*9 (driver)	no alteration	N/A	no alteration	no alteration	no alteration	N/A	no alteration	N/A	no alteration	no alteration	no alteration	no alteration	no alteration	no alteration	no alteration	N/A	4.175	DECEASED	65	N/A	N/A	Intrahepatic
chol_msk_2018	P-0011050-T01-IM5	0	no alteration	no alteration	no alteration	N/A	no alteration	no alteration	no alteration	N/A	no alteration	N/A	no alteration	no alteration	no alteration	no alteration	no alteration	no alteration	no alteration	N/A	57.205	DECEASED	59	N/A	N/A	Intrahepatic
chol_msk_2018	P-0011065-T01-IM5	1	R342* (driver)	no alteration	G12D (driver)	N/A	no alteration	no alteration	no alteration	N/A	no alteration	N/A	no alteration	no alteration	no alteration	no alteration	no alteration	no alteration	no alteration	N/A	12.395	DECEASED	64	N/A	N/A	Extrahepatic
chol_msk_2018	P-0011076-T01-IM5	1	no alteration	E1444* (driver)	no alteration	N/A	no alteration	no alteration	no alteration	N/A	no alteration	N/A	no alteration	no alteration	no alteration	no alteration	no alteration	no alteration	no alteration	N/A	69.764	DECEASED	70	N/A	N/A	Intrahepatic
chol_msk_2018	P-0011104-T01-IM5	1	no alteration	G801Vfs*32 (driver)	no alteration	N/A	no alteration	no alteration	no alteration	N/A	no alteration	N/A	K601E (driver)	no alteration	no alteration	no alteration	no alteration	no alteration	no alteration	N/A	40.899	LIVING	57	N/A	N/A	Intrahepatic
chol_msk_2018	P-0011140-T01-IM5	0	no alteration	no alteration	no alteration	N/A	no alteration	no alteration	no alteration	N/A	no alteration	N/A	no alteration	no alteration	no alteration	no alteration	no alteration	no alteration	no alteration	N/A	8.811	DECEASED	54	N/A	N/A	Intrahepatic
chol_msk_2018	P-0011194-T01-IM5	1	no alteration	no alteration	no alteration	N/A	no alteration	no alteration	no alteration	N/A	no alteration	N/A	P341T	no alteration	no alteration	no alteration	no alteration	no alteration	no alteration	N/A	39.584	DECEASED	61	N/A	N/A	Extrahepatic
chol_msk_2018	P-0011240-T01-IM5	1	E271* (driver)	no alteration	no alteration	N/A	no alteration	no alteration	no alteration	N/A	AMP (driver)	N/A	no alteration	no alteration	no alteration	no alteration	no alteration	no alteration	no alteration	N/A	34.652	LIVING	52	N/A	N/A	Intrahepatic
chol_msk_2018	P-0011394-T01-IM5	1	no alteration	no alteration	no alteration	N/A	no alteration	no alteration	no alteration	N/A	no alteration	N/A	no alteration	I68N	LAMC1-FGFR2 fusion, RABGAP1L-FGFR2 fusion	no alteration	no alteration	no alteration	no alteration	N/A	2.334	LIVING	45	N/A	N/A	Intrahepatic
chol_msk_2018	P-0011416-T01-IM5	1	no alteration	no alteration	no alteration	N/A	no alteration	no alteration	no alteration	N/A	no alteration	N/A	no alteration	no alteration	no alteration	no alteration	M35V (driver)	no alteration	no alteration	N/A	117.37	LIVING	68	N/A	N/A	Intrahepatic
chol_msk_2018	P-0011516-T01-IM5	1	no alteration	no alteration	no alteration	N/A	no alteration	no alteration	no alteration	N/A	no alteration	N/A	no alteration	no alteration	FGFR2-CTNNA3 fusion, FGFR2-SHC2 fusion	no alteration	no alteration	no alteration	no alteration	N/A	20.121	LIVING	56	N/A	N/A	Intrahepatic
chol_msk_2018	P-0011556-T01-IM5	1	no alteration	no alteration	no alteration	N/A	no alteration	no alteration	no alteration	N/A	no alteration	N/A	no alteration	no alteration	no alteration	no alteration	no alteration	no alteration	Q61R (driver)	N/A	26.531	DECEASED	67	N/A	N/A	Intrahepatic
chol_msk_2018	P-0011566-T01-IM5	1	no alteration	no alteration	no alteration	N/A	no alteration	no alteration	no alteration	N/A	no alteration	N/A	no alteration	no alteration	no alteration	no alteration	no alteration	no alteration	G13S (driver)	N/A	17.392	DECEASED	46	N/A	N/A	Intrahepatic
chol_msk_2018	P-0012003-T01-IM5	1	no alteration	no alteration	no alteration	N/A	no alteration	no alteration	no alteration	N/A	no alteration	N/A	no alteration	no alteration	C382R (driver)	no alteration	no alteration	no alteration	no alteration	N/A	7.463	LIVING	58	N/A	N/A	Intrahepatic
chol_msk_2018	P-0012155-T01-IM5	1	E286K (driver)	no alteration	no alteration	N/A	no alteration	R951H	no alteration	N/A	no alteration	N/A	no alteration	no alteration	no alteration	no alteration	no alteration	no alteration	no alteration	N/A	11.277	DECEASED	59	N/A	N/A	Intrahepatic
chol_msk_2018	P-0012423-T01-IM5	1	no alteration	H2019R	no alteration	N/A	no alteration	no alteration	no alteration	N/A	no alteration	N/A	no alteration	no alteration	FGFR2-NOL4 fusion	no alteration	no alteration	no alteration	no alteration	N/A	37.874	DECEASED	41	N/A	N/A	Intrahepatic
chol_msk_2018	P-0012538-T01-IM5	1	no alteration	G197Afs*202 (driver)	no alteration	N/A	no alteration	no alteration	no alteration	N/A	no alteration	N/A	no alteration	no alteration	no alteration	no alteration	no alteration	no alteration	no alteration	N/A	14.203	LIVING	50	N/A	N/A	Intrahepatic
chol_msk_2018	P-0012553-T01-IM5	1	no alteration	no alteration	no alteration	N/A	no alteration	no alteration	no alteration	N/A	no alteration	N/A	no alteration	no alteration	no alteration	no alteration	no alteration	no alteration	G13R (driver)	N/A	14.268	DECEASED	70	N/A	N/A	Intrahepatic
chol_msk_2018	P-0012573-T01-IM5	1	D281H (driver)	D1850Gfs*4 (driver)	no alteration	N/A	no alteration	no alteration	no alteration	N/A	no alteration	N/A	no alteration	no alteration	no alteration	no alteration	no alteration	no alteration	no alteration	N/A	56.12	DECEASED	78	N/A	N/A	Extrahepatic
chol_nccs_2013	715	0	no alteration	no alteration	no alteration	no alteration	no alteration	no alteration	no alteration	no alteration	no alteration	no alteration	no alteration	no alteration	no alteration	no alteration	no alteration	no alteration	no alteration	no alteration	N/A	N/A	64	N/A	N/A	Extrahepatic
chol_nccs_2013	824	0	no alteration	no alteration	no alteration	no alteration	no alteration	no alteration	no alteration	no alteration	no alteration	no alteration	no alteration	no alteration	no alteration	no alteration	no alteration	no alteration	no alteration	no alteration	N/A	N/A	68	N/A	N/A	Intrahepatic
chol_nccs_2013	930	1	no alteration	no alteration	G12V (driver)	no alteration	no alteration	no alteration	no alteration	no alteration	no alteration	no alteration	no alteration	no alteration	no alteration	no alteration	no alteration	no alteration	no alteration	no alteration	N/A	N/A	70	N/A	N/A	Intrahepatic
chol_nccs_2013	1202	1	V272L (driver)	no alteration	G12D (driver)	no alteration	no alteration	no alteration	no alteration	no alteration	no alteration	no alteration	no alteration	no alteration	no alteration	no alteration	no alteration	no alteration	no alteration	no alteration	N/A	N/A	49	N/A	N/A	Intrahepatic
chol_nccs_2013	3001	1	no alteration	G931* (driver)	no alteration	no alteration	no alteration	no alteration	no alteration	no alteration	no alteration	no alteration	no alteration	no alteration	no alteration	no alteration	no alteration	no alteration	no alteration	no alteration	N/A	N/A	69	N/A	N/A	Intrahepatic
chol_nccs_2013	990196	1	P27Lfs*17 (driver)	Q520Sfs*99 (driver)	G12D (driver)	no alteration	no alteration	no alteration	no alteration	no alteration	no alteration	no alteration	no alteration	no alteration	no alteration	no alteration	no alteration	no alteration	no alteration	no alteration	N/A	N/A	77	N/A	N/A	Intrahepatic
chol_nccs_2013	2000123	1	R158H (driver)	no alteration	no alteration	no alteration	no alteration	no alteration	no alteration	no alteration	no alteration	no alteration	no alteration	no alteration	no alteration	no alteration	no alteration	no alteration	no alteration	no alteration	N/A	N/A	73	N/A	N/A	Intrahepatic
chol_nccs_2013	2000861	0	no alteration	no alteration	no alteration	no alteration	no alteration	no alteration	no alteration	no alteration	no alteration	no alteration	no alteration	no alteration	no alteration	no alteration	no alteration	no alteration	no alteration	no alteration	N/A	N/A	69	N/A	N/A	Intrahepatic
chol_nccs_2013	17231203	0	no alteration	no alteration	no alteration	no alteration	no alteration	no alteration	no alteration	no alteration	no alteration	no alteration	no alteration	no alteration	no alteration	no alteration	no alteration	no alteration	no alteration	no alteration	N/A	N/A	61	N/A	N/A	Intrahepatic
chol_nccs_2013	21914187	0	no alteration	no alteration	no alteration	no alteration	no alteration	no alteration	no alteration	no alteration	no alteration	no alteration	no alteration	no alteration	no alteration	no alteration	no alteration	no alteration	no alteration	no alteration	N/A	N/A	67	N/A	N/A	Intrahepatic
chol_nccs_2013	23474504	1	no alteration	W1073* (driver)	no alteration	no alteration	no alteration	no alteration	no alteration	no alteration	no alteration	no alteration	no alteration	no alteration	no alteration	no alteration	no alteration	no alteration	no alteration	no alteration	N/A	N/A	51	N/A	N/A	Extrahepatic
chol_nccs_2013	29150572	0	no alteration	no alteration	no alteration	no alteration	no alteration	no alteration	no alteration	no alteration	no alteration	no alteration	no alteration	no alteration	no alteration	no alteration	no alteration	no alteration	no alteration	no alteration	N/A	N/A	61	N/A	N/A	Extrahepatic
chol_nccs_2013	33587479	1	no alteration	X911_splice (driver)	no alteration	no alteration	no alteration	no alteration	no alteration	no alteration	no alteration	no alteration	no alteration	no alteration	no alteration	no alteration	no alteration	no alteration	no alteration	no alteration	N/A	N/A	51	N/A	N/A	Extrahepatic
chol_nccs_2013	72600277	0	no alteration	no alteration	no alteration	no alteration	no alteration	no alteration	no alteration	no alteration	no alteration	no alteration	no alteration	no alteration	no alteration	no alteration	no alteration	no alteration	no alteration	no alteration	N/A	N/A	55	N/A	N/A	Extrahepatic
chol_nccs_2013	77071507	0	no alteration	no alteration	no alteration	no alteration	no alteration	no alteration	no alteration	no alteration	no alteration	no alteration	no alteration	no alteration	no alteration	no alteration	no alteration	no alteration	no alteration	no alteration	N/A	N/A	49	N/A	N/A	Intrahepatic
chol_nus_2012	B085	1	no alteration	no alteration	A11G (driver)	no alteration	no alteration	no alteration	no alteration	no alteration	no alteration	no alteration	no alteration	no alteration	no alteration	no alteration	no alteration	no alteration	no alteration	no alteration	82	DECEASED	73	N/A	III	N/A
chol_nus_2012	B099	0	no alteration	no alteration	no alteration	no alteration	no alteration	no alteration	no alteration	no alteration	no alteration	no alteration	no alteration	no alteration	no alteration	no alteration	no alteration	no alteration	no alteration	no alteration	12.3	LIVING	48	N/A	III	N/A
chol_nus_2012	R104	1	no alteration	no alteration	G13D (driver)	R327*	no alteration	no alteration	no alteration	no alteration	no alteration	no alteration	no alteration	no alteration	no alteration	no alteration	Y155C (driver)	no alteration	no alteration	no alteration	3.8	DECEASED	64	N/A	III	N/A
chol_nus_2012	T026	1	V73Rfs*76 (driver)	Q878* (driver)	no alteration	no alteration	no alteration	no alteration	no alteration	no alteration	no alteration	no alteration	no alteration	no alteration	no alteration	no alteration	no alteration	no alteration	no alteration	no alteration	10.1	DECEASED	52	N/A	IIIB	N/A
chol_nus_2012	U044	1	Q104* (driver)	no alteration	no alteration	no alteration	no alteration	no alteration	no alteration	H97N	no alteration	no alteration	no alteration	no alteration	no alteration	no alteration	no alteration	no alteration	no alteration	no alteration	1.5	DECEASED	57	N/A	IIIB	N/A
chol_nus_2012	W012	1	R248W (driver)	no alteration	G13=	no alteration	no alteration	no alteration	no alteration	no alteration	no alteration	no alteration	no alteration	no alteration	no alteration	no alteration	no alteration	no alteration	no alteration	no alteration	4.9	DECEASED	61	N/A	III	N/A
chol_nus_2012	W039	1	no alteration	no alteration	no alteration	no alteration	no alteration	no alteration	no alteration	X699_splice	no alteration	no alteration	no alteration	no alteration	no alteration	no alteration	no alteration	no alteration	no alteration	no alteration	2.1	DECEASED	66	N/A	III	N/A
chol_nus_2012	W040	1	N239Kfs*25 (driver)	no alteration	no alteration	no alteration	no alteration	no alteration	no alteration	no alteration	no alteration	no alteration	no alteration	no alteration	no alteration	no alteration	no alteration	no alteration	no alteration	no alteration	5.2	DECEASED	56	N/A	IVA	N/A
chol_tcga	TCGA-3X-AAV9-01	1	no alteration	no alteration	no alteration	no alteration	no alteration	no alteration	R709* (driver)	no alteration	no alteration	no alteration	no alteration	no alteration	no alteration	no alteration	no alteration	no alteration	no alteration	no alteration	11.14	DECEASED	72	N/A	I	Intrahepatic
chol_tcga	TCGA-3X-AAVA-01	1	no alteration	no alteration	no alteration	N674I	no alteration	no alteration	no alteration	no alteration	no alteration	no alteration	no alteration	no alteration	no alteration	no alteration	no alteration	no alteration	no alteration	no alteration	14.62	DECEASED	50	N/A	II	Intrahepatic
chol_tcga	TCGA-3X-AAVB-01	1	R248W (driver)	no alteration	G12R (driver)	no alteration	no alteration	no alteration	no alteration	R2239I	no alteration	no alteration	no alteration	no alteration	no alteration	no alteration	no alteration	no alteration	no alteration	no alteration	12.09	LIVING	70	N/A	IVB	Distal
chol_tcga	TCGA-3X-AAVC-01	1	S241F (driver)	no alteration	no alteration	no alteration	no alteration	no alteration	no alteration	no alteration	no alteration	no alteration	no alteration	no alteration	no alteration	no alteration	no alteration	no alteration	no alteration	no alteration	12.19	LIVING	72	N/A	I	Perihilar
chol_tcga	TCGA-3X-AAVE-01	1	no alteration	HOMDEL (driver)	no alteration	HOMDEL	no alteration	no alteration	no alteration	no alteration	no alteration	no alteration	no alteration	no alteration	no alteration	no alteration	no alteration	no alteration	no alteration	no alteration	6.67	LIVING	60	N/A	II	Intrahepatic
chol_tcga	TCGA-4G-AAZF-01	0	N/A	N/A	N/A	N/A	N/A	N/A	N/A	N/A	N/A	N/A	N/A	N/A	N/A	N/A	N/A	N/A	N/A	N/A	58.38	LIVING	74	N/A	III	Intrahepatic
chol_tcga	TCGA-4G-AAZG-01	0	N/A	N/A	N/A	N/A	N/A	N/A	N/A	N/A	N/A	N/A	N/A	N/A	N/A	N/A	N/A	N/A	N/A	N/A	56.37	LIVING	75	N/A	III	Intrahepatic
chol_tcga	TCGA-4G-AAZO-01	1	no alteration	E2250Rfs*28 (driver)	no alteration	no alteration	no alteration	no alteration	no alteration	no alteration	L755P (driver)	no alteration	no alteration	no alteration	no alteration	no alteration	no alteration	no alteration	no alteration	no alteration	20.01	LIVING	71	N/A	II	Intrahepatic
chol_tcga	TCGA-4G-AAZR-01	0	N/A	N/A	N/A	N/A	N/A	N/A	N/A	N/A	N/A	N/A	N/A	N/A	N/A	N/A	N/A	N/A	N/A	N/A	0.92	DECEASED	74	N/A	II	Perihilar
chol_tcga	TCGA-4G-AAZT-01	1	no alteration	X1180_splice (driver)	no alteration	no alteration	no alteration	H1047L (driver)	no alteration	no alteration	no alteration	no alteration	no alteration	no alteration	no alteration	no alteration	no alteration	no alteration	no alteration	no alteration	6.77	LIVING	62	N/A	I	Intrahepatic
chol_tcga	TCGA-5A-A8ZF-01	0	N/A	N/A	N/A	N/A	N/A	N/A	N/A	N/A	N/A	N/A	N/A	N/A	N/A	N/A	N/A	N/A	N/A	N/A	N/A	N/A	N/A	N/A	N/A	N/A
chol_tcga	TCGA-5A-A8ZG-01	0	N/A	N/A	N/A	N/A	N/A	N/A	N/A	N/A	N/A	N/A	N/A	N/A	N/A	N/A	N/A	N/A	N/A	N/A	N/A	N/A	N/A	N/A	N/A	N/A
chol_tcga	TCGA-W5-AA2G-01	1	no alteration	no alteration	no alteration	K468*	no alteration	no alteration	no alteration	no alteration	no alteration	no alteration	no alteration	no alteration	no alteration	no alteration	no alteration	no alteration	no alteration	no alteration	64.91	LIVING	62	N/A	I	Intrahepatic
chol_tcga	TCGA-W5-AA2H-01	0	no alteration	no alteration	no alteration	no alteration	no alteration	no alteration	no alteration	no alteration	no alteration	no alteration	no alteration	no alteration	no alteration	no alteration	no alteration	no alteration	no alteration	no alteration	20.86	LIVING	70	N/A	III	Distal
chol_tcga	TCGA-W5-AA2I-01	1	C141R (driver)	no alteration	no alteration	D943V	AMP	no alteration	no alteration	no alteration	no alteration	no alteration	no alteration	no alteration	no alteration	no alteration	no alteration	no alteration	no alteration	no alteration	63.7	DECEASED	66	N/A	I	Intrahepatic
chol_tcga	TCGA-W5-AA2J-01	0	N/A	N/A	N/A	N/A	N/A	N/A	N/A	N/A	N/A	N/A	N/A	N/A	N/A	N/A	N/A	N/A	N/A	N/A	30.09	LIVING	66	N/A	IVA	Perihilar
chol_tcga	TCGA-W5-AA2K-01	0	N/A	N/A	N/A	N/A	N/A	N/A	N/A	N/A	N/A	N/A	N/A	N/A	N/A	N/A	N/A	N/A	N/A	N/A	27.37	DECEASED	75	N/A	I	Intrahepatic
chol_tcga	TCGA-W5-AA2M-01	0	N/A	N/A	N/A	N/A	N/A	N/A	N/A	N/A	N/A	N/A	N/A	N/A	N/A	N/A	N/A	N/A	N/A	N/A	17.74	DECEASED	49	N/A	IVB	Perihilar
chol_tcga	TCGA-W5-AA2O-01	1	Y234* (driver), M237Gfs*20 (driver)	no alteration	no alteration	no alteration	no alteration	no alteration	no alteration	no alteration	no alteration	no alteration	no alteration	P1158H	no alteration	no alteration	AMP	no alteration	no alteration	no alteration	21.02	DECEASED	57	N/A	I	Intrahepatic
chol_tcga	TCGA-W5-AA2Q-01	1	no alteration	no alteration	no alteration	no alteration	no alteration	no alteration	no alteration	no alteration	no alteration	no alteration	no alteration	no alteration	no alteration	no alteration	no alteration	R1051Q	no alteration	AMP	1.64	LIVING	68	N/A	II	Intrahepatic
chol_tcga	TCGA-W5-AA2R-01	0	no alteration	no alteration	no alteration	no alteration	no alteration	no alteration	no alteration	no alteration	no alteration	no alteration	no alteration	no alteration	no alteration	no alteration	no alteration	no alteration	no alteration	no alteration	48.78	LIVING	77	N/A	I	Intrahepatic
chol_tcga	TCGA-W5-AA2T-01	0	no alteration	no alteration	no alteration	no alteration	no alteration	no alteration	no alteration	no alteration	no alteration	no alteration	no alteration	no alteration	no alteration	no alteration	no alteration	no alteration	no alteration	no alteration	40.08	DECEASED	64	N/A	II	Intrahepatic
chol_tcga	TCGA-W5-AA2U-01	1	no alteration	no alteration	no alteration	no alteration	no alteration	no alteration	no alteration	no alteration	no alteration	no alteration	no alteration	S602C	no alteration	no alteration	no alteration	no alteration	no alteration	no alteration	20.6	DECEASED	78	N/A	I	Intrahepatic
chol_tcga	TCGA-W5-AA2W-01	0	no alteration	no alteration	no alteration	no alteration	no alteration	no alteration	no alteration	no alteration	no alteration	no alteration	no alteration	no alteration	no alteration	no alteration	no alteration	no alteration	no alteration	no alteration	30.35	DECEASED	31	N/A	IVA	Intrahepatic
chol_tcga	TCGA-W5-AA2X-01	1	no alteration	no alteration	no alteration	HOMDEL	K62Sfs*100 (driver)	no alteration	no alteration	no alteration	no alteration	no alteration	no alteration	no alteration	no alteration	no alteration	no alteration	no alteration	HOMDEL	no alteration	8.9	DECEASED	67	N/A	IVB	Perihilar
chol_tcga	TCGA-W5-AA2Z-01	0	no alteration	no alteration	no alteration	no alteration	no alteration	no alteration	no alteration	no alteration	no alteration	no alteration	no alteration	no alteration	no alteration	no alteration	no alteration	no alteration	no alteration	no alteration	5.09	LIVING	29	N/A	II	Intrahepatic
chol_tcga	TCGA-W5-AA30-01	1	no alteration	no alteration	no alteration	no alteration	no alteration	no alteration	no alteration	no alteration	no alteration	no alteration	no alteration	no alteration	no alteration	no alteration	no alteration	no alteration	no alteration	AMP	35.45	LIVING	82	N/A	I	Intrahepatic
chol_tcga	TCGA-W5-AA31-01	1	HOMDEL (driver)	no alteration	no alteration	no alteration	no alteration	no alteration	no alteration	no alteration	no alteration	no alteration	no alteration	no alteration	no alteration	no alteration	no alteration	no alteration	no alteration	no alteration	0.33	LIVING	71	N/A	I	Intrahepatic
chol_tcga	TCGA-W5-AA33-01	0	no alteration	no alteration	no alteration	no alteration	no alteration	no alteration	no alteration	no alteration	no alteration	no alteration	no alteration	no alteration	no alteration	no alteration	no alteration	no alteration	no alteration	no alteration	35.15	LIVING	60	N/A	I	Intrahepatic
chol_tcga	TCGA-W5-AA34-01	1	no alteration	no alteration	no alteration	no alteration	no alteration	no alteration	no alteration	no alteration	no alteration	no alteration	no alteration	no alteration	F276C (driver)	no alteration	no alteration	no alteration	no alteration	no alteration	N/A	DECEASED	75	N/A	I	Intrahepatic
chol_tcga	TCGA-W5-AA36-01	0	no alteration	no alteration	no alteration	no alteration	no alteration	no alteration	no alteration	no alteration	no alteration	no alteration	no alteration	no alteration	no alteration	no alteration	no alteration	no alteration	no alteration	no alteration	46.06	DECEASED	51	N/A	IV	Perihilar
chol_tcga	TCGA-W5-AA38-01	0	no alteration	no alteration	no alteration	no alteration	no alteration	no alteration	no alteration	no alteration	no alteration	no alteration	no alteration	no alteration	no alteration	no alteration	no alteration	no alteration	no alteration	no alteration	31.67	LIVING	55	N/A	I	Intrahepatic
chol_tcga	TCGA-W5-AA39-01	1	no alteration	no alteration	no alteration	no alteration	no alteration	no alteration	no alteration	no alteration	L994V	no alteration	no alteration	no alteration	no alteration	G27C, L149P	L320* (driver), L320V (driver)	no alteration	no alteration	no alteration	5.58	DECEASED	81	N/A	II	Intrahepatic
chol_tcga	TCGA-W6-AA0S-01	1	no alteration	no alteration	AMP (driver)	no alteration	no alteration	AMP (driver)	no alteration	no alteration	no alteration	no alteration	no alteration	no alteration	no alteration	no alteration	no alteration	no alteration	no alteration	no alteration	11.56	LIVING	46	N/A	I	Intrahepatic
chol_tcga	TCGA-W6-AA0T-01	0	N/A	N/A	N/A	N/A	N/A	N/A	N/A	N/A	N/A	N/A	N/A	N/A	N/A	N/A	N/A	N/A	N/A	N/A	21.55	LIVING	62	N/A	III	Intrahepatic
chol_tcga	TCGA-W7-A93N-01	0	N/A	N/A	N/A	N/A	N/A	N/A	N/A	N/A	N/A	N/A	N/A	N/A	N/A	N/A	N/A	N/A	N/A	N/A	N/A	N/A	N/A	N/A	N/A	N/A
chol_tcga	TCGA-W7-A93O-01	0	N/A	N/A	N/A	N/A	N/A	N/A	N/A	N/A	N/A	N/A	N/A	N/A	N/A	N/A	N/A	N/A	N/A	N/A	N/A	N/A	N/A	N/A	N/A	N/A
chol_tcga	TCGA-W7-A93P-01	0	N/A	N/A	N/A	N/A	N/A	N/A	N/A	N/A	N/A	N/A	N/A	N/A	N/A	N/A	N/A	N/A	N/A	N/A	N/A	N/A	N/A	N/A	N/A	N/A
chol_tcga	TCGA-WD-A7RX-01	1	no alteration	S1558Cfs*11 (driver), Q1363K	no alteration	no alteration	no alteration	no alteration	no alteration	no alteration	no alteration	no alteration	no alteration	no alteration	no alteration	no alteration	no alteration	no alteration	no alteration	AMP	0.69	DECEASED	71	N/A	II	Intrahepatic
chol_tcga	TCGA-YR-A95A-01	1	no alteration	N1571* (driver)	no alteration	I145Nfs*5	no alteration	no alteration	no alteration	no alteration	no alteration	no alteration	no alteration	no alteration	no alteration	no alteration	no alteration	no alteration	no alteration	no alteration	0.85	DECEASED	52	N/A	IV	Perihilar
chol_tcga	TCGA-ZD-A8I3-01	1	no alteration	G1556Pfs*12 (driver)	no alteration	no alteration	no alteration	no alteration	no alteration	no alteration	no alteration	D1573H	no alteration	no alteration	no alteration	no alteration	no alteration	L1192I	no alteration	no alteration	N/A	DECEASED	73	N/A	II	Intrahepatic
chol_tcga	TCGA-ZH-A8Y1-01	1	no alteration	no alteration	no alteration	no alteration	no alteration	E545K (driver)	no alteration	no alteration	no alteration	no alteration	no alteration	no alteration	no alteration	no alteration	no alteration	no alteration	no alteration	no alteration	12.65	DECEASED	74	N/A	IVA	Intrahepatic
chol_tcga	TCGA-ZH-A8Y2-01	0	no alteration	no alteration	no alteration	no alteration	no alteration	no alteration	no alteration	no alteration	no alteration	no alteration	no alteration	no alteration	no alteration	no alteration	no alteration	no alteration	no alteration	no alteration	23.03	DECEASED	59	N/A	I	Intrahepatic
chol_tcga	TCGA-ZH-A8Y3-01	0	N/A	N/A	N/A	N/A	N/A	N/A	N/A	N/A	N/A	N/A	N/A	N/A	N/A	N/A	N/A	N/A	N/A	N/A	18.43	DECEASED	61	N/A	II	Intrahepatic
chol_tcga	TCGA-ZH-A8Y4-01	0	no alteration	no alteration	no alteration	no alteration	no alteration	no alteration	no alteration	no alteration	no alteration	no alteration	no alteration	no alteration	no alteration	no alteration	no alteration	no alteration	no alteration	no alteration	24.34	DECEASED	58	N/A	I	Intrahepatic
chol_tcga	TCGA-ZH-A8Y5-01	1	C124Y (driver)	no alteration	no alteration	no alteration	no alteration	no alteration	no alteration	no alteration	no alteration	no alteration	no alteration	no alteration	no alteration	no alteration	AMP	no alteration	no alteration	AMP	23.23	LIVING	69	N/A	IVB	Intrahepatic
chol_tcga	TCGA-ZH-A8Y6-01	1	no alteration	no alteration	no alteration	no alteration	no alteration	no alteration	no alteration	no alteration	no alteration	A545V	no alteration	no alteration	no alteration	no alteration	no alteration	no alteration	no alteration	no alteration	3.78	LIVING	41	N/A	I	Intrahepatic
chol_tcga	TCGA-ZH-A8Y7-01	0	N/A	N/A	N/A	N/A	N/A	N/A	N/A	N/A	N/A	N/A	N/A	N/A	N/A	N/A	N/A	N/A	N/A	N/A	24.8	LIVING	59	N/A	IVB	Intrahepatic
chol_tcga	TCGA-ZH-A8Y8-01	1	no alteration	no alteration	Q61K (driver)	no alteration	no alteration	no alteration	no alteration	no alteration	no alteration	no alteration	no alteration	L432M	no alteration	no alteration	no alteration	no alteration	no alteration	no alteration	3.42	LIVING	73	N/A	I	Intrahepatic
chol_tcga	TCGA-ZK-AAYZ-01	0	N/A	N/A	N/A	N/A	N/A	N/A	N/A	N/A	N/A	N/A	N/A	N/A	N/A	N/A	N/A	N/A	N/A	N/A	N/A	N/A	N/A	N/A	N/A	N/A
chol_tcga	TCGA-ZU-A8S4-01	1	no alteration	no alteration	no alteration	no alteration	no alteration	no alteration	no alteration	no alteration	no alteration	no alteration	V600E (driver)	no alteration	no alteration	no alteration	no alteration	no alteration	no alteration	no alteration	3.22	DECEASED	52	N/A	I	Intrahepatic
