# Supplementary material for: Therapeutic targeting of ARID1A and PI3K/AKT pathway alterations in cholangiocarcinoma
Source: PeerJ. 2022 Jan 13;10:e12750. doi: 10.7717/peerj.12750 (PMC8761367; doi:10.7717/peerj.12750)
Supplement: Supplemental Information 4 [file peerj-10-12750-s004.xlsx]

## Sheet: Supplemental Table S2
Supplemental Table S2: The co-occurrence and mutual exclusivity of gene mutations
A	B	Neither	A Not B	B Not A	Both	Log2 Odds Ratio	p-Value	q-Value	Tendency
ARID1A	EPHA2	394	75	24	22	2.268	<0.001	<0.001	Co-occurrence
LAMA2	PIK3R1	486	17	7	5	>3	<0.001	0.004	Co-occurrence
RASA1	TNN	484	16	10	5	>3	<0.001	0.008	Co-occurrence
PIK3CA	KDR	660	36	9	5	>3	<0.001	0.021	Co-occurrence
RASA1	LAMA1	479	16	15	5	>3	<0.001	0.021	Co-occurrence
LAMA2	LAMA1	478	17	15	5	>3	<0.001	0.021	Co-occurrence
LAMA1	KDR	486	16	9	4	>3	<0.001	0.021	Co-occurrence
ARID1A	LAMA1	408	87	10	10	2.229	0.001	0.024	Co-occurrence
TP53	KRAS	431	168	64	47	0.914	0.002	0.036	Co-occurrence
TP53	FGFR2	460	211	35	4	-2.005	0.002	0.036	Mutual exclusivity
ERBB4	PIK3R1	683	15	9	3	>3	0.003	0.036	Co-occurrence
LAMA2	ERBB4	481	18	12	4	>3	0.003	0.042	Co-occurrence
LAMA1	PTEN	481	16	14	4	>3	0.004	0.042	Co-occurrence
TP53	PTEN	486	202	9	13	1.797	0.004	0.043	Co-occurrence
ERBB4	KDR	681	15	11	3	>3	0.004	0.043	Co-occurrence
PIK3R1	PTEN	679	9	19	3	>3	0.005	0.043	Co-occurrence
KDR	TNN	490	10	12	3	>3	0.005	0.043	Co-occurrence
STK11	TNN	477	23	11	4	2.915	0.006	0.047	Co-occurrence
ARID1A	PIK3CA	547	122	26	15	1.371	0.006	0.047	Co-occurrence
EPHA2	PIK3CA	449	39	20	7	2.011	0.006	0.049	Co-occurrence
RASA1	ERBB4	663	29	14	4	2.708	0.007	0.053	Co-occurrence
TP53	LAMA2	338	155	9	13	1.655	0.008	0.053	Co-occurrence
ARID1A	KDR	566	130	7	7	2.122	0.009	0.053	Co-occurrence
LAMA1	PIK3R1	486	17	9	3	>3	0.009	0.053	Co-occurrence
ERBB4	TNN	487	13	12	3	>3	0.009	0.053	Co-occurrence
RASA1	LAMA2	476	17	18	4	2.637	0.009	0.053	Co-occurrence
KRAS	FGFR2	561	110	38	1	-2.897	0.009	0.053	Mutual exclusivity
PTEN	TNN	485	15	12	3	>3	0.013	0.069	Co-occurrence
KRAS	KDR	591	105	8	6	2.078	0.013	0.07	Co-occurrence
RASA1	PIK3R1	668	30	9	3	2.892	0.015	0.077	Co-occurrence
ERBB4	PTEN	673	15	19	3	2.825	0.016	0.077	Co-occurrence
LAMA1	BRAF	483	17	12	3	2.828	0.017	0.079	Co-occurrence
LAMA1	TNN	483	17	12	3	2.828	0.017	0.079	Co-occurrence
TP53	RASA1	478	199	17	16	1.177	0.019	0.085	Co-occurrence
LAMA1	ERBB4	482	17	13	3	2.71	0.02	0.089	Co-occurrence
PIK3R1	KDR	686	10	12	2	>3	0.021	0.089	Co-occurrence
EPHA2	KDR	460	42	9	4	2.283	0.022	0.089	Co-occurrence
LAMA2	TNN	481	19	12	3	2.662	0.022	0.089	Co-occurrence
KRAS	NRAS	579	111	20	0	<-3	0.032	0.124	Mutual exclusivity
PIK3CA	RASA1	641	36	28	5	1.669	0.036	0.136	Co-occurrence
LAMA2	PTEN	478	19	15	3	2.331	0.036	0.136	Co-occurrence
BRAF	PTEN	666	22	19	3	2.257	0.038	0.139	Co-occurrence
ARID1A	ERBB4	562	130	11	7	1.46	0.041	0.146	Co-occurrence
PIK3R1	TNN	490	10	13	2	2.914	0.044	0.152	Co-occurrence
ARID1A	TNN	409	91	9	6	1.583	0.045	0.152	Co-occurrence
TP53	ERBB4	486	206	9	9	1.238	0.06	0.201	Co-occurrence
ARID1A	PIK3R1	566	132	7	5	1.615	0.062	0.202	Co-occurrence
PTEN	KDR	676	20	12	2	2.494	0.067	0.209	Co-occurrence
BRAF	TNN	487	13	13	2	2.527	0.067	0.209	Co-occurrence
PIK3CA	ERBB2	645	37	24	4	1.539	0.071	0.218	Co-occurrence
TP53	LAMA1	337	158	10	10	1.093	0.077	0.224	Co-occurrence
ERBB2	PIK3R1	672	26	10	2	2.37	0.078	0.224	Co-occurrence
PIK3CA	ERBB4	654	38	15	3	1.783	0.08	0.224	Co-occurrence
STK11	LAMA1	471	24	17	3	1.792	0.081	0.224	Co-occurrence
PIK3CA	LAMA1	471	24	17	3	1.792	0.081	0.224	Co-occurrence
FGFR2	TNN	485	15	13	2	2.315	0.084	0.229	Co-occurrence
EPHA2	LAMA1	453	42	16	4	1.431	0.093	0.25	Co-occurrence
TP53	KDR	488	208	7	7	1.23	0.095	0.251	Co-occurrence
TP53	NRAS	478	212	17	3	-1.33	0.099	0.252	Mutual exclusivity
EPHA2	NRAS	459	43	10	3	1.679	0.101	0.252	Co-occurrence
PIK3CA	LAMA2	469	24	19	3	1.626	0.102	0.252	Co-occurrence
LAMA2	KDR	482	20	11	2	2.132	0.102	0.252	Co-occurrence
RASA1	BRAF	655	30	22	3	1.574	0.105	0.254	Co-occurrence
EPHA2	RASA1	452	42	17	4	1.34	0.108	0.258	Co-occurrence
PIK3CA	PTEN	650	38	19	3	1.433	0.128	0.299	Co-occurrence
BRAF	ERBB4	669	23	16	2	1.862	0.129	0.299	Co-occurrence
RASA1	KDR	665	31	12	2	1.838	0.135	0.307	Co-occurrence
FGFR2	PIK3R1	661	37	10	2	1.837	0.137	0.308	Co-occurrence
EPHA2	BRAF	457	43	12	3	1.41	0.142	0.315	Co-occurrence
PIK3CA	PIK3R1	659	39	10	2	1.757	0.149	0.325	Co-occurrence
ARID1A	ERBB2	553	129	20	8	0.778	0.152	0.329	Co-occurrence
KRAS	ERBB2	573	109	26	2	-1.306	0.159	0.337	Mutual exclusivity
LAMA2	FGFR2	478	20	15	2	1.672	0.161	0.337	Co-occurrence
EPHA2	ERBB4	456	43	13	3	1.291	0.164	0.339	Co-occurrence
ARID1A	RASA1	549	128	24	9	0.686	0.166	0.339	Co-occurrence
PIK3CA	BRAF	647	38	22	3	1.215	0.17	0.343	Co-occurrence
PIK3CA	FGFR2	634	37	35	4	0.97	0.182	0.358	Co-occurrence
PIK3CA	TNN	475	25	13	2	1.547	0.183	0.358	Co-occurrence
STK11	RASA1	647	30	30	3	1.109	0.194	0.375	Co-occurrence
TP53	ERBB2	478	204	17	11	0.6	0.196	0.375	Co-occurrence
STK11	ERBB4	661	31	16	2	1.414	0.202	0.378	Co-occurrence
KRAS	PIK3CA	562	107	37	4	-0.816	0.202	0.378	Mutual exclusivity
EPHA2	PTEN	454	43	15	3	1.078	0.211	0.388	Co-occurrence
KRAS	RASA1	569	108	30	3	-0.925	0.213	0.388	Mutual exclusivity
KRAS	BRAF	576	109	23	2	-1.122	0.222	0.4	Mutual exclusivity
ARID1A	NRAS	555	135	18	2	-1.13	0.225	0.4	Mutual exclusivity
EPHA2	ERBB2	453	43	16	3	0.982	0.236	0.415	Co-occurrence
STK11	ERBB2	649	33	28	0	<-3	0.257	0.441	Mutual exclusivity
RASA1	ERBB2	649	33	28	0	<-3	0.257	0.441	Mutual exclusivity
ERBB4	FGFR2	655	16	37	2	1.146	0.26	0.441	Co-occurrence
RASA1	FGFR2	641	30	36	3	0.832	0.27	0.448	Co-occurrence
STK11	PTEN	657	31	20	2	1.084	0.272	0.448	Co-occurrence
RASA1	PTEN	657	31	20	2	1.084	0.272	0.448	Co-occurrence
KRAS	LAMA2	412	81	17	5	0.581	0.299	0.486	Co-occurrence
KRAS	ERBB4	585	107	14	4	0.643	0.306	0.493	Co-occurrence
ARID1A	KRAS	481	118	92	19	-0.248	0.313	0.498	Mutual exclusivity
FGFR2	NRAS	651	39	20	0	<-3	0.318	0.498	Mutual exclusivity
EPHA2	PIK3R1	457	46	12	0	<-3	0.321	0.498	Mutual exclusivity
KRAS	EPHA2	389	80	40	6	-0.455	0.323	0.498	Mutual exclusivity
STK11	BRAF	654	31	23	2	0.875	0.326	0.498	Co-occurrence
ARID1A	FGFR2	540	131	33	6	-0.416	0.346	0.522	Mutual exclusivity
ARID1A	BRAF	554	131	19	6	0.417	0.348	0.522	Co-occurrence
BRAF	PIK3R1	674	24	11	1	1.352	0.352	0.523	Co-occurrence
TP53	TNN	338	162	9	6	0.476	0.358	0.526	Co-occurrence
ARID1A	STK11	545	132	28	5	-0.44	0.362	0.527	Mutual exclusivity
ARID1A	LAMA2	399	94	19	3	-0.577	0.379	0.545	Mutual exclusivity
RASA1	NRAS	657	33	20	0	<-3	0.381	0.545	Mutual exclusivity
BRAF	KDR	672	24	13	1	1.107	0.397	0.563	Co-occurrence
BRAF	FGFR2	648	23	37	2	0.607	0.405	0.568	Co-occurrence
TP53	ARID1A	401	172	94	43	0.093	0.414	0.571	Co-occurrence
KRAS	STK11	572	105	27	6	0.276	0.414	0.571	Co-occurrence
ERBB2	KDR	669	27	13	1	0.931	0.434	0.583	Co-occurrence
STK11	PIK3R1	666	32	11	1	0.92	0.438	0.583	Co-occurrence
TP53	EPHA2	315	154	32	14	-0.16	0.44	0.583	Mutual exclusivity
EPHA2	STK11	445	43	24	3	0.371	0.441	0.583	Co-occurrence
ERBB2	NRAS	662	28	20	0	<-3	0.442	0.583	Mutual exclusivity
STK11	FGFR2	639	32	38	1	-0.928	0.447	0.584	Mutual exclusivity
EPHA2	FGFR2	454	44	15	2	0.46	0.459	0.595	Co-occurrence
ERBB2	ERBB4	664	28	18	0	<-3	0.48	0.618	Mutual exclusivity
LAMA2	BRAF	479	21	14	1	0.704	0.485	0.619	Co-occurrence
STK11	KDR	664	32	13	1	0.675	0.49	0.619	Co-occurrence
LAMA1	FGFR2	479	19	16	1	0.656	0.496	0.62	Co-occurrence
TP53	BRAF	477	208	18	7	-0.165	0.499	0.62	Mutual exclusivity
BRAF	NRAS	666	24	19	1	0.546	0.517	0.631	Co-occurrence
TP53	PIK3R1	487	211	8	4	0.207	0.517	0.631	Co-occurrence
TP53	PIK3CA	466	203	29	12	-0.074	0.52	0.631	Mutual exclusivity
PTEN	NRAS	668	22	20	0	<-3	0.528	0.632	Mutual exclusivity
KRAS	TNN	416	84	13	2	-0.392	0.529	0.632	Mutual exclusivity
ERBB2	LAMA1	477	18	19	1	0.48	0.535	0.632	Co-occurrence
ERBB2	FGFR2	644	27	38	1	-0.672	0.537	0.632	Mutual exclusivity
KRAS	PTEN	580	108	19	3	-0.238	0.541	0.632	Mutual exclusivity
FGFR2	KDR	658	38	13	1	0.414	0.55	0.636	Co-occurrence
LAMA2	NRAS	480	22	13	0	<-3	0.563	0.636	Mutual exclusivity
KRAS	LAMA1	412	83	17	3	-0.191	0.564	0.636	Mutual exclusivity
ERBB2	TNN	481	19	15	0	<-3	0.564	0.636	Mutual exclusivity
TP53	STK11	472	205	23	10	0.002	0.567	0.636	Co-occurrence
LAMA2	ERBB2	475	21	18	1	0.33	0.57	0.636	Co-occurrence
ARID1A	PTEN	555	133	18	4	-0.109	0.576	0.636	Mutual exclusivity
STK11	PIK3CA	638	31	39	2	0.078	0.581	0.636	Co-occurrence
KRAS	PIK3R1	589	109	10	2	0.112	0.583	0.636	Co-occurrence
ERBB2	PTEN	661	27	21	1	0.221	0.593	0.636	Co-occurrence
LAMA1	NRAS	482	20	13	0	<-3	0.594	0.636	Mutual exclusivity
ERBB4	NRAS	672	18	20	0	<-3	0.594	0.636	Mutual exclusivity
EPHA2	LAMA2	449	44	20	2	0.029	0.602	0.639	Co-occurrence
EPHA2	TNN	455	45	14	1	-0.469	0.606	0.639	Mutual exclusivity
STK11	NRAS	658	32	19	1	0.114	0.619	0.649	Co-occurrence
ERBB2	BRAF	658	27	24	1	0.022	0.641	0.667	Co-occurrence
FGFR2	PTEN	650	38	21	1	-0.296	0.657	0.679	Mutual exclusivity
KDR	NRAS	676	14	20	0	<-3	0.668	0.682	Mutual exclusivity
PIK3CA	NRAS	650	40	19	1	-0.226	0.677	0.682	Mutual exclusivity
STK11	LAMA2	467	26	21	1	-0.225	0.677	0.682	Mutual exclusivity
NRAS	TNN	487	13	15	0	<-3	0.678	0.682	Mutual exclusivity
PIK3R1	NRAS	678	12	20	0	<-3	0.708	0.708	Mutual exclusivity
