# Supplementary material for: Therapeutic targeting of ARID1A and PI3K/AKT pathway alterations in cholangiocarcinoma
Source: PeerJ. 2022 Jan 13;10:e12750. doi: 10.7717/peerj.12750 (PMC8761367; doi:10.7717/peerj.12750)
Supplement: Supplemental Information 5 [file peerj-10-12750-s005.xlsx]

## Sheet: Supplemental Table S3
Supplemental Table S3: IC50 values of MK-2206 in CCA cell lines
CCA cell lines	IC50 of MK-2206, µM
ARID1A-depleted CCA cell lines	24 h	48 h	72h
KKU-452	69 ± 13	44 ± 2	30 ± 5
KKU-055	85 ± 6	35 ± 6	19 ± 4
ARID1A-intact CCA cell lines
KKU-213A	152 ± 17	47 ± 9	26 ± 7
KKU-100	120 ± 9	82 ± 2	47 ± 18
ARID1A-knockdown KKU-213A cell lines	24 h	48 h	72h
Control (Non-target shRNA)	41 ± 8	21 ± 4	15 ± 2
shARID1A#1	24 ± 5	13 ± 1	13 ± 1
shARID1A#2	24 ± 7	16 ± 3	11 ± 1
ARID1A-knockdown HUCCT1 cell lines	24 h	48 h	72h
Control (Non-target shRNA)	33 ± 8	15 ± 4	11 ± 2
shARID1A#1	23 ± 2	9 ± 2	7 ± 2
shARID1A#2	19 ± 2	10 ± 2	8 ± 2
