# Supplementary material for: Therapeutic targeting of ARID1A and PI3K/AKT pathway alterations in cholangiocarcinoma
Source: PeerJ. 2022 Jan 13;10:e12750. doi: 10.7717/peerj.12750 (PMC8761367; doi:10.7717/peerj.12750)
Supplement: Supplemental Information 6 [file peerj-10-12750-s006.xlsx]

## Sheet: Supplemental file 1
%Cell viability (Four CCA Cell lines) MTT assay
N1	KKU-452						KKU-055						KKU-213A						KKU-100
Final Conc. (MK-2206 )	O.D 1	O.D 2	Mean O.D	[Nt/Nc]*100	SD		O.D 1	O.D 2	Mean O.D	[Nt/Nc]*100	SD		O.D 1	O.D 2	Mean O.D	[Nt/Nc]*100	SD		O.D 1	O.D 2	Mean O.D	[Nt/Nc]*100	SD
Control	0.367	0.397	0.382	100	0.0212132		0.298	0.315	0.3065	100	0.0120208		0.303	0.286	0.2945	100	0.0120208		0.295	0.335	0.315	100	0.0282843
2.5 µM	0.343	0.347	0.345	90.3141	0.00282843		0.311	0.312	0.3115	101.631	0.000707107		0.348	0.307	0.3275	111.205	0.0289914		0.335	0.367	0.351	111.429	0.0226274
5 µM	0.326	0.325	0.3255	85.2094	0.000707107		0.298	0.285	0.2915	95.106	0.00919239		0.319	0.351	0.335	113.752	0.0226274		0.352	0.458	0.405	128.571	0.0749533
10 µM	0.276	0.276	0.276	72.2513	0		0.26	0.238	0.249	81.2398	0.0155563		0.291	0.27	0.2805	95.2462	0.0148492		0.303	0.375	0.339	107.619	0.0509117
20 µM	0.327	0.325	0.326	85.3403	0.00141421		0.271	0.277	0.274	89.3964	0.00424264		0.305	0.305	0.305	103.565	0		0.259	0.265	0.262	83.1746	0.00424264
40 µM	0.208	0.21	0.209	54.712	0.00141421		0.201	0.204	0.2025	66.0685	0.00212132		0.216	0.215	0.2155	73.1749	0.000707107		0.207	0.209	0.208	66.0317	0.00141421
50 µM	0.204	0.205	0.2045	53.534	0.000707107		0.203	0.201	0.202	65.9054	0.00141421		0.214	0.215	0.2145	72.8353	0.000707107		0.205	0.206	0.2055	65.2381	0.000707107
N2	KKU-452						KKU-055						KKU-213A						KKU-100
Final Conc. (MK-2206 )	O.D 1	O.D 2	Mean O.D	[Nt/Nc]*100	SD		O.D 1	O.D 2	Mean O.D	[Nt/Nc]*100	SD		O.D 1	O.D 2	Mean O.D	[Nt/Nc]*100	SD		O.D 1	O.D 2	Mean O.D	[Nt/Nc]*100	SD
Control	0.308	0.362	0.335	100	0.0381838		0.323	0.313	0.318	100	0.00707107		0.321	0.312	0.3165	100	0.00636396		0.428	0.427	0.4275	100	0.000707107
2.5 µM	0.33	0.315	0.3225	96.2687	0.0106066		0.296	0.3	0.298	93.7107	0.00282843		0.318	0.329	0.3235	102.212	0.00777817		0.4	0.392	0.396	92.6316	0.00565685
5 µM	0.297	0.291	0.294	87.7612	0.00424264		0.272	0.275	0.2735	86.0063	0.00212132		0.299	0.32	0.3095	97.7883	0.0148492		0.5	0.455	0.4775	111.696	0.0318198
10 µM	0.331	0.368	0.3495	104.328	0.026163		0.31	0.31	0.31	97.4843	0		0.355	0.349	0.352	111.216	0.00424264		0.517	0.5	0.5085	118.947	0.0120208
20 µM	0.283	0.273	0.278	82.9851	0.00707107		0.253	0.264	0.2585	81.2893	0.00777817		0.302	0.277	0.2895	91.4692	0.0176777		0.496	0.506	0.501	117.193	0.00707107
40 µM	0.212	0.219	0.2155	64.3284	0.00494975		0.219	0.205	0.212	66.6667	0.00989949		0.248	0.243	0.2455	77.5671	0.00353553		0.271	0.252	0.2615	61.1696	0.013435
50 µM	0.17	0.182	0.176	52.5373	0.00848528		0.183	0.191	0.187	58.805	0.00565685		0.205	0.208	0.2065	65.2449	0.00212132		0.21	0.219	0.2145	50.1754	0.00636396
N3	KKU-452						KKU-055						KKU-213A						KKU-100
Final Conc. (MK-2206 )	O.D 1	O.D 2	Mean O.D	[Nt/Nc]*100	SD		O.D 1	O.D 2	Mean O.D	[Nt/Nc]*100	SD		O.D 1	O.D 2	Mean O.D	[Nt/Nc]*100	SD		O.D 1	O.D 2	Mean O.D	[Nt/Nc]*100	SD
Control	0.263	0.268	0.2655	100	0.00353553		0.28	0.27	0.275	100	0.00707107		0.309	0.299	0.304	100	0.00707107		0.287	0.28	0.2835	100	0.00494975
2.5 µM	0.218	0.22	0.219	82.4859	0.00141421		0.24	0.249	0.2445	88.9091	0.00636396		0.304	0.31	0.307	100.987	0.00424264		0.256	0.297	0.2765	97.5309	0.0289914
5 µM	0.197	0.206	0.2015	75.8945	0.00636396		0.241	0.239	0.24	87.2727	0.00141421		0.3	0.296	0.298	98.0263	0.00282843		0.253	0.264	0.2585	91.1817	0.00777817
10 µM	0.243	0.246	0.2445	92.0904	0.00212132		0.28	0.28	0.28	101.818	0		0.309	0.31	0.3095	101.809	0.000707107		0.31	0.317	0.3135	110.582	0.00494975
20 µM	0.203	0.202	0.2025	76.2712	0.000707107		0.236	0.223	0.2295	83.4545	0.00919239		0.282	0.288	0.285	93.75	0.00424264		0.268	0.285	0.2765	97.5309	0.0120208
40 µM	0.187	0.189	0.188	70.8098	0.00141421		0.184	0.188	0.186	67.6364	0.00282843		0.23	0.23	0.23	75.6579	0		0.2	0.206	0.203	71.6049	0.00424264
50 µM	0.168	0.167	0.1675	63.0885	0.000707107		0.166	0.159	0.1625	59.0909	0.00494975		0.218	0.21	0.214	70.3947	0.00565685		0.183	0.189	0.186	65.6085	0.00424264
IC50	N
	1	2	3	Mean	SD
KKU-452	53.59	74.92	77.54	68.6833	13.1367
KKU-055	91.17	79.26	84.77	85.0667	5.96054
KKU-213A	170.8	139.7	144.9	151.8	16.6586
KKU-100	114.8	114.4	130.5	119.9	9.18205
%Cell viability (ARID1A knockdown Cell lines)
N1	shN_KKU-213A						shARID1A#1_KKU-213A						shARID1A#2_KKU-213A
Final Conc. (MK-2206 )	O.D 1	O.D 2	Mean O.D	[Nt/Nc]*100	SD		O.D 1	O.D 2	Mean O.D	[Nt/Nc]*100	SD		O.D 1	O.D 2	Mean O.D	[Nt/Nc]*100	SD
Control	0.6	0.618	0.609	100	0.0127279		0.395	0.386	0.3905	100	0.00636396		0.705	0.695	0.7	100	0.00707107
2.5 µM	0.626	0.679	0.6525	107.143	0.0374767		0.34	0.348	0.344	88.0922	0.00565685		0.527	0.55	0.5385	76.9286	0.0162635
5 µM	0.595	0.582	0.5885	96.6338	0.00919239		0.349	0.302	0.3255	83.3547	0.033234		0.487	0.546	0.5165	73.7857	0.0417193
10 µM	0.691	0.616	0.6535	107.307	0.053033		0.311	0.347	0.329	84.251	0.0254558		0.614	0.609	0.6115	87.3571	0.00353553
20 µM	0.363	0.387	0.375	61.5764	0.0169706		0.205	0.222	0.2135	54.6735	0.0120208		0.287	0.264	0.2755	39.3571	0.0162635
40 µM	0.175	0.179	0.177	29.064	0.00282843		0.131	0.135	0.133	34.0589	0.00282843		0.176	0.162	0.169	24.1429	0.00989949
50 µM	0.156	0.155	0.1555	25.5337	0.000707107		0.11	0.112	0.111	28.4251	0.00141421		0.096	0.096	0.096	13.7143	0
N2	shN_KKU-213A						shARID1A#1_KKU-213A						shARID1A#2_KKU-213A
Final Conc. (MK-2206 )	O.D 1	O.D 2	Mean O.D	[Nt/Nc]*100	SD		O.D 1	O.D 2	Mean O.D	[Nt/Nc]*100	SD		O.D 1	O.D 2	Mean O.D	[Nt/Nc]*100	SD
Control	0.424	0.422	0.423	100	0.00141421		0.419	0.412	0.4155	100	0.00494975		0.471	0.519	0.495	100	0.0339411
2.5 µM	0.43	0.476	0.453	107.092	0.0325269		0.398	0.392	0.395	95.0662	0.00424264		0.456	0.438	0.447	90.303	0.0127279
5 µM	0.457	0.455	0.456	107.801	0.00141421		0.301	0.314	0.3075	74.0072	0.00919239		0.413	0.417	0.415	83.8384	0.00282843
10 µM	0.459	0.44	0.4495	106.265	0.013435		0.24	0.251	0.2455	59.0854	0.00777817		0.396	0.433	0.4145	83.7374	0.026163
20 µM	0.318	0.349	0.3335	78.8416	0.0219203		0.211	0.21	0.2105	50.6619	0.000707107		0.329	0.3	0.3145	63.5354	0.0205061
40 µM	0.197	0.183	0.19	44.9173	0.00989949		0.141	0.139	0.14	33.6943	0.00141421		0.167	0.169	0.168	33.9394	0.00141421
50 µM	0.125	0.128	0.1265	29.9054	0.00212132		0.122	0.121	0.1215	29.2419	0.000707107		0.126	0.126	0.126	25.4545	0
N3	shN_KKU-213A						shARID1A#1_KKU-213A						shARID1A#2_KKU-213A
Final Conc. (MK-2206 )	O.D 1	O.D 2	Mean O.D	[Nt/Nc]*100	SD		O.D 1	O.D 2	Mean O.D	[Nt/Nc]*100	SD		O.D 1	O.D 2	Mean O.D	[Nt/Nc]*100	SD
Control	0.467	0.453	0.46	100	0.00989949		0.383	0.386	0.3845	100	0.00212132		0.487	0.497	0.492	100	0.00707107
2.5 µM	0.418	0.44	0.429	93.2609	0.0155563		0.287	0.277	0.282	73.342	0.00707107		0.475	0.48	0.4775	97.0528	0.00353553
5 µM	0.458	0.508	0.483	105	0.0353553		0.311	0.312	0.3115	81.0143	0.000707107		0.416	0.405	0.4105	83.435	0.00777817
10 µM	0.512	0.446	0.479	104.13	0.046669		0.318	0.301	0.3095	80.4941	0.0120208		0.424	0.374	0.399	81.0976	0.0353553
20 µM	0.339	0.365	0.352	76.5217	0.0183848		0.232	0.24	0.236	61.3784	0.00565685		0.315	0.338	0.3265	66.3618	0.0162635
40 µM	0.188	0.177	0.1825	39.6739	0.00777817		0.167	0.163	0.165	42.9129	0.00282843		0.182	0.201	0.1915	38.9228	0.013435
50 µM	0.149	0.146	0.1475	32.0652	0.00212132		0.129	0.128	0.1285	33.42	0.000707107		0.122	0.123	0.1225	24.8984	0.000707107
IC50	N
	1	2	3	Mean	SD
shN_KKU-213A	32.92	47.91	43.23	41.3533	7.66919
shARID1A#1_KKU-213A	25.04	18.62	28.04	23.9	4.81236
shARID1A#2_KKU-213A	16.29	26.71	28.59	23.8633	6.62572
N1	shN_HUCCT1						shARID1A#1_HUCCT1						shARID1A#2_HUCCT1
Final Conc. (MK-2206 )	O.D 1	O.D 2	Mean O.D	[Nt/Nc]*100	SD		O.D 1	O.D 2	Mean O.D	[Nt/Nc]*100	SD		O.D 1	O.D 2	Mean O.D	[Nt/Nc]*100	SD
Control	0.391	0.408	0.3995	100	0.0120208		0.466	0.469	0.4675	100	0.00212132		0.517	0.538	0.5275	100	0.0148492
2.5 µM	0.405	0.403	0.404	101.126	0.00141421		0.463	0.43	0.4465	95.508	0.0233345		0.551	0.445	0.498	94.4076	0.0749533
5 µM	0.413	0.407	0.41	102.628	0.00424264		0.448	0.43	0.439	93.9037	0.0127279		0.436	0.453	0.4445	84.2654	0.0120208
10 µM	0.293	0.277	0.285	71.3392	0.0113137		0.307	0.285	0.296	63.3155	0.0155563		0.311	0.32	0.3155	59.8104	0.00636396
20 µM	0.207	0.206	0.2065	51.6896	0.000707107		0.24	0.22	0.23	49.1979	0.0141421		0.253	0.218	0.2355	44.6445	0.0247487
40 µM	0.12	0.118	0.119	29.7872	0.00141421		0.118	0.105	0.1115	23.8503	0.00919239		0.133	0.14	0.1365	25.8768	0.00494975
50 µM	0.113	0.115	0.114	28.5357	0.00141421		0.115	0.099	0.107	22.8877	0.0113137		0.132	0.127	0.1295	24.5498	0.00353553
N2	shN_HUCCT1						shARID1A#1_HUCCT1						shARID1A#2_HUCCT1
Final Conc. (MK-2206 )	O.D 1	O.D 2	Mean O.D	[Nt/Nc]*100	SD		O.D 1	O.D 2	Mean O.D	[Nt/Nc]*100	SD		O.D 1	O.D 2	Mean O.D	[Nt/Nc]*100	SD
Control	0.373	0.401	0.387	100	0.019799		0.391	0.389	0.39	100	0.00141421		0.482	0.492	0.487	100	0.00707107
2.5 µM	0.425	0.417	0.421	108.786	0.00565685		0.376	0.378	0.377	96.6667	0.00141421		0.355	0.411	0.383	78.6448	0.039598
5 µM	0.406	0.477	0.4415	114.083	0.0502046		0.358	0.39	0.374	95.8974	0.0226274		0.391	0.405	0.398	81.7248	0.00989949
10 µM	0.297	0.331	0.314	81.137	0.0240416		0.274	0.271	0.2725	69.8718	0.00212132		0.337	0.325	0.331	67.9671	0.00848528
20 µM	0.235	0.237	0.236	60.9819	0.00141421		0.194	0.211	0.2025	51.9231	0.0120208		0.231	0.218	0.2245	46.0986	0.00919239
40 µM	0.127	0.137	0.132	34.1085	0.00707107		0.119	0.098	0.1085	27.8205	0.0148492		0.134	0.13	0.132	27.1047	0.00282843
50 µM	0.128	0.123	0.1255	32.4289	0.00353553		0.114	0.096	0.105	26.9231	0.0127279		0.135	0.137	0.136	27.9261	0.00141421
N3	shN_HUCCT1						shARID1A#1_HUCCT1						shARID1A#2_HUCCT1
Final Conc. (MK-2206 )	O.D 1	O.D 2	Mean O.D	[Nt/Nc]*100	SD		O.D 1	O.D 2	Mean O.D	[Nt/Nc]*100	SD		O.D 1	O.D 2	Mean O.D	[Nt/Nc]*100	SD
Control	0.596	0.553	0.5745	100	0.0304056		0.695	0.668	0.6815	100	0.0190919		0.599	0.598	0.5985	100	0.000707107
2.5 µM	0.691	0.674	0.6825	118.799	0.0120208		0.608	0.584	0.596	87.4541	0.0169706		0.525	0.49	0.5075	84.7953	0.0247487
5 µM	0.648	0.704	0.676	117.668	0.039598		0.612	0.62	0.616	90.3888	0.00565685		0.499	0.489	0.494	82.5397	0.00707107
10 µM	0.601	0.621	0.611	106.353	0.0141421		0.547	0.523	0.535	78.5033	0.0169706		0.46	0.424	0.442	73.8513	0.0254558
20 µM	0.389	0.433	0.411	71.5405	0.0311127		0.377	0.359	0.368	53.9985	0.0127279		0.338	0.316	0.327	54.6366	0.0155563
40 µM	0.184	0.182	0.183	31.8538	0.00141421		0.196	0.169	0.1825	26.7792	0.0190919		0.186	0.184	0.185	30.9106	0.00141421
50 µM	0.149	0.146	0.1475	25.6745	0.00212132		0.143	0.125	0.134	19.6625	0.0127279		0.165	0.152	0.1585	26.4829	0.00919239
IC50	N
	1	2	3	Mean	SD
shN_KKU-213A	24.47	33.16	40.49	32.7067	8.01962
shARID1A#1_KKU-213A	19.03	22.34	21.45	20.94	1.71292
shARID1A#2_KKU-213A	17	17.69	21.51	18.7333	2.42929
