# Supplementary material for: Therapeutic targeting of ARID1A and PI3K/AKT pathway alterations in cholangiocarcinoma
Source: PeerJ. 2022 Jan 13;10:e12750. doi: 10.7717/peerj.12750 (PMC8761367; doi:10.7717/peerj.12750)
Supplement: Supplemental Information 7 [file peerj-10-12750-s007.xlsx]

## Sheet: Supplemental file 2
Protein expression (Western blot)
	ARID1A protein expression		β-actin expression		ARID1A/β-actin ratio
Cell lines	N1	N2	N1	N2	N1	N2
KKU-452	11004.2	10209.4	29717.7	31014.4	0.370291	0.329184
KKU-055	10840.1	5382.28	27771.7	22918.6	0.390329	0.234843
KKU-213A	30001.1	20374.6	40981.8	29823.4	0.73206	0.683175
KKU-100	27138.6	30118	41921.1	33434.6	0.647373	0.900806
HUCCT1	33206.2	31852.7	50651.7	34787.2	0.65558	0.915645
shN_KKU-213A	49819.3	37907.6	113348	111825	0.439525	0.338992
shARID1A#1_KKU-213A	1041.92	2123.54	99971.2	106505	0.0104222	0.0199385
shARID1A#2_KKU-213A	16375	8432.05	115425	123327	0.141867	0.0683715
shN_HUCCT1	43272.3	54815.8	60707	67304.9	0.712806	0.81444
shARID1A#1_HUCCT1	18181	16980.7	54187.6	48595.5	0.33552	0.34943
shARID1A#2_HUCCT1	23613.5	15784	40903.5	33791.6	0.577298	0.467099
ARID1A-knockdown CCA cell lines treated with MK-2206
Cell	KKU-213A
N1	12h				24h					N2	12h				24h
	shN		shARID1A		ShN		shARID1A				shN		shARID1A		ShN		shARID1A
MK-2206	control	30μM	control	30μM	control	30μM	control	30μM			control	30μM	control	30μM	control	30μM	control	30μM
pAKTS473	27257.4	18278.5	23767.4	12756.2	38143.4	23021.6	37673.6	17621.1		pAKTS473	43837.6	32251.8	40676.8	19048.7	40527.4	30673.3	41804	22320.7
AKT	34255.9	29198.9	22689.6	21597.1	32196	25926.3	31693.5	35166.7		AKT	47065.8	38021.2	38918	37887.2	40642.7	38383.8	40027.6	44614
Bax	53903.2	56096.2	49667.1	58831.6	49182.1	51713.9	57056.2	65414		Bax	54787.6	54928.1	48321.6	55605.7	36571.2	42116.1	43068.8	55034.2
Bcl-2	39855.8	31555.4	25838.4	20633.9	24829.9	27356.3	38452.6	38478.1		Bcl-2	33207.9	27665.7	25442.1	17270.6	17004.5	20993.8	31072.2	37461.1
mTOR	19926.4	15672.5	16822.1	7832.45	21204.9	18405.2	18308.2	8227.69		mTOR	24556.5	19319.7	20727.2	9704.93	22050.4	18075.6	19835	10905
β-actin	83909.2	83626.7	80213.6	86006	84462	82226.4	83052.8	83017.4		β-actin	86715.3	83644.7	82923.4	84642.1	82446.9	85637.8	84367.1	86162.1
	shN				shARID1A						shN				shARID1A
Time	control		30μM		control		30μM			Time	control		30μM		control		30μM
12h	N1	N2	N1	N2	N1	N2	N1	N2		24h	N1	N2	N1	N2	N1	N2	N1	N2
pAKTS473/AKT ratio	0.7957	0.93141	0.625998	0.848258	1.0475	1.04519	0.590644	0.502773		pAKTS473/AKT ratio	1.18473	0.997165	0.887964	0.799121	1.18868	1.04438	0.501074	0.500307
Bax/β-actin ratio	0.642399	0.63181	0.670793	0.656683	0.619186	0.582726	0.684041	0.656951		Bax/β-actin ratio	0.582299	0.443573	0.628921	0.491793	0.686987	0.510493	0.787955	0.638729
Bcl-2/β-actin ratio	0.474987	0.382953	0.377337	0.330752	0.322121	0.306814	0.239912	0.204043		Bcl-2/β-actin ratio	0.293976	0.206248	0.332695	0.245147	0.462989	0.368297	0.463495	0.434775
Bax/Bcl-2 ratio	1.35246	1.64984	1.7777	1.98542	1.92222	1.89928	2.85121	3.21967		Bax/Bcl-2 ratio	1.98077	2.15068	1.89038	2.00612	1.48381	1.38609	1.70003	1.4691
mTOR/β-actin ratio	0.237476	0.283186	0.187411	0.230973	0.209716	0.249956	0.0910686	0.114658		mTOR/β-actin ratio	0.251059	0.26745	0.223836	0.21107	0.220441	0.235104	0.099108	0.126564
Cell	HUCCT1
N1	12h				24h					N2	12h				24h
	shN		shARID1A		ShN		shARID1A				shN		shARID1A		ShN		shARID1A
MK-2206	control	30μM	control	30μM	control	30μM	control	30μM			control	30μM	control	30μM	control	30μM	control	30μM
pAKTS473	22198.3	12970.3	26806.2	8087.52	18296.4	11775.4	26257.7	10303.7		pAKTS473	19808.8	14257.2	26852.6	11633.4	20607.3	15010.3	25964	9852.2
AKT	26088.3	22021.2	26851.2	22612.3	27935.4	22313.9	30480.4	22078.8		AKT	21223.4	20165.7	24941.7	29771.7	23664.3	21035	31860.6	31889.1
Bax	25158.4	24473.9	25443.5	27026.2	24505.6	22070.2	22167	26954.9		Bax	25712.1	21581.3	26841.9	28618	21620.1	23933.4	20637.3	29343.6
Bcl-2	18552.2	15573.3	16714.1	5538.23	22965.4	17017.3	21644.3	9969.23		Bcl-2	13610	18117.7	16650.5	7573.35	19792.9	15980.7	23241.9	11012.5
mTOR	24921.3	16322.1	20410.6	6428.08	19665.9	16200.6	20806.7	7961.86		mTOR	19134.7	15944.1	19592.5	7256.45	21172.4	16841	20767.3	9447.45
β-actin	35097.8	27176.8	29332.8	28917.2	26052.7	23191.4	24159.9	22316.2		β-actin	32924	25135.8	34990.9	27879.9	30445.4	28408.9	32244.1	34844.4
	shN				shARID1A						shN				shARID1A
Time	control		30μM		control		30μM			Time	control		30μM		control		30μM
12h	N1	N2	N1	N2	N1	N2	N1	N2		24h	N1	N2	N1	N2	N1	N2	N1	N2
pAKTS473/AKT ratio	0.850891	0.933345	0.588989	0.707001	0.998321	1.07661	0.357659	0.390755		pAKTS473/AKT ratio	0.654954	0.870818	0.527715	0.713586	0.861462	0.814923	0.46668	0.308953
Bax/β-actin ratio	0.716809	0.780953	0.900544	0.858588	0.867408	0.767111	0.934604	1.02648		Bax/β-actin ratio	0.940614	0.710127	0.951651	0.842464	0.91751	0.640034	1.10852	0.867013
Bcl-2/β-actin ratio	0.528586	0.413378	0.61856	0.720793	0.569807	0.475853	0.185118	0.25346		Bcl-2/β-actin ratio	0.881496	0.65011	0.733777	0.562526	0.895878	0.720809	0.446726	0.316048
Bax/Bcl-2 ratio	1.35609	1.8892	1.45587	1.19117	1.52228	1.61207	5.04869	4.04985		Bax/Bcl-2 ratio	1.06706	1.09232	1.29692	1.49764	1.02415	0.887938	2.48143	2.74329
mTOR/β-actin ratio	0.710055	0.58118	0.60059	0.634317	0.69583	0.559933	0.222293	0.260276		mTOR/β-actin ratio	0.754851	0.695422	0.698558	0.592809	0.861209	0.644065	0.356775	0.271132
