# Supplementary material for: Therapeutic targeting of ARID1A and PI3K/AKT pathway alterations in cholangiocarcinoma
Source: PeerJ. 2022 Jan 13;10:e12750. doi: 10.7717/peerj.12750 (PMC8761367; doi:10.7717/peerj.12750)
Supplement: Supplemental Information 8 [file peerj-10-12750-s008.xlsx]

## Sheet: Supplemental file 3
	Flow cytometry analysis
%Apoptosis	shN_KKU-213A		shARID1A#2_KKU-213A
Conc. (MK-2206 )	N1	N2	N1	N2
Control	29.9	22.6	23.9	19.4
10 µM	35.3	32.1	37.2	31.5
20 µM	37.4	38.5	55	46.4
30 µM	44.1	45.7	66.9	69.5
