# Supplementary material for: Therapeutic targeting of ARID1A and PI3K/AKT pathway alterations in cholangiocarcinoma
Source: PeerJ. 2022 Jan 13;10:e12750. doi: 10.7717/peerj.12750 (PMC8761367; doi:10.7717/peerj.12750)
Supplement: Supplemental Information 9 [file peerj-10-12750-s009.xlsx]

## Sheet: Supplemental file 4
Real time PCR analysis (mRNA expression)
Well	Sample Name	Target Name	CT	Ct Mean		Well	Sample Name	Target Name	CT	Ct Mean
3	shN_KKU-213A	ARID1A	25.7153	25.7913		27	shN_KKU-213A	ACTIN	21.2701	21.3678
4	shARID1A#1_KKU-213A	ARID1A	28.5303	28.5456		28	shARID1A#1_KKU-213A	ACTIN	21.6157	21.688
5	shARID1A#2_KKU-213A	ARID1A	29.9396	29.9519		29	shARID1A#2_KKU-213A	ACTIN	23.8541	23.7812
9	shN_HUCCT1	ARID1A	24.4271	24.4357		33	shN_HUCCT1	ACTIN	18.7982	18.7973
10	shARID1A#1_HUCCT1	ARID1A	28.2881	28.2687		34	shARID1A#1_HUCCT1	ACTIN	20.9692	20.9694
11	shARID1A#2_HUCCT1	ARID1A	27.0307	27.0715		35	shARID1A#2_HUCCT1	ACTIN	20.9555	20.7638
15	shN_KKU-213A	ARID1A	25.8673	25.7913		39	shN_KKU-213A	ACTIN	21.4655	21.3678
16	shARID1A#1_KKU-213A	ARID1A	28.5608	28.5456		40	shARID1A#1_KKU-213A	ACTIN	21.7603	21.688
17	shARID1A#2_KKU-213A	ARID1A	29.9642	29.9519		41	shARID1A#2_KKU-213A	ACTIN	23.7083	23.7812
21	shN_HUCCT1	ARID1A	24.4443	24.4357		45	shN_HUCCT1	ACTIN	18.7963	18.7973
22	shARID1A#1_HUCCT1	ARID1A	28.2492	28.2687		46	shARID1A#1_HUCCT1	ACTIN	20.9697	20.9694
23	shARID1A#2_HUCCT1	ARID1A	27.1123	27.0715		47	shARID1A#2_HUCCT1	ACTIN	20.5721	20.7638
	Sample	Target Name	CT1	CT2	Ct mean		Sample	Target Name	CT1	CT2	Ct mean	DCT	2^-DCT		DCT1	DCT2	2^-DCT1	2^-DCT2	Average-2^-DCT
	shN_KKU-213A	ARID1A	25.7153	25.8673	25.7913		shN_KKU-213A	ACTIN	21.2701	21.4655	21.3678	4.42344	0.0466027		4.34744	4.49944	0.0491236	0.0442112	0.0466674
	shARID1A#1_KKU-213A	ARID1A	28.5303	28.5608	28.5456		shARID1A#1_KKU-213A	ACTIN	21.6157	21.7603	21.688	6.85757	0.00862312		6.8423	6.87284	0.00871489	0.00853233	0.00862361
	shARID1A#2_KKU-213A	ARID1A	29.9396	29.9642	29.9519		shARID1A#2_KKU-213A	ACTIN	23.8541	23.7083	23.7812	6.17075	0.013881		6.15846	6.18304	0.0139997	0.0137632	0.0138815
	Sample	Target Name	CT1	CT2	Ct mean		Sample	Target Name	CT1	CT2	Ct mean	DCT	2^-DCT		DCT1	DCT2	2^-DCT1	2^-DCT2	Average-2^-DCT
	shN_HUCCT1	ARID1A	24.4271	24.4443	24.4357		shN_HUCCT1	ACTIN	18.7982	18.7963	18.7973	5.63845	0.020075		5.62983	5.64708	0.0201954	0.0199554	0.0200754
	shARID1A#1_HUCCT1	ARID1A	28.2881	28.2492	28.2687		shARID1A#1_HUCCT1	ACTIN	20.9692	20.9697	20.9694	7.29922	0.00634914		7.31865	7.2798	0.00626423	0.0064352	0.00634971
	shARID1A#2_HUCCT1	ARID1A	27.0307	27.1123	27.0715		shARID1A#2_HUCCT1	ACTIN	20.9555	20.5721	20.7638	6.30766	0.0126242		6.26684	6.34848	0.0129865	0.0122721	0.0126293
